# Supplementary material for: Hidden Tenants: Microbiota of the Rhizosphere and Phyllosphere of Cordia dodecandra Trees in Mayan Forests and Homegardens
Source: MDPI journal article supplement (doi:10.3390/plants11223098), 2022-11-15
Supplement: s1 [file s1]

# Hidden Tenants: Microbiota of the Rhizosphere and Phyllosphere of *Cordia dodecandra* Trees in Mayan Forests and Homegardens

Carla G. May-Mutul, Miguel A. López-Garrido, Aileen O'Connor-Sánchez, Yuri J. Peña-Ramírez, Natalia Y. Labrín-Sotomayor, Héctor Estrada-Medina and Miriam M. Ferrer

**Supplementary material Table S2.** Taxonomic classification assigned to 1096 fungi OTUs from phyllosphere (phy) and rhizosphere (rhi) *Cordia dodecandra* microbiota in Yucatán's forest (for) and homegarden (hom) populations of the Northeast (NE) and Southwest (SW) region. The last 8 columns present the percent (relative frequency) per sample coded by region, population, and compartment.

| Class                       | Order                       | Family                      | Genus                 | Species                             | SW<br>Hom<br>Phy | NE<br>For<br>Phy | NE<br>Hom<br>Phy | SW<br>For<br>Phy | NE<br>Hom<br>Rhi | NE<br>For<br>Rhi | SW<br>Hom<br>Rhi | SW<br>For<br>Rhi |
|-----------------------------|-----------------------------|-----------------------------|-----------------------|-------------------------------------|------------------|------------------|------------------|------------------|------------------|------------------|------------------|------------------|
| <b>Ascomycota</b>           |                             |                             |                       |                                     |                  |                  |                  |                  |                  |                  |                  |                  |
| Ascomycota <i>Inc. sed.</i> | Ascomycota <i>Inc. sed.</i> | Ascomycota <i>Inc. sed.</i> | <i>Gyrothrix</i>      | <i>Gyrothrix circinata</i>          |                  |                  |                  |                  |                  | 0.108            |                  |                  |
| Ascomycota <i>Inc. sed.</i> | Ascomycota <i>Inc. sed.</i> | Ascomycota <i>Inc. sed.</i> | <i>Virgaria</i>       | <i>Virgaria nigra</i>               |                  |                  |                  |                  | 0.019            |                  |                  |                  |
| Dothideomycetes             | Botryosphaerales            | Botryosphaeriaceae          | <i>Botryosphaeria</i> | unidentified                        |                  |                  |                  |                  |                  | 0.594            |                  |                  |
| Dothideomycetes             | Botryosphaerales            | Botryosphaeriaceae          | <i>Botryosphaeria</i> | unidentified                        |                  |                  |                  |                  |                  |                  | 0.306            |                  |
| Dothideomycetes             | Botryosphaerales            | Botryosphaeriaceae          | <i>Botryosphaeria</i> | unidentified                        |                  |                  |                  |                  | 0.073            |                  |                  |                  |
| Dothideomycetes             | Botryosphaerales            | Botryosphaeriaceae          | <i>Botryosphaeria</i> | unidentified                        |                  |                  |                  |                  | 0.073            |                  |                  |                  |
| Dothideomycetes             | Botryosphaerales            | Botryosphaeriaceae          | <i>Botryosphaeria</i> | unidentified                        |                  |                  |                  |                  | 0.035            |                  |                  |                  |
| Dothideomycetes             | Botryosphaerales            | Botryosphaeriaceae          | <i>Botryosphaeria</i> | unidentified                        |                  |                  |                  |                  | 0.027            |                  |                  |                  |
| Dothideomycetes             | Botryosphaerales            | Botryosphaeriaceae          | <i>Botryosphaeria</i> | unidentified                        |                  |                  |                  |                  |                  | 0.047            |                  |                  |
| Dothideomycetes             | Capnodiales                 | Cladosporiaceae             | <i>Cladosporium</i>   | <i>Cladosporium adianticola</i>     |                  |                  |                  |                  | 0.085            | 0.04             | 0.602            |                  |
| Dothideomycetes             | Capnodiales                 | Cladosporiaceae             | <i>Cladosporium</i>   | <i>Cladosporium cladosporioides</i> |                  | 0.037            |                  |                  |                  |                  |                  |                  |
| Dothideomycetes             | Capnodiales                 | Cladosporiaceae             | <i>Cladosporium</i>   | unidentified                        |                  |                  |                  |                  | 0.031            | 0.081            | 0.043            | 0.278            |

|                 |                           |                           |                           |                                    |       |       |       |       |       |  |  |       |
|-----------------|---------------------------|---------------------------|---------------------------|------------------------------------|-------|-------|-------|-------|-------|--|--|-------|
| Dothideomycetes | Capnodiales               | Cladosporiaceae           | <i>Cladosporium</i>       | unidentified                       |       |       |       |       |       |  |  | 0.126 |
| Dothideomycetes | Capnodiales               | Mycosphaerellaceae        | <i>Annellostypodiella</i> | <i>Annellostypodiella juniperi</i> | 0.024 |       | 0.024 | 0.695 |       |  |  |       |
| Dothideomycetes | Capnodiales               | Mycosphaerellaceae        | <i>Mycosphaerella</i>     | unidentified                       |       |       |       | 0.268 |       |  |  |       |
| Dothideomycetes | Capnodiales               | Mycosphaerellaceae        | <i>Mycosphaerella</i>     | unidentified                       |       |       |       | 0.129 |       |  |  |       |
| Dothideomycetes | Capnodiales               | Mycosphaerellaceae        | unidentified              | unidentified                       |       |       |       | 1.201 |       |  |  |       |
| Dothideomycetes | Capnodiales               | Mycosphaerellaceae        | unidentified              | unidentified                       |       | 0.21  |       |       |       |  |  |       |
| Dothideomycetes | Capnodiales               | Mycosphaerellaceae        | <i>Zasmidium</i>          | <i>Zasmidium rothmanniae</i>       |       |       |       | 0.347 |       |  |  |       |
| Dothideomycetes | Capnodiales               | unidentified              | unidentified              | unidentified                       | 0.033 | 0.03  | 0.033 | 0.347 |       |  |  |       |
| Dothideomycetes | Capnodiales               | unidentified              | unidentified              | unidentified                       | 0.033 |       | 0.033 |       |       |  |  |       |
| Dothideomycetes | Capnodiales               | unidentified              | unidentified              | unidentified                       |       | 0.09  |       |       |       |  |  |       |
| Dothideomycetes | Capnodiales               | unidentified              | unidentified              | unidentified                       |       |       |       | 0.109 |       |  |  |       |
| Dothideomycetes | Capnodiales               | unidentified              | unidentified              | unidentified                       |       | 0.075 |       |       |       |  |  |       |
| Dothideomycetes | Capnodiales               | unidentified              | unidentified              | unidentified                       |       |       |       | 0.099 |       |  |  |       |
| Dothideomycetes | Capnodiales               | unidentified              | unidentified              | unidentified                       |       | 0.067 |       |       |       |  |  |       |
| Dothideomycetes | Capnodiales               | unidentified              | unidentified              | unidentified                       |       |       |       | 0.079 |       |  |  |       |
| Dothideomycetes | Capnodiales               | unidentified              | unidentified              | unidentified                       |       |       |       | 0.079 |       |  |  |       |
| Dothideomycetes | Capnodiales               | unidentified              | unidentified              | unidentified                       | 0.01  |       | 0.01  |       |       |  |  |       |
| Dothideomycetes | Capnodiales               | unidentified              | unidentified              | unidentified                       |       |       |       | 0.03  |       |  |  |       |
| Dothideomycetes | Capnodiales               | unidentified              | unidentified              | unidentified                       |       |       |       |       |       |  |  | 0.505 |
| Dothideomycetes | Dothideales               | Dothideales Inc. sed.     | <i>Hortaea</i>            | <i>Hortaea werneckii</i>           |       |       |       |       |       |  |  | 0.177 |
| Dothideomycetes | Dothideomycetes Inc. sed. | Dothideomycetes Inc. sed. | <i>Leptodiscella</i>      | <i>Leptodiscella africana</i>      |       |       |       |       | 0.062 |  |  |       |
| Dothideomycetes | Dothideomycetes Inc. sed. | Dothideomycetes Inc. sed. | <i>Paramicrothyrium</i>   | unidentified                       | 0.057 |       | 0.057 |       |       |  |  |       |
| Dothideomycetes | Myriangiales              | Elsinoaceae               | unidentified              | unidentified                       |       |       |       | 0.318 |       |  |  |       |

|                 |              |                    |                          |                                         |       |       |       |       |       |  |       |  |
|-----------------|--------------|--------------------|--------------------------|-----------------------------------------|-------|-------|-------|-------|-------|--|-------|--|
| Dothideomycetes | Myriangiales | Elsinoaceae        | unidentified             | unidentified                            | 0.038 |       | 0.038 |       |       |  |       |  |
| Dothideomycetes | Myriangiales | Elsinoaceae        | unidentified             | unidentified                            |       |       |       | 0.159 |       |  |       |  |
| Dothideomycetes | Myriangiales | Elsinoaceae        | unidentified             | unidentified                            |       | 0.09  |       |       |       |  |       |  |
| Dothideomycetes | Myriangiales | Elsinoaceae        | unidentified             | unidentified                            |       |       |       | 0.109 |       |  |       |  |
| Dothideomycetes | Pleosporales | Coniothyriaceae    | unidentified             | unidentified                            |       | 0.157 |       |       |       |  |       |  |
| Dothideomycetes | Pleosporales | Coniothyriaceae    | unidentified             | unidentified                            |       |       |       | 0.089 |       |  |       |  |
| Dothideomycetes | Pleosporales | Corynesporascaceae | <i>Corynespora</i>       | unidentified                            | 0.09  |       | 0.09  |       |       |  |       |  |
| Dothideomycetes | Pleosporales | Dictyosporiaceae   | <i>Gregarithecium</i>    | <i>Gregarithecium curvisporum</i>       |       |       |       | 0.02  |       |  |       |  |
| Dothideomycetes | Pleosporales | Dictyosporiaceae   | <i>Pseudocoleophoma</i>  | <i>Pseudocoleophoma calamagrostidis</i> | 0.024 |       | 0.024 |       | 0.035 |  |       |  |
| Dothideomycetes | Pleosporales | Didymellaceae      | <i>Allophoma</i>         | <i>Allophoma tropica</i>                | 0.029 | 0.12  | 0.029 | 0.03  |       |  |       |  |
| Dothideomycetes | Pleosporales | Didymosphaeriaceae | <i>Dendrothyrium</i>     | unidentified                            |       |       |       | 0.06  |       |  |       |  |
| Dothideomycetes | Pleosporales | Didymosphaeriaceae | <i>Letendraea</i>        | unidentified                            | 0.09  |       | 0.09  |       | 0.015 |  |       |  |
| Dothideomycetes | Pleosporales | Didymosphaeriaceae | <i>Letendraea</i>        | unidentified                            |       |       |       | 0.069 |       |  |       |  |
| Dothideomycetes | Pleosporales | Didymosphaeriaceae | <i>Paraconiothyrium</i>  | unidentified                            |       | 0.03  |       |       |       |  |       |  |
| Dothideomycetes | Pleosporales | Didymosphaeriaceae | <i>Paraphaeosphaeria</i> | unidentified                            |       | 0.082 |       |       |       |  |       |  |
| Dothideomycetes | Pleosporales | Didymosphaeriaceae | <i>Paraphaeosphaeria</i> | unidentified                            | 0.024 |       | 0.024 |       |       |  |       |  |
| Dothideomycetes | Pleosporales | Didymosphaeriaceae | <i>Pseudopithomyces</i>  | <i>Pseudopithomyces chartarum</i>       | 0.181 | 0.075 | 0.181 | 0.278 |       |  | 0.435 |  |
| Dothideomycetes | Pleosporales | Didymosphaeriaceae | unidentified             | unidentified                            | 0.067 |       | 0.067 | 0.228 |       |  |       |  |
| Dothideomycetes | Pleosporales | Didymosphaeriaceae | unidentified             | unidentified                            | 0.024 |       | 0.024 |       |       |  |       |  |
| Dothideomycetes | Pleosporales | Massarinaceae      | <i>Helminthosporium</i>  | unidentified                            |       | 0.022 |       |       |       |  |       |  |
| Dothideomycetes | Pleosporales | Periconiaceae      | <i>Periconia</i>         | <i>Periconia homothallica</i>           |       |       |       | 0.03  |       |  |       |  |

|                 |              |                        |                         |                                       |       |        |       |        |       |       |       |  |
|-----------------|--------------|------------------------|-------------------------|---------------------------------------|-------|--------|-------|--------|-------|-------|-------|--|
| Dothideomycetes | Pleosporales | Phaeosphaeriaceae      | <i>Neosetophoma</i>     | <i>Neosetophoma samararum</i>         |       | 0.045  |       |        |       |       |       |  |
| Dothideomycetes | Pleosporales | Pleosporaceae          | <i>Alternaria</i>       | <i>Alternaria macrospora</i>          |       |        |       |        | 0.015 |       | 0.027 |  |
| Dothideomycetes | Pleosporales | Pleosporaceae          | <i>Alternaria</i>       | unidentified                          | 0.019 | 0.045  | 0.019 | 0.089  |       | 0.081 |       |  |
| Dothideomycetes | Pleosporales | Pleosporaceae          | <i>Alternaria</i>       | unidentified                          |       |        |       |        | 0.05  |       |       |  |
| Dothideomycetes | Pleosporales | Pleosporaceae          | <i>Curvularia</i>       | <i>Curvularia clavata</i>             | 0.038 |        | 0.038 |        | 0.077 |       |       |  |
| Dothideomycetes | Pleosporales | Pleosporaceae          | <i>Curvularia</i>       | <i>Curvularia lunata</i>              | 0.147 |        | 0.147 |        | 0.135 |       | 0.124 |  |
| Dothideomycetes | Pleosporales | Pleosporaceae          | <i>Curvularia</i>       | unidentified                          | 0.128 | 0.12   | 0.128 | 0.089  | 0.012 |       |       |  |
| Dothideomycetes | Pleosporales | Pleosporaceae          | <i>Exserohilum</i>      | unidentified                          |       |        |       | 0.06   |       |       |       |  |
| Dothideomycetes | Pleosporales | Pleosporales Inc. sed. | <i>Matsushimamyces</i>  | <i>Matsushimamyces venustum</i>       |       |        |       |        |       | 0.067 | 0.07  |  |
| Dothideomycetes | Pleosporales | Pleosporales Inc. sed. | <i>Pseudorobillarda</i> | <i>Pseudorobillarda sojae</i>         | 0.014 |        | 0.014 |        |       |       |       |  |
| Dothideomycetes | Pleosporales | Pleosporales Inc. sed. | unidentified            | unidentified                          |       |        |       |        |       |       | 0.086 |  |
| Dothideomycetes | Pleosporales | Sporormiaceae          | <i>Preussia</i>         | unidentified                          |       |        |       |        | 0.05  |       |       |  |
| Dothideomycetes | Pleosporales | Tetraplosphaeriaceae   | <i>Tetraplosphaeria</i> | <i>Tetraplosphaeria yakushimensis</i> |       |        |       |        |       |       | 0.059 |  |
| Dothideomycetes | Pleosporales | Thyridariaceae         | <i>Roussoella</i>       | unidentified                          | 0.024 |        | 0.024 |        | 0.058 |       |       |  |
| Dothideomycetes | Pleosporales | unidentified           | unidentified            | unidentified                          |       | 5.115  |       | 10.667 |       |       |       |  |
| Dothideomycetes | Pleosporales | unidentified           | unidentified            | unidentified                          |       | 12.433 |       |        | 0.22  |       |       |  |
| Dothideomycetes | Pleosporales | unidentified           | unidentified            | unidentified                          | 3.812 |        | 3.812 |        |       |       |       |  |
| Dothideomycetes | Pleosporales | unidentified           | unidentified            | unidentified                          | 2.457 |        | 2.457 | 2.917  |       | 0.216 | 0.102 |  |
| Dothideomycetes | Pleosporales | unidentified           | unidentified            | unidentified                          | 0.428 | 0.846  | 0.428 |        |       |       |       |  |
| Dothideomycetes | Pleosporales | unidentified           | unidentified            | unidentified                          | 0.114 |        | 0.114 | 0.655  |       |       |       |  |
| Dothideomycetes | Pleosporales | unidentified           | unidentified            | unidentified                          | 0.109 | 0.202  | 0.109 | 0.258  |       |       | 0.204 |  |
| Dothideomycetes | Pleosporales | unidentified           | unidentified            | unidentified                          | 0.147 |        | 0.147 |        |       |       |       |  |
| Dothideomycetes | Pleosporales | unidentified           | unidentified            | unidentified                          | 0.033 |        | 0.033 | 0.427  |       |       |       |  |
| Dothideomycetes | Pleosporales | unidentified           | unidentified            | unidentified                          | 0.029 | 0.315  | 0.029 |        |       |       |       |  |
| Dothideomycetes | Pleosporales | unidentified           | unidentified            | unidentified                          |       | 0.315  |       |        |       |       |       |  |

|                 |              |              |              |              |       |       |       |       |       |       |       |  |
|-----------------|--------------|--------------|--------------|--------------|-------|-------|-------|-------|-------|-------|-------|--|
| Dothideomycetes | Pleosporales | unidentified | unidentified | unidentified | 0.09  |       | 0.09  |       | 0.035 | 0.074 | 0.199 |  |
| Dothideomycetes | Pleosporales | unidentified | unidentified | unidentified | 0.052 |       | 0.052 |       |       |       |       |  |
| Dothideomycetes | Pleosporales | unidentified | unidentified | unidentified |       | 0.127 |       |       |       |       |       |  |
| Dothideomycetes | Pleosporales | unidentified | unidentified | unidentified |       | 0.067 |       |       |       |       |       |  |
| Dothideomycetes | Pleosporales | unidentified | unidentified | unidentified | 0.019 |       | 0.019 |       | 0.012 |       |       |  |
| Dothideomycetes | Pleosporales | unidentified | unidentified | unidentified |       | 0.037 |       |       |       |       |       |  |
| Dothideomycetes | Pleosporales | unidentified | unidentified | unidentified | 0.01  |       | 0.01  |       |       |       | 0.048 |  |
| Dothideomycetes | Pleosporales | unidentified | unidentified | unidentified | 0.01  |       | 0.01  |       |       |       |       |  |
| Dothideomycetes | Pleosporales | unidentified | unidentified | unidentified |       | 0.022 |       |       |       |       |       |  |
| Dothideomycetes | Pleosporales | unidentified | unidentified | unidentified |       |       |       |       |       |       | 0.048 |  |
| Dothideomycetes | Pleosporales | unidentified | unidentified | unidentified |       |       |       |       |       |       | 0.048 |  |
| Dothideomycetes | Pleosporales | unidentified | unidentified | unidentified |       |       |       |       | 0.035 |       |       |  |
| Dothideomycetes | Pleosporales | unidentified | unidentified | unidentified |       |       |       |       |       |       | 0.016 |  |
| Dothideomycetes | Pleosporales | unidentified | unidentified | unidentified |       |       |       |       | 0.008 |       |       |  |
| Dothideomycetes | Pleosporales | unidentified | unidentified | unidentified |       |       |       |       | 0.008 |       |       |  |
| Dothideomycetes | Pleosporales | unidentified | unidentified | unidentified |       |       |       |       |       | 0.013 |       |  |
| Dothideomycetes | unidentified | unidentified | unidentified | unidentified | 0.105 | 0.494 | 0.105 |       |       |       |       |  |
| Dothideomycetes | unidentified | unidentified | unidentified | unidentified |       |       |       | 0.893 |       |       |       |  |
| Dothideomycetes | unidentified | unidentified | unidentified | unidentified |       | 0.195 |       | 0.248 |       |       |       |  |
| Dothideomycetes | unidentified | unidentified | unidentified | unidentified | 0.081 | 0.112 | 0.081 |       |       |       |       |  |
| Dothideomycetes | unidentified | unidentified | unidentified | unidentified |       |       |       | 0.258 |       |       |       |  |
| Dothideomycetes | unidentified | unidentified | unidentified | unidentified |       | 0.172 |       |       |       |       |       |  |
| Dothideomycetes | unidentified | unidentified | unidentified | unidentified |       |       |       | 0.198 |       |       |       |  |
| Dothideomycetes | unidentified | unidentified | unidentified | unidentified |       |       |       | 0.189 |       |       |       |  |
| Dothideomycetes | unidentified | unidentified | unidentified | unidentified | 0.024 |       | 0.024 |       | 0.019 |       | 0.167 |  |
| Dothideomycetes | unidentified | unidentified | unidentified | unidentified |       | 0.075 |       |       |       |       |       |  |
| Dothideomycetes | unidentified | unidentified | unidentified | unidentified | 0.014 |       | 0.014 |       |       |       |       |  |
| Dothideomycetes | unidentified | unidentified | unidentified | unidentified |       |       |       | 0.05  |       |       |       |  |

|                 |                 |                                  |                            |                                     |       |       |       |       |       |       |       |       |
|-----------------|-----------------|----------------------------------|----------------------------|-------------------------------------|-------|-------|-------|-------|-------|-------|-------|-------|
| Dothideomycetes | unidentified    | unidentified                     | unidentified               | unidentified                        |       | 0.022 |       |       |       |       |       |       |
| Dothideomycetes | unidentified    | unidentified                     | unidentified               | unidentified                        |       |       |       |       |       |       |       | 1.01  |
| Dothideomycetes | unidentified    | unidentified                     | unidentified               | unidentified                        |       |       |       |       |       |       |       | 0.909 |
| Dothideomycetes | unidentified    | unidentified                     | unidentified               | unidentified                        |       |       |       |       |       | 0.196 |       |       |
| Dothideomycetes | unidentified    | unidentified                     | unidentified               | unidentified                        |       |       |       |       |       | 0.088 |       |       |
| Dothideomycetes | unidentified    | unidentified                     | unidentified               | unidentified                        |       |       |       |       | 0.043 |       |       |       |
| Dothideomycetes | unidentified    | unidentified                     | unidentified               | unidentified                        |       |       |       |       | 0.012 |       |       |       |
| Dothideomycetes | unidentified    | unidentified                     | unidentified               | unidentified                        |       |       |       |       | 0.012 |       |       |       |
| Dothideomycetes | unidentified    | unidentified                     | unidentified               | unidentified                        |       |       |       |       |       | 0.013 |       |       |
| Dothideomycetes | Valsariales     | Valsariaceae                     | <i>Myrmaecium</i>          | <i>Myrmaecium fulvopruinatum</i>    | 0.024 |       | 0.024 |       |       |       |       |       |
| Dothideomycetes | Venturiales     | Sympoventuriaceae                | <i>Scolecobasidium</i>     | <i>Scolecobasidium cateniphorum</i> |       |       |       |       |       |       | 0.048 |       |
| Dothideomycetes | Venturiales     | Sympoventuriaceae                | <i>Scolecobasidium</i>     | <i>Scolecobasidium constrictum</i>  |       |       |       |       |       | 0.061 |       |       |
| Eurotiomycetes  | Chaetothyriales | Chaetothyriales <i>Inc. sed.</i> | <i>Hyalocladosporiella</i> | <i>Hyalocladosporiella tectonae</i> | 0.067 | 0.157 | 0.067 |       |       |       |       |       |
| Eurotiomycetes  | Chaetothyriales | Chaetothyriales <i>Inc. sed.</i> | <i>Neostrelitziana</i>     | <i>Neostrelitziana acaciigena</i>   | 0.109 |       | 0.109 | 0.159 |       |       |       |       |
| Eurotiomycetes  | Chaetothyriales | Chaetothyriales <i>Inc. sed.</i> | <i>Strelitziana</i>        | <i>Strelitziana africana</i>        |       |       |       | 0.714 |       |       |       |       |
| Eurotiomycetes  | Chaetothyriales | Chaetothyriales <i>Inc. sed.</i> | <i>Strelitziana</i>        | <i>Strelitziana malaysiana</i>      | 6.811 | 0.412 | 6.811 | 0.605 |       |       |       |       |
| Eurotiomycetes  | Chaetothyriales | Chaetothyriales <i>Inc. sed.</i> | <i>Strelitziana</i>        | unidentified                        | 2.576 | 1.76  | 2.576 | 5.041 |       |       |       |       |
| Eurotiomycetes  | Chaetothyriales | Chaetothyriales <i>Inc. sed.</i> | <i>Strelitziana</i>        | unidentified                        | 0.808 |       | 0.808 |       |       |       |       |       |
| Eurotiomycetes  | Chaetothyriales | Chaetothyriales <i>Inc. sed.</i> | <i>Strelitziana</i>        | unidentified                        | 0.399 |       | 0.399 |       |       |       |       |       |
| Eurotiomycetes  | Chaetothyriales | Chaetothyriales <i>Inc. sed.</i> | <i>Strelitziana</i>        | unidentified                        |       |       |       | 0.248 |       |       |       |       |
| Eurotiomycetes  | Chaetothyriales | Chaetothyriales <i>Inc. sed.</i> | <i>Xenobotrytis</i>        | <i>Xenobotrytis acaducospora</i>    |       |       |       |       | 0.062 | 0.587 | 0.167 |       |
| Eurotiomycetes  | Chaetothyriales | Cyphellophoraceae                | <i>Cyphellophora</i>       | unidentified                        | 0.352 |       | 0.352 |       |       |       |       |       |

|                |                 |                     |                            |                                    |       |       |       |        |       |       |       |  |
|----------------|-----------------|---------------------|----------------------------|------------------------------------|-------|-------|-------|--------|-------|-------|-------|--|
| Eurotiomycetes | Chaetothyriales | Cyphellophoraceae   | <i>Cyphellophora</i>       | unidentified                       | 0.124 |       | 0.124 |        |       |       |       |  |
| Eurotiomycetes | Chaetothyriales | Cyphellophoraceae   | <i>Cyphellophora</i>       | unidentified                       |       | 0.075 |       | 0.069  |       |       |       |  |
| Eurotiomycetes | Chaetothyriales | Cyphellophoraceae   | <i>Cyphellophora</i>       | unidentified                       |       |       |       | 0.079  |       |       |       |  |
| Eurotiomycetes | Chaetothyriales | Herpotrichiellaceae | <i>Cladophialophora</i>    | unidentified                       |       |       |       | 0.03   |       | 0.047 |       |  |
| Eurotiomycetes | Chaetothyriales | Herpotrichiellaceae | <i>Cladophialophora</i>    | unidentified                       |       |       |       |        | 0.263 |       | 0.086 |  |
| Eurotiomycetes | Chaetothyriales | Herpotrichiellaceae | <i>Cladophialophora</i>    | unidentified                       |       |       |       |        | 0.097 |       |       |  |
| Eurotiomycetes | Chaetothyriales | Herpotrichiellaceae | <i>Cladophialophora</i>    | unidentified                       |       |       |       |        |       | 0.02  |       |  |
| Eurotiomycetes | Chaetothyriales | Herpotrichiellaceae | <i>Exophiala</i>           | unidentified                       |       |       |       |        |       |       | 0.043 |  |
| Eurotiomycetes | Chaetothyriales | Herpotrichiellaceae | <i>Melanoctona</i>         | <i>Melanoctona tectonae</i>        |       |       |       |        |       |       | 0.021 |  |
| Eurotiomycetes | Chaetothyriales | Herpotrichiellaceae | unidentified               | unidentified                       |       |       |       |        |       | 12.15 |       |  |
| Eurotiomycetes | Chaetothyriales | Herpotrichiellaceae | unidentified               | unidentified                       |       |       |       |        |       | 0.594 |       |  |
| Eurotiomycetes | Chaetothyriales | Herpotrichiellaceae | unidentified               | unidentified                       |       |       |       |        |       | 0.216 |       |  |
| Eurotiomycetes | Chaetothyriales | Herpotrichiellaceae | unidentified               | unidentified                       |       |       |       |        |       |       | 0.075 |  |
| Eurotiomycetes | Chaetothyriales | Herpotrichiellaceae | unidentified               | unidentified                       |       |       |       |        |       | 0.02  |       |  |
| Eurotiomycetes | Chaetothyriales | Trichomeriaceae     | <i>Brycekendrickomyces</i> | <i>Brycekendrickomyces acaciae</i> |       | 0.037 |       |        |       |       |       |  |
| Eurotiomycetes | Chaetothyriales | Trichomeriaceae     | <i>Trichomerium</i>        | <i>Trichomerium siamensis</i>      |       | 0.037 |       | 0.308  |       | 0.027 |       |  |
| Eurotiomycetes | Chaetothyriales | unidentified        | unidentified               | unidentified                       | 0.138 |       | 0.138 | 28.855 |       |       |       |  |
| Eurotiomycetes | Chaetothyriales | unidentified        | unidentified               | unidentified                       | 0.095 | 0.15  | 0.095 | 3.88   |       |       |       |  |
| Eurotiomycetes | Chaetothyriales | unidentified        | unidentified               | unidentified                       | 0.029 | 1.805 | 0.029 | 1.578  |       |       |       |  |
| Eurotiomycetes | Chaetothyriales | unidentified        | unidentified               | unidentified                       | 0.337 | 0.404 | 0.337 | 0.248  |       |       |       |  |
| Eurotiomycetes | Chaetothyriales | unidentified        | unidentified               | unidentified                       | 0.404 |       | 0.404 |        |       |       |       |  |
| Eurotiomycetes | Chaetothyriales | unidentified        | unidentified               | unidentified                       | 0.399 |       | 0.399 |        |       |       |       |  |
| Eurotiomycetes | Chaetothyriales | unidentified        | unidentified               | unidentified                       | 0.157 | 0.12  | 0.157 |        |       |       |       |  |
| Eurotiomycetes | Chaetothyriales | unidentified        | unidentified               | unidentified                       | 0.157 | 0.082 | 0.157 |        |       |       |       |  |
| Eurotiomycetes | Chaetothyriales | unidentified        | unidentified               | unidentified                       | 0.128 |       | 0.128 |        |       |       |       |  |
| Eurotiomycetes | Chaetothyriales | unidentified        | unidentified               | unidentified                       | 0.109 |       | 0.109 |        |       |       |       |  |

|                |                 |              |              |              |       |       |       |       |       |       |       |  |
|----------------|-----------------|--------------|--------------|--------------|-------|-------|-------|-------|-------|-------|-------|--|
| Eurotiomycetes | Chaetothyriales | unidentified | unidentified | unidentified | 0.081 | 0.082 | 0.081 |       |       | 0.074 | 0.075 |  |
| Eurotiomycetes | Chaetothyriales | unidentified | unidentified | unidentified |       | 0.322 |       |       |       |       |       |  |
| Eurotiomycetes | Chaetothyriales | unidentified | unidentified | unidentified |       |       |       | 0.387 |       |       |       |  |
| Eurotiomycetes | Chaetothyriales | unidentified | unidentified | unidentified | 0.09  |       | 0.09  |       |       |       |       |  |
| Eurotiomycetes | Chaetothyriales | unidentified | unidentified | unidentified | 0.062 |       | 0.062 | 0.109 | 0.008 |       |       |  |
| Eurotiomycetes | Chaetothyriales | unidentified | unidentified | unidentified | 0.019 | 0.202 | 0.019 |       |       |       |       |  |
| Eurotiomycetes | Chaetothyriales | unidentified | unidentified | unidentified |       |       |       | 0.218 |       |       |       |  |
| Eurotiomycetes | Chaetothyriales | unidentified | unidentified | unidentified |       | 0.045 |       | 0.129 |       |       |       |  |
| Eurotiomycetes | Chaetothyriales | unidentified | unidentified | unidentified |       |       |       | 0.179 |       |       |       |  |
| Eurotiomycetes | Chaetothyriales | unidentified | unidentified | unidentified | 0.038 |       | 0.038 |       |       |       |       |  |
| Eurotiomycetes | Chaetothyriales | unidentified | unidentified | unidentified |       |       |       | 0.159 |       |       |       |  |
| Eurotiomycetes | Chaetothyriales | unidentified | unidentified | unidentified |       | 0.097 |       |       |       |       |       |  |
| Eurotiomycetes | Chaetothyriales | unidentified | unidentified | unidentified |       |       |       | 0.129 |       |       |       |  |
| Eurotiomycetes | Chaetothyriales | unidentified | unidentified | unidentified |       | 0.09  |       |       |       |       |       |  |
| Eurotiomycetes | Chaetothyriales | unidentified | unidentified | unidentified |       |       |       | 0.109 |       |       |       |  |
| Eurotiomycetes | Chaetothyriales | unidentified | unidentified | unidentified | 0.024 |       | 0.024 |       |       |       |       |  |
| Eurotiomycetes | Chaetothyriales | unidentified | unidentified | unidentified | 0.024 |       | 0.024 |       |       |       |       |  |
| Eurotiomycetes | Chaetothyriales | unidentified | unidentified | unidentified |       | 0.067 |       |       |       |       |       |  |
| Eurotiomycetes | Chaetothyriales | unidentified | unidentified | unidentified | 0.019 |       | 0.019 |       |       |       |       |  |
| Eurotiomycetes | Chaetothyriales | unidentified | unidentified | unidentified |       |       |       | 0.079 |       |       |       |  |
| Eurotiomycetes | Chaetothyriales | unidentified | unidentified | unidentified |       |       |       | 0.069 |       |       |       |  |
| Eurotiomycetes | Chaetothyriales | unidentified | unidentified | unidentified |       | 0.045 |       |       |       |       |       |  |
| Eurotiomycetes | Chaetothyriales | unidentified | unidentified | unidentified |       | 0.045 |       |       |       |       |       |  |
| Eurotiomycetes | Chaetothyriales | unidentified | unidentified | unidentified |       | 0.045 |       |       |       |       |       |  |
| Eurotiomycetes | Chaetothyriales | unidentified | unidentified | unidentified |       |       |       | 0.06  |       |       |       |  |
| Eurotiomycetes | Chaetothyriales | unidentified | unidentified | unidentified |       | 0.037 |       |       |       |       |       |  |
| Eurotiomycetes | Chaetothyriales | unidentified | unidentified | unidentified |       | 0.03  |       |       |       |       |       |  |
| Eurotiomycetes | Chaetothyriales | unidentified | unidentified | unidentified |       |       |       | 0.03  |       |       |       |  |

|                |                 |              |              |              |  |       |  |  |       |       |       |  |
|----------------|-----------------|--------------|--------------|--------------|--|-------|--|--|-------|-------|-------|--|
| Eurotiomycetes | Chaetothyriales | unidentified | unidentified | unidentified |  | 0.015 |  |  |       | 0.169 | 0.269 |  |
| Eurotiomycetes | Chaetothyriales | unidentified | unidentified | unidentified |  |       |  |  |       | 0.513 |       |  |
| Eurotiomycetes | Chaetothyriales | unidentified | unidentified | unidentified |  |       |  |  | 0.147 | 0.223 |       |  |
| Eurotiomycetes | Chaetothyriales | unidentified | unidentified | unidentified |  |       |  |  |       | 0.277 |       |  |
| Eurotiomycetes | Chaetothyriales | unidentified | unidentified | unidentified |  |       |  |  |       | 0.216 |       |  |
| Eurotiomycetes | Chaetothyriales | unidentified | unidentified | unidentified |  |       |  |  |       |       | 0.167 |  |
| Eurotiomycetes | Chaetothyriales | unidentified | unidentified | unidentified |  |       |  |  | 0.108 |       |       |  |
| Eurotiomycetes | Chaetothyriales | unidentified | unidentified | unidentified |  |       |  |  |       |       | 0.107 |  |
| Eurotiomycetes | Chaetothyriales | unidentified | unidentified | unidentified |  |       |  |  | 0.073 |       |       |  |
| Eurotiomycetes | Chaetothyriales | unidentified | unidentified | unidentified |  |       |  |  |       | 0.108 |       |  |
| Eurotiomycetes | Chaetothyriales | unidentified | unidentified | unidentified |  |       |  |  |       |       | 0.086 |  |
| Eurotiomycetes | Chaetothyriales | unidentified | unidentified | unidentified |  |       |  |  |       | 0.108 |       |  |
| Eurotiomycetes | Chaetothyriales | unidentified | unidentified | unidentified |  |       |  |  | 0.058 |       |       |  |
| Eurotiomycetes | Chaetothyriales | unidentified | unidentified | unidentified |  |       |  |  |       | 0.094 |       |  |
| Eurotiomycetes | Chaetothyriales | unidentified | unidentified | unidentified |  |       |  |  |       |       | 0.075 |  |
| Eurotiomycetes | Chaetothyriales | unidentified | unidentified | unidentified |  |       |  |  |       |       | 0.075 |  |
| Eurotiomycetes | Chaetothyriales | unidentified | unidentified | unidentified |  |       |  |  |       | 0.088 |       |  |
| Eurotiomycetes | Chaetothyriales | unidentified | unidentified | unidentified |  |       |  |  |       |       | 0.048 |  |
| Eurotiomycetes | Chaetothyriales | unidentified | unidentified | unidentified |  |       |  |  | 0.035 |       |       |  |
| Eurotiomycetes | Chaetothyriales | unidentified | unidentified | unidentified |  |       |  |  |       |       | 0.043 |  |
| Eurotiomycetes | Chaetothyriales | unidentified | unidentified | unidentified |  |       |  |  |       | 0.047 |       |  |
| Eurotiomycetes | Chaetothyriales | unidentified | unidentified | unidentified |  |       |  |  |       | 0.04  |       |  |
| Eurotiomycetes | Chaetothyriales | unidentified | unidentified | unidentified |  |       |  |  | 0.023 |       |       |  |
| Eurotiomycetes | Chaetothyriales | unidentified | unidentified | unidentified |  |       |  |  |       | 0.034 |       |  |
| Eurotiomycetes | Chaetothyriales | unidentified | unidentified | unidentified |  |       |  |  |       | 0.034 |       |  |
| Eurotiomycetes | Chaetothyriales | unidentified | unidentified | unidentified |  |       |  |  |       | 0.027 |       |  |
| Eurotiomycetes | Chaetothyriales | unidentified | unidentified | unidentified |  |       |  |  | 0.012 |       |       |  |
| Eurotiomycetes | Chaetothyriales | unidentified | unidentified | unidentified |  |       |  |  |       |       | 0.016 |  |

|                |                 |                |                    |                                   |  |       |  |  |       |       |       |       |
|----------------|-----------------|----------------|--------------------|-----------------------------------|--|-------|--|--|-------|-------|-------|-------|
| Eurotiomycetes | Chaetothyriales | unidentified   | unidentified       | unidentified                      |  |       |  |  |       |       | 0.016 |       |
| Eurotiomycetes | Chaetothyriales | unidentified   | unidentified       | unidentified                      |  |       |  |  | 0.012 |       |       |       |
| Eurotiomycetes | Eurotiales      | Aspergillaceae | <i>Aspergillus</i> | <i>Aspergillus aculeatus</i>      |  |       |  |  |       |       | 0.027 |       |
| Eurotiomycetes | Eurotiales      | Aspergillaceae | <i>Aspergillus</i> | <i>Aspergillus carbonarius</i>    |  | 0.045 |  |  |       |       | 0.118 |       |
| Eurotiomycetes | Eurotiales      | Aspergillaceae | <i>Aspergillus</i> | <i>Aspergillus eburneocremeus</i> |  |       |  |  |       | 0.25  | 0.054 |       |
| Eurotiomycetes | Eurotiales      | Aspergillaceae | <i>Aspergillus</i> | <i>Aspergillus flavus</i>         |  |       |  |  |       |       | 0.145 |       |
| Eurotiomycetes | Eurotiales      | Aspergillaceae | <i>Aspergillus</i> | <i>Aspergillus nidulans</i>       |  |       |  |  |       |       |       | 0.152 |
| Eurotiomycetes | Eurotiales      | Aspergillaceae | <i>Aspergillus</i> | <i>Aspergillus sclerotiorum</i>   |  |       |  |  |       | 0.121 | 0.081 |       |
| Eurotiomycetes | Eurotiales      | Aspergillaceae | <i>Aspergillus</i> | <i>Aspergillus tamaritii</i>      |  |       |  |  | 0.043 | 0.02  | 0.129 |       |
| Eurotiomycetes | Eurotiales      | Aspergillaceae | <i>Aspergillus</i> | unidentified                      |  |       |  |  |       |       | 6.118 |       |
| Eurotiomycetes | Eurotiales      | Aspergillaceae | <i>Aspergillus</i> | unidentified                      |  |       |  |  |       |       | 0.021 |       |
| Eurotiomycetes | Eurotiales      | Aspergillaceae | <i>Penicillium</i> | unidentified                      |  |       |  |  |       |       | 0.567 |       |
| Eurotiomycetes | Eurotiales      | Aspergillaceae | <i>Penicillium</i> | unidentified                      |  |       |  |  | 0.108 |       |       |       |
| Eurotiomycetes | Eurotiales      | Aspergillaceae | <i>Penicillium</i> | unidentified                      |  |       |  |  |       |       | 0.15  |       |
| Eurotiomycetes | Eurotiales      | Aspergillaceae | <i>Penicillium</i> | unidentified                      |  |       |  |  | 0.066 | 0.067 |       |       |
| Eurotiomycetes | Eurotiales      | Aspergillaceae | <i>Penicillium</i> | unidentified                      |  |       |  |  |       | 0.115 |       |       |
| Eurotiomycetes | Eurotiales      | Aspergillaceae | <i>Penicillium</i> | unidentified                      |  |       |  |  |       |       | 0.07  |       |
| Eurotiomycetes | Eurotiales      | Aspergillaceae | <i>Penicillium</i> | unidentified                      |  |       |  |  |       |       | 0.059 |       |
| Eurotiomycetes | Eurotiales      | Aspergillaceae | <i>Penicillium</i> | unidentified                      |  |       |  |  |       | 0.067 |       |       |
| Eurotiomycetes | Eurotiales      | Aspergillaceae | <i>Penicillium</i> | unidentified                      |  |       |  |  |       |       |       | 0.227 |
| Eurotiomycetes | Eurotiales      | Aspergillaceae | unidentified       | unidentified                      |  |       |  |  |       |       |       | 0.581 |
| Eurotiomycetes | Eurotiales      | Aspergillaceae | unidentified       | unidentified                      |  |       |  |  |       |       | 0.07  | 0.152 |
| Eurotiomycetes | Eurotiales      | Aspergillaceae | unidentified       | unidentified                      |  |       |  |  |       |       | 0.054 |       |
| Eurotiomycetes | Eurotiales      | Aspergillaceae | unidentified       | unidentified                      |  |       |  |  |       | 0.047 |       |       |
| Eurotiomycetes | Eurotiales      | Trichocomaceae | <i>Talaromyces</i> | <i>Talaromyces aculeatus</i>      |  |       |  |  | 0.035 |       | 0.129 |       |

|                 |                       |                       |                       |                                |       |       |       |       |       |       |       |       |
|-----------------|-----------------------|-----------------------|-----------------------|--------------------------------|-------|-------|-------|-------|-------|-------|-------|-------|
| Eurotiomycetes  | Eurotiales            | Trichocomaceae        | <i>Talaromyces</i>    | <i>Talaromyces minioluteus</i> |       |       |       |       |       |       |       | 1.465 |
| Eurotiomycetes  | Eurotiales            | Trichocomaceae        | <i>Talaromyces</i>    | unidentified                   |       |       |       |       |       |       | 0.064 |       |
| Eurotiomycetes  | Eurotiales            | Trichocomaceae        | unidentified          | unidentified                   |       |       |       |       |       |       | 0.032 |       |
| Eurotiomycetes  | Eurotiales            | unidentified          | unidentified          | unidentified                   |       |       |       |       | 0.085 |       |       |       |
| Eurotiomycetes  | Onygenales            | unidentified          | unidentified          | unidentified                   |       |       |       |       | 0.027 |       |       |       |
| Eurotiomycetes  | unidentified          | unidentified          | unidentified          | unidentified                   |       |       |       |       |       | 0.074 |       |       |
| Eurotiomycetes  | unidentified          | unidentified          | unidentified          | unidentified                   |       |       |       |       |       | 0.054 |       |       |
| Lecanoromycetes | Caliciales            | Physciaceae           | <i>Physcia</i>        | <i>Physcia atrostriata</i>     |       |       |       | 0.03  |       |       |       |       |
| Lecanoromycetes | Lecanorales           | Ectolechiaceae        | <i>Calopadia</i>      | <i>Calopadia foliicola</i>     | 0.38  |       | 0.38  | 0.06  |       |       |       |       |
| Lecanoromycetes | Lecanorales           | Ramalinaceae          | unidentified          | unidentified                   | 0.038 |       | 0.038 |       |       |       |       |       |
| Leotiomyces     | Helotiales            | Dermateaceae          | <i>Trimmatostroma</i> | <i>Trimmatostroma cordae</i>   | 0.057 |       | 0.057 | 0.109 |       |       |       |       |
| Leotiomyces     | Helotiales            | Helotiaceae           | <i>Articulospora</i>  | unidentified                   |       | 0.127 |       |       |       |       |       |       |
| Leotiomyces     | Helotiales            | Helotiaceae           | <i>Articulospora</i>  | unidentified                   | 0.024 |       | 0.024 | 0.06  |       |       |       |       |
| Leotiomyces     | Helotiales            | Helotiaceae           | <i>Articulospora</i>  | unidentified                   |       |       |       | 0.069 |       |       |       |       |
| Leotiomyces     | Helotiales            | Rutstroemiaceae       | <i>Lambertella</i>    | unidentified                   |       |       |       | 0.03  |       |       |       |       |
| Leotiomyces     | Helotiales            | unidentified          | unidentified          | unidentified                   |       | 0.112 |       |       |       |       |       |       |
| Leotiomyces     | Helotiales            | unidentified          | unidentified          | unidentified                   |       |       |       |       |       |       | 0.301 |       |
| Leotiomyces     | Leotiomyces Inc. sed. | Leotiomyces Inc. sed. | <i>Scytalidium</i>    | unidentified                   |       |       |       |       | 0.081 |       |       |       |
| Leotiomyces     | Leotiomyces Inc. sed. | Leotiomyces Inc. sed. | <i>Scytalidium</i>    | unidentified                   |       |       |       |       |       |       | 0.086 |       |
| Leotiomyces     | unidentified          | unidentified          | unidentified          | unidentified                   | 0.024 |       | 0.024 |       |       |       |       |       |
| Leotiomyces     | unidentified          | unidentified          | unidentified          | unidentified                   |       | 0.022 |       |       |       |       |       |       |
| Leotiomyces     | unidentified          | unidentified          | unidentified          | unidentified                   |       |       |       |       | 0.178 |       |       |       |
| Leotiomyces     | unidentified          | unidentified          | unidentified          | unidentified                   |       |       |       |       | 0.135 |       |       |       |
| Leotiomyces     | unidentified          | unidentified          | unidentified          | unidentified                   |       |       |       |       | 0.081 |       |       |       |
| Leotiomyces     | unidentified          | unidentified          | unidentified          | unidentified                   |       |       |       |       |       |       | 0.064 |       |
| Orbiliomycetes  | Orbiliales            | Orbiliaceae           | <i>Dactylella</i>     | <i>Dactylella clavata</i>      |       |       |       |       |       | 0.04  |       |       |

|                 |                   |                   |                       |                                         |  |       |  |       |       |       |       |       |
|-----------------|-------------------|-------------------|-----------------------|-----------------------------------------|--|-------|--|-------|-------|-------|-------|-------|
| Orbiliomycetes  | Orbiliales        | Orbiliaceae       | <i>Dactylellina</i>   | <i>Dactylellina cionopaga</i>           |  |       |  |       | 0.05  |       | 0.081 |       |
| Orbiliomycetes  | Orbiliales        | Orbiliaceae       | <i>Orbilia</i>        | <i>Orbilia auricolor</i>                |  |       |  |       | 0.023 |       | 0.075 |       |
| Orbiliomycetes  | Orbiliales        | Orbiliaceae       | <i>Orbilia</i>        | unidentified                            |  | 0.022 |  |       |       |       |       |       |
| Orbiliomycetes  | Orbiliales        | Orbiliaceae       | <i>Orbilia</i>        | unidentified                            |  |       |  |       |       |       | 0.252 |       |
| Orbiliomycetes  | Orbiliales        | Orbiliaceae       | <i>Orbilia</i>        | unidentified                            |  |       |  |       |       |       | 0.177 |       |
| Orbiliomycetes  | Orbiliales        | Orbiliaceae       | <i>Orbilia</i>        | unidentified                            |  |       |  |       |       | 0.047 |       |       |
| Orbiliomycetes  | Orbiliales        | Orbiliaceae       | unidentified          | unidentified                            |  |       |  |       |       |       | 0.15  | 0.379 |
| Orbiliomycetes  | Orbiliales        | unidentified      | unidentified          | unidentified                            |  | 0.082 |  |       | 0.031 |       |       |       |
| Orbiliomycetes  | Orbiliales        | unidentified      | unidentified          | unidentified                            |  |       |  | 0.02  |       |       |       |       |
| Orbiliomycetes  | Orbiliales        | unidentified      | unidentified          | unidentified                            |  |       |  |       |       |       | 0.043 |       |
| Orbiliomycetes  | unidentified      | unidentified      | unidentified          | unidentified                            |  |       |  |       |       | 0.027 |       |       |
| Pezizomycetes   | Pezizales         | Pezizaceae        | <i>Mattirolomyces</i> | <i>Mattirolomyces mexicanus</i>         |  |       |  |       |       |       | 3.599 |       |
| Pezizomycetes   | Pezizales         | Pezizaceae        | unidentified          | unidentified                            |  |       |  |       |       |       | 0.048 |       |
| Pezizomycetes   | Pezizales         | Pyronemataceae    | unidentified          | unidentified                            |  |       |  |       | 0.008 |       |       |       |
| Pezizomycetes   | Pezizales         | unidentified      | unidentified          | unidentified                            |  |       |  |       |       | 0.02  |       |       |
| Saccharomycetes | Saccharomycetales | Debaryomycetaceae | <i>Schwanniomyces</i> | <i>Schwanniomyces pseudopolymorphus</i> |  |       |  |       |       |       | 0.107 | 0.152 |
| Saccharomycetes | Saccharomycetales | Saccharomycetales | <i>Candida</i>        | unidentified                            |  |       |  |       |       |       | 0.064 |       |
| Sordariomycetes | Branch06          | unidentified      | unidentified          | unidentified                            |  |       |  |       |       |       | 0.107 |       |
| Sordariomycetes | Branch06          | unidentified      | unidentified          | unidentified                            |  |       |  |       | 0.058 |       |       |       |
| Sordariomycetes | Branch06          | unidentified      | unidentified          | unidentified                            |  |       |  |       |       |       | 0.07  |       |
| Sordariomycetes | Branch06          | unidentified      | unidentified          | unidentified                            |  |       |  |       |       | 0.074 |       |       |
| Sordariomycetes | Branch06          | unidentified      | unidentified          | unidentified                            |  |       |  |       |       |       |       | 0.227 |
| Sordariomycetes | Branch06          | unidentified      | unidentified          | unidentified                            |  |       |  |       |       |       | 0.027 |       |
| Sordariomycetes | Diaporthales      | Schizoparmaceae   | <i>Coniella</i>       | unidentified                            |  |       |  | 0.228 |       |       |       |       |
| Sordariomycetes | Diaporthales      | unidentified      | unidentified          | unidentified                            |  |       |  | 0.139 |       |       |       |       |

|                 |               |                       |                       |                                       |       |       |       |       |       |       |       |       |
|-----------------|---------------|-----------------------|-----------------------|---------------------------------------|-------|-------|-------|-------|-------|-------|-------|-------|
| Sordariomycetes | Glomerellales | Glomerellaceae        | <i>Colletotrichum</i> | <i>Colletotrichum gloeosporioides</i> | 0.228 |       | 0.228 | 0.109 |       |       |       |       |
| Sordariomycetes | Glomerellales | Glomerellaceae        | <i>Colletotrichum</i> | <i>Colletotrichum truncatum</i>       |       |       |       |       |       |       | 0.07  |       |
| Sordariomycetes | Glomerellales | Glomerellaceae        | <i>Colletotrichum</i> | unidentified                          | 0.052 | 0.157 | 0.052 |       |       |       |       |       |
| Sordariomycetes | Glomerellales | Glomerellaceae        | <i>Colletotrichum</i> | unidentified                          | 0.062 |       | 0.062 |       |       |       |       |       |
| Sordariomycetes | Glomerellales | Glomerellaceae        | <i>Colletotrichum</i> | unidentified                          |       |       |       | 0.079 |       |       |       |       |
| Sordariomycetes | Glomerellales | Glomerellaceae        | <i>Colletotrichum</i> | unidentified                          |       |       |       |       | 0.031 |       |       |       |
| Sordariomycetes | Glomerellales | Plectosphaerellaceae  | unidentified          | unidentified                          |       | 0.022 |       |       |       |       |       |       |
| Sordariomycetes | Hypocreales   | Bionectriaceae        | <i>Hydropisphaera</i> | unidentified                          |       |       |       |       |       |       | 0.075 |       |
| Sordariomycetes | Hypocreales   | Clavicipitaceae       | unidentified          | unidentified                          |       |       |       |       | 0.019 |       |       |       |
| Sordariomycetes | Hypocreales   | Cordycipitaceae       | <i>Beauveria</i>      | unidentified                          |       |       |       |       |       |       | 0.011 |       |
| Sordariomycetes | Hypocreales   | Cordycipitaceae       | <i>Simplicillium</i>  | unidentified                          | 0.033 |       | 0.033 |       |       |       |       |       |
| Sordariomycetes | Hypocreales   | Hypocreaceae          | <i>Trichoderma</i>    | <i>Trichoderma citrinoviride</i>      |       |       |       |       | 0.039 |       |       |       |
| Sordariomycetes | Hypocreales   | Hypocreaceae          | <i>Trichoderma</i>    | <i>Trichoderma longibrachiatum</i>    |       |       |       |       |       |       | 0.016 | 2.096 |
| Sordariomycetes | Hypocreales   | Hypocreaceae          | <i>Trichoderma</i>    | <i>Trichoderma virens</i>             |       |       |       |       |       |       | 0.059 | 1.086 |
| Sordariomycetes | Hypocreales   | Hypocreaceae          | <i>Trichoderma</i>    | unidentified                          |       |       |       |       |       | 0.189 |       |       |
| Sordariomycetes | Hypocreales   | Hypocreaceae          | <i>Trichoderma</i>    | unidentified                          |       |       |       |       | 0.023 |       |       |       |
| Sordariomycetes | Hypocreales   | Hypocreales Inc. sed. | <i>Acremonium</i>     | <i>Acremonium hennebertii</i>         |       |       |       |       |       |       | 0.199 |       |
| Sordariomycetes | Hypocreales   | Hypocreales Inc. sed. | <i>Solheimia</i>      | <i>Solheimia costispora</i>           | 0.014 | 0.037 | 0.014 |       | 0.054 |       | 0.032 |       |
| Sordariomycetes | Hypocreales   | Nectriaceae           | <i>Albonectria</i>    | <i>Albonectria rigidiuscula</i>       | 0.086 |       | 0.086 |       |       | 0.263 |       |       |
| Sordariomycetes | Hypocreales   | Nectriaceae           | <i>Fusarium</i>       | <i>Fusarium brachygibbosum</i>        |       |       |       |       | 0.043 |       |       |       |
| Sordariomycetes | Hypocreales   | Nectriaceae           | <i>Fusarium</i>       | <i>Fusarium solani</i>                |       |       |       |       | 0.572 | 0.405 | 1.96  |       |
| Sordariomycetes | Hypocreales   | Nectriaceae           | <i>Fusarium</i>       | unidentified                          |       |       |       |       |       | 0.25  |       |       |
| Sordariomycetes | Hypocreales   | Nectriaceae           | <i>Nectria</i>        | <i>Nectria bactridioides</i>          | 0.147 |       | 0.147 |       |       |       | 0.118 |       |

|                 |             |                      |                        |                                |       |       |       |       |       |       |       |  |
|-----------------|-------------|----------------------|------------------------|--------------------------------|-------|-------|-------|-------|-------|-------|-------|--|
| Sordariomycetes | Hypocreales | Nectriaceae          | <i>Stylonectria</i>    | unidentified                   |       |       |       |       |       | 0.034 |       |  |
| Sordariomycetes | Hypocreales | Nectriaceae          | <i>Thelonectria</i>    | <i>Thelonectria olida</i>      |       |       |       |       |       |       | 0.027 |  |
| Sordariomycetes | Hypocreales | Nectriaceae          | unidentified           | unidentified                   |       |       |       |       | 0.104 |       |       |  |
| Sordariomycetes | Hypocreales | Ophiocordycipitaceae | <i>Hyaloseta</i>       | <i>Hyaloseta nolinae</i>       |       |       |       |       | 0.012 |       |       |  |
| Sordariomycetes | Hypocreales | Ophiocordycipitaceae | unidentified           | unidentified                   |       |       |       |       |       | 0.074 |       |  |
| Sordariomycetes | Hypocreales | Stachybotryaceae     | <i>Myrothecium</i>     | <i>Myrothecium gramineum</i>   | 0.071 |       | 0.071 | 0.139 |       |       |       |  |
| Sordariomycetes | Hypocreales | Stachybotryaceae     | <i>Myrothecium</i>     | unidentified                   |       |       |       |       |       | 0.081 |       |  |
| Sordariomycetes | Hypocreales | Stachybotryaceae     | <i>Paramyrothecium</i> | <i>Paramyrothecium roridum</i> | 0.062 |       | 0.062 |       | 0.112 |       | 0.167 |  |
| Sordariomycetes | Hypocreales | Stachybotryaceae     | <i>Smaragdiniseta</i>  | <i>Smaragdiniseta bisetosa</i> |       |       |       |       |       | 0.034 |       |  |
| Sordariomycetes | Hypocreales | Stachybotryaceae     | <i>Stachybotrys</i>    | <i>Stachybotrys chartarum</i>  |       |       |       |       | 0.046 |       | 0.129 |  |
| Sordariomycetes | Hypocreales | Stachybotryaceae     | <i>Stachybotrys</i>    | unidentified                   | 0.086 |       | 0.086 |       |       |       |       |  |
| Sordariomycetes | Hypocreales | Stachybotryaceae     | unidentified           | unidentified                   |       |       |       |       |       | 0.067 |       |  |
| Sordariomycetes | Hypocreales | unidentified         | unidentified           | unidentified                   | 0.195 | 1.386 | 0.195 | 0.466 |       | 0.067 |       |  |
| Sordariomycetes | Hypocreales | unidentified         | unidentified           | unidentified                   |       | 0.427 |       | 1.072 |       |       |       |  |
| Sordariomycetes | Hypocreales | unidentified         | unidentified           | unidentified                   |       | 0.869 |       |       |       |       |       |  |
| Sordariomycetes | Hypocreales | unidentified         | unidentified           | unidentified                   | 0.105 |       | 0.105 |       |       |       |       |  |
| Sordariomycetes | Hypocreales | unidentified         | unidentified           | unidentified                   | 0.1   |       | 0.1   |       |       |       |       |  |
| Sordariomycetes | Hypocreales | unidentified         | unidentified           | unidentified                   |       | 0.225 |       |       |       |       |       |  |
| Sordariomycetes | Hypocreales | unidentified         | unidentified           | unidentified                   |       | 0.202 |       |       |       |       |       |  |
| Sordariomycetes | Hypocreales | unidentified         | unidentified           | unidentified                   | 0.024 | 0.082 | 0.024 |       |       |       |       |  |
| Sordariomycetes | Hypocreales | unidentified         | unidentified           | unidentified                   |       | 0.15  |       |       |       |       |       |  |
| Sordariomycetes | Hypocreales | unidentified         | unidentified           | unidentified                   |       | 0.127 |       |       |       |       |       |  |
| Sordariomycetes | Hypocreales | unidentified         | unidentified           | unidentified                   | 0.029 |       | 0.029 |       |       |       |       |  |
| Sordariomycetes | Hypocreales | unidentified         | unidentified           | unidentified                   | 0.029 |       | 0.029 |       |       |       |       |  |
| Sordariomycetes | Hypocreales | unidentified         | unidentified           | unidentified                   | 0.029 |       | 0.029 |       |       |       |       |  |

|                 |             |              |              |              |       |       |       |       |       |       |       |  |
|-----------------|-------------|--------------|--------------|--------------|-------|-------|-------|-------|-------|-------|-------|--|
| Sordariomycetes | Hypocreales | unidentified | unidentified | unidentified | 0.024 |       | 0.024 |       |       |       |       |  |
| Sordariomycetes | Hypocreales | unidentified | unidentified | unidentified |       | 0.067 |       |       |       |       |       |  |
| Sordariomycetes | Hypocreales | unidentified | unidentified | unidentified |       |       |       | 0.089 |       |       |       |  |
| Sordariomycetes | Hypocreales | unidentified | unidentified | unidentified |       | 0.052 |       |       |       |       |       |  |
| Sordariomycetes | Hypocreales | unidentified | unidentified | unidentified | 0.014 |       | 0.014 |       |       |       |       |  |
| Sordariomycetes | Hypocreales | unidentified | unidentified | unidentified |       | 0.045 |       |       |       |       |       |  |
| Sordariomycetes | Hypocreales | unidentified | unidentified | unidentified |       | 0.045 |       |       |       |       |       |  |
| Sordariomycetes | Hypocreales | unidentified | unidentified | unidentified |       | 0.045 |       |       |       |       |       |  |
| Sordariomycetes | Hypocreales | unidentified | unidentified | unidentified |       | 0.037 |       |       |       |       |       |  |
| Sordariomycetes | Hypocreales | unidentified | unidentified | unidentified |       | 0.022 |       |       |       |       |       |  |
| Sordariomycetes | Hypocreales | unidentified | unidentified | unidentified |       |       |       |       | 0.263 |       | 0.682 |  |
| Sordariomycetes | Hypocreales | unidentified | unidentified | unidentified |       |       |       |       | 0.313 |       | 0.424 |  |
| Sordariomycetes | Hypocreales | unidentified | unidentified | unidentified |       |       |       |       |       | 0.729 | 0.22  |  |
| Sordariomycetes | Hypocreales | unidentified | unidentified | unidentified |       |       |       |       |       | 0.513 |       |  |
| Sordariomycetes | Hypocreales | unidentified | unidentified | unidentified |       |       |       |       |       |       | 0.317 |  |
| Sordariomycetes | Hypocreales | unidentified | unidentified | unidentified |       |       |       |       |       | 0.034 | 0.285 |  |
| Sordariomycetes | Hypocreales | unidentified | unidentified | unidentified |       |       |       |       |       |       | 0.285 |  |
| Sordariomycetes | Hypocreales | unidentified | unidentified | unidentified |       |       |       |       |       |       | 0.118 |  |
| Sordariomycetes | Hypocreales | unidentified | unidentified | unidentified |       |       |       |       |       | 0.135 |       |  |
| Sordariomycetes | Hypocreales | unidentified | unidentified | unidentified |       |       |       |       |       |       | 0.086 |  |
| Sordariomycetes | Hypocreales | unidentified | unidentified | unidentified |       |       |       |       |       |       | 0.081 |  |
| Sordariomycetes | Hypocreales | unidentified | unidentified | unidentified |       |       |       |       |       | 0.094 |       |  |
| Sordariomycetes | Hypocreales | unidentified | unidentified | unidentified |       |       |       |       |       | 0.074 |       |  |
| Sordariomycetes | Hypocreales | unidentified | unidentified | unidentified |       |       |       |       |       |       | 0.048 |  |
| Sordariomycetes | Hypocreales | unidentified | unidentified | unidentified |       |       |       |       |       |       | 0.048 |  |
| Sordariomycetes | Hypocreales | unidentified | unidentified | unidentified |       |       |       |       |       | 0.061 |       |  |
| Sordariomycetes | Hypocreales | unidentified | unidentified | unidentified |       |       |       |       | 0.031 |       |       |  |
| Sordariomycetes | Hypocreales | unidentified | unidentified | unidentified |       |       |       |       | 0.027 |       |       |  |

|                 |                                  |                                  |                         |                                   |       |       |       |  |       |       |       |       |
|-----------------|----------------------------------|----------------------------------|-------------------------|-----------------------------------|-------|-------|-------|--|-------|-------|-------|-------|
| Sordariomycetes | Hypocreales                      | unidentified                     | unidentified            | unidentified                      |       |       |       |  | 0.027 |       |       |       |
| Sordariomycetes | Hypocreales                      | unidentified                     | unidentified            | unidentified                      |       |       |       |  |       | 0.04  |       |       |
| Sordariomycetes | Hypocreales                      | unidentified                     | unidentified            | unidentified                      |       |       |       |  | 0.019 |       |       |       |
| Sordariomycetes | Magnaporthales                   | Magnaporthaceae                  | <i>Mycoleptodiscus</i>  | unidentified                      |       |       |       |  |       | 0.601 |       |       |
| Sordariomycetes | Microascales                     | Microascaceae                    | <i>Pseudallescheria</i> | unidentified                      |       |       |       |  |       |       |       | 0.429 |
| Sordariomycetes | Microascales                     | Microascaceae                    | <i>Pseudallescheria</i> | unidentified                      |       |       |       |  |       | 0.027 |       |       |
| Sordariomycetes | Myrmecridiales                   | Myrmecridiaceae                  | <i>Myrmecridium</i>     | <i>Myrmecridium phragmitis</i>    |       | 0.075 |       |  |       |       |       |       |
| Sordariomycetes | Pleurotheciales                  | Pleurotheciaceae                 | <i>Phaeoisaria</i>      | <i>Phaeoisaria sedimenticola</i>  |       |       |       |  |       |       | 0.054 |       |
| Sordariomycetes | Pleurotheciales                  | Pleurotheciaceae                 | <i>Phaeoisaria</i>      | unidentified                      |       |       |       |  |       | 0.013 |       |       |
| Sordariomycetes | Pleurotheciales                  | Pleurotheciaceae                 | <i>Pleurotheciella</i>  | <i>Pleurotheciella uniseptata</i> |       |       |       |  | 0.046 | 0.02  |       |       |
| Sordariomycetes | Savoryellales                    | unidentified                     | unidentified            | unidentified                      |       |       |       |  |       | 0.04  |       |       |
| Sordariomycetes | Sordariales                      | Chaetomiaceae                    | <i>Chaetomium</i>       | unidentified                      |       |       |       |  | 0.054 | 1.39  |       |       |
| Sordariomycetes | Sordariales                      | Chaetomiaceae                    | <i>Chaetomium</i>       | unidentified                      |       |       |       |  |       |       | 0.129 |       |
| Sordariomycetes | Sordariales                      | Chaetomiaceae                    | <i>Chaetomium</i>       | unidentified                      |       |       |       |  | 0.081 |       |       |       |
| Sordariomycetes | Sordariales                      | Chaetomiaceae                    | <i>Chaetomium</i>       | unidentified                      |       |       |       |  | 0.027 |       | 0.027 |       |
| Sordariomycetes | Sordariales                      | Chaetomiaceae                    | <i>Chaetomium</i>       | unidentified                      |       |       |       |  |       | 0.067 |       |       |
| Sordariomycetes | Sordariales                      | Chaetomiaceae                    | <i>Thielavia</i>        | unidentified                      |       |       |       |  |       | 0.25  |       |       |
| Sordariomycetes | Sordariales                      | Chaetomiaceae                    | unidentified            | unidentified                      |       |       |       |  | 1.446 | 2.133 | 0.295 |       |
| Sordariomycetes | Sordariales                      | Chaetomiaceae                    | unidentified            | unidentified                      |       |       |       |  | 0.97  |       | 2.095 |       |
| Sordariomycetes | Sordariales                      | Chaetomiaceae                    | unidentified            | unidentified                      |       |       |       |  |       |       | 0.124 |       |
| Sordariomycetes | Sordariales                      | Lasiosphaeriaceae                | unidentified            | unidentified                      |       |       |       |  | 0.158 |       |       |       |
| Sordariomycetes | Sordariales                      | Sordariaceae                     | <i>Gelasinospora</i>    | <i>Gelasinospora cratophora</i>   |       |       |       |  | 0.085 |       |       |       |
| Sordariomycetes | Sordariales                      | Sordariales <i>Inc. sed.</i>     | <i>Monosporascus</i>    | <i>Monosporascus cannonballus</i> | 0.124 |       | 0.124 |  |       | 0.034 | 0.274 |       |
| Sordariomycetes | Sordariales                      | unidentified                     | unidentified            | unidentified                      |       |       |       |  | 0.023 |       |       |       |
| Sordariomycetes | Sordariomycetes <i>Inc. sed.</i> | Sordariomycetes <i>Inc. sed.</i> | <i>Ciliochorella</i>    | unidentified                      |       |       |       |  | 0.062 |       |       |       |

|                 |                   |                    |                   |                          |       |       |       |       |       |       |       |        |
|-----------------|-------------------|--------------------|-------------------|--------------------------|-------|-------|-------|-------|-------|-------|-------|--------|
| Sordariomycetes | Trichosphaeriales | Trichosphaeriaceae | <i>Nigrospora</i> | <i>Nigrospora oryzae</i> | 0.057 |       | 0.057 | 0.079 |       |       |       | 22.076 |
| Sordariomycetes | unidentified      | unidentified       | unidentified      | unidentified             |       |       |       | 2.024 |       |       |       |        |
| Sordariomycetes | unidentified      | unidentified       | unidentified      | unidentified             | 0.128 | 0.105 | 0.128 |       |       | 0.101 |       |        |
| Sordariomycetes | unidentified      | unidentified       | unidentified      | unidentified             | 0.119 |       | 0.119 |       |       |       |       |        |
| Sordariomycetes | unidentified      | unidentified       | unidentified      | unidentified             | 0.081 |       | 0.081 |       |       |       |       |        |
| Sordariomycetes | unidentified      | unidentified       | unidentified      | unidentified             |       |       |       | 0.089 |       |       |       |        |
| Sordariomycetes | unidentified      | unidentified       | unidentified      | unidentified             | 0.019 |       | 0.019 |       |       |       |       |        |
| Sordariomycetes | unidentified      | unidentified       | unidentified      | unidentified             |       | 0.06  |       |       |       |       |       |        |
| Sordariomycetes | unidentified      | unidentified       | unidentified      | unidentified             | 0.014 |       | 0.014 |       |       |       |       |        |
| Sordariomycetes | unidentified      | unidentified       | unidentified      | unidentified             |       |       |       | 0.03  |       |       |       |        |
| Sordariomycetes | unidentified      | unidentified       | unidentified      | unidentified             |       |       |       | 0.03  |       |       |       |        |
| Sordariomycetes | unidentified      | unidentified       | unidentified      | unidentified             |       | 0.015 |       |       |       |       |       |        |
| Sordariomycetes | unidentified      | unidentified       | unidentified      | unidentified             |       |       |       |       | 0.081 |       |       |        |
| Sordariomycetes | unidentified      | unidentified       | unidentified      | unidentified             |       |       |       |       | 0.077 |       |       |        |
| Sordariomycetes | unidentified      | unidentified       | unidentified      | unidentified             |       |       |       |       |       |       | 0.107 |        |
| Sordariomycetes | unidentified      | unidentified       | unidentified      | unidentified             |       |       |       |       | 0.073 |       |       |        |
| Sordariomycetes | unidentified      | unidentified       | unidentified      | unidentified             |       |       |       |       |       | 0.121 |       |        |
| Sordariomycetes | unidentified      | unidentified       | unidentified      | unidentified             |       |       |       |       |       |       | 0.091 |        |
| Sordariomycetes | unidentified      | unidentified       | unidentified      | unidentified             |       |       |       |       | 0.046 |       |       |        |
| Sordariomycetes | unidentified      | unidentified       | unidentified      | unidentified             |       |       |       |       |       |       | 0.059 |        |
| Sordariomycetes | unidentified      | unidentified       | unidentified      | unidentified             |       |       |       |       | 0.035 |       |       |        |
| Sordariomycetes | unidentified      | unidentified       | unidentified      | unidentified             |       |       |       |       |       | 0.054 |       |        |
| Sordariomycetes | unidentified      | unidentified       | unidentified      | unidentified             |       |       |       |       | 0.027 |       |       |        |
| Sordariomycetes | unidentified      | unidentified       | unidentified      | unidentified             |       |       |       |       |       | 0.047 |       |        |
| Sordariomycetes | unidentified      | unidentified       | unidentified      | unidentified             |       |       |       |       |       |       | 0.038 |        |
| Sordariomycetes | unidentified      | unidentified       | unidentified      | unidentified             |       |       |       |       |       |       |       | 0.126  |
| Sordariomycetes | unidentified      | unidentified       | unidentified      | unidentified             |       |       |       |       |       | 0.034 |       |        |
| Sordariomycetes | unidentified      | unidentified       | unidentified      | unidentified             |       |       |       |       |       |       | 0.021 |        |

|                 |              |                   |                       |                                  |       |       |       |       |       |       |       |  |
|-----------------|--------------|-------------------|-----------------------|----------------------------------|-------|-------|-------|-------|-------|-------|-------|--|
| Sordariomycetes | unidentified | unidentified      | unidentified          | unidentified                     |       |       |       |       |       | 0.02  |       |  |
| Sordariomycetes | unidentified | unidentified      | unidentified          | unidentified                     |       |       |       |       |       |       | 0.011 |  |
| Sordariomycetes | Xylariales   | Amphisphaeriaceae | <i>Lepteutypa</i>     | <i>Lepteutypa sambuci</i>        |       |       |       |       |       |       | 0.038 |  |
| Sordariomycetes | Xylariales   | Bartaliniaceae    | <i>Bartalinia</i>     | unidentified                     |       |       |       |       | 0.031 |       |       |  |
| Sordariomycetes | Xylariales   | Beltraniaceae     | <i>Beltraniella</i>   | unidentified                     |       |       |       |       |       | 0.121 |       |  |
| Sordariomycetes | Xylariales   | Beltraniaceae     | <i>Beltraniella</i>   | unidentified                     |       |       |       |       | 0.054 |       |       |  |
| Sordariomycetes | Xylariales   | Diatrypaceae      | <i>Peroneutypa</i>    | <i>Peroneutypa alsophila</i>     |       |       |       | 0.02  |       |       |       |  |
| Sordariomycetes | Xylariales   | Diatrypaceae      | <i>Peroneutypa</i>    | <i>Peroneutypa scoparia</i>      |       |       |       | 0.099 |       |       |       |  |
| Sordariomycetes | Xylariales   | Sporocadaceae     | <i>Pestalotiopsis</i> | <i>Pestalotiopsis microspora</i> |       |       |       |       |       | 0.054 |       |  |
| Sordariomycetes | Xylariales   | Sporocadaceae     | <i>Pestalotiopsis</i> | unidentified                     | 0.223 | 0.532 | 0.223 |       |       | 0.094 |       |  |
| Sordariomycetes | Xylariales   | Sporocadaceae     | <i>Pestalotiopsis</i> | unidentified                     |       |       |       | 0.06  |       |       |       |  |
| Sordariomycetes | Xylariales   | unidentified      | unidentified          | unidentified                     | 0.062 |       | 0.062 |       |       |       |       |  |
| Sordariomycetes | Xylariales   | unidentified      | unidentified          | unidentified                     | 0.057 |       | 0.057 |       |       |       |       |  |
| Sordariomycetes | Xylariales   | unidentified      | unidentified          | unidentified                     | 0.048 |       | 0.048 |       |       |       |       |  |
| Sordariomycetes | Xylariales   | unidentified      | unidentified          | unidentified                     |       | 0.075 |       |       |       |       |       |  |
| Sordariomycetes | Xylariales   | unidentified      | unidentified          | unidentified                     |       | 0.067 |       |       |       |       |       |  |
| Sordariomycetes | Xylariales   | unidentified      | unidentified          | unidentified                     | 0.014 |       | 0.014 |       |       |       |       |  |
| Sordariomycetes | Xylariales   | unidentified      | unidentified          | unidentified                     |       |       |       | 0.04  |       |       |       |  |
| Sordariomycetes | Xylariales   | unidentified      | unidentified          | unidentified                     |       |       |       |       |       |       | 0.091 |  |
| Sordariomycetes | Xylariales   | unidentified      | unidentified          | unidentified                     |       |       |       |       |       | 0.108 |       |  |
| Sordariomycetes | Xylariales   | unidentified      | unidentified          | unidentified                     |       |       |       |       | 0.043 |       |       |  |
| Sordariomycetes | Xylariales   | Xylariaceae       | <i>Daldinia</i>       | unidentified                     | 0.105 |       | 0.105 |       |       |       |       |  |
| Sordariomycetes | Xylariales   | Xylariaceae       | <i>Hypoxylon</i>      | <i>Hypoxylon haematostroma</i>   | 0.062 | 0.06  | 0.062 |       | 0.027 |       |       |  |
| Sordariomycetes | Xylariales   | Xylariaceae       | <i>Hypoxylon</i>      | <i>Hypoxylon monticulosum</i>    |       |       |       | 0.06  |       |       |       |  |
| Sordariomycetes | Xylariales   | Xylariaceae       | <i>Hypoxylon</i>      | <i>Hypoxylon musceum</i>         | 0.019 | 0.067 | 0.019 | 0.069 |       |       |       |  |

|                 |              |                             |                      |                             |       |       |       |       |       |       |       |  |
|-----------------|--------------|-----------------------------|----------------------|-----------------------------|-------|-------|-------|-------|-------|-------|-------|--|
| Sordariomycetes | Xylariales   | Xylariaceae                 | <i>Hypoxylon</i>     | unidentified                | 0.086 |       | 0.086 |       |       |       |       |  |
| Sordariomycetes | Xylariales   | Xylariaceae                 | <i>Hypoxylon</i>     | unidentified                | 0.052 | 0.045 | 0.052 |       |       |       |       |  |
| Sordariomycetes | Xylariales   | Xylariaceae                 | <i>Hypoxylon</i>     | unidentified                | 0.043 |       | 0.043 |       |       |       |       |  |
| Sordariomycetes | Xylariales   | Xylariaceae                 | <i>Hypoxylon</i>     | unidentified                |       |       |       | 0.159 |       |       |       |  |
| Sordariomycetes | Xylariales   | Xylariaceae                 | <i>Hypoxylon</i>     | unidentified                | 0.019 |       | 0.019 |       |       |       |       |  |
| Sordariomycetes | Xylariales   | Xylariaceae                 | unidentified         | unidentified                | 0.556 | 0.457 | 0.556 | 0.129 | 0.023 | 0.054 |       |  |
| Sordariomycetes | Xylariales   | Xylariaceae                 | unidentified         | unidentified                | 0.057 |       | 0.057 |       |       |       |       |  |
| Sordariomycetes | Xylariales   | Xylariaceae                 | unidentified         | unidentified                |       |       |       | 0.099 |       |       |       |  |
| Sordariomycetes | Xylariales   | Xylariaceae                 | unidentified         | unidentified                |       | 0.022 |       |       |       |       |       |  |
| Sordariomycetes | Xylariales   | Xylariaceae                 | unidentified         | unidentified                |       |       |       |       | 0.012 | 0.013 | 0.081 |  |
| Sordariomycetes | Xylariales   | Xylariaceae                 | unidentified         | unidentified                |       |       |       |       | 0.031 |       |       |  |
| Sordariomycetes | Xylariales   | Xylariaceae                 | <i>Xylaria</i>       | unidentified                | 0.052 |       | 0.052 |       |       |       |       |  |
| Sordariomycetes | Xylariales   | Xylariaceae                 | <i>Xylaria</i>       | unidentified                |       | 0.052 |       |       |       |       |       |  |
| Sordariomycetes | Xylariales   | Xylariaceae                 | <i>Xylaria</i>       | unidentified                | 0.014 |       | 0.014 |       |       |       |       |  |
| Sordariomycetes | Xylariales   | Xylariaceae                 | <i>Xylaria</i>       | unidentified                |       |       |       | 0.04  |       |       |       |  |
| Sordariomycetes | Xylariales   | Xylariaceae                 | <i>Xylaria</i>       | unidentified                |       |       |       |       |       |       | 0.258 |  |
| Sordariomycetes | Xylariales   | Xylariaceae                 | <i>Xylaria</i>       | <i>Xylaria apiculata</i>    |       |       |       |       | 1.14  |       |       |  |
| Sordariomycetes | Xylariales   | Xylariaceae                 | <i>Xylaria</i>       | <i>Xylaria longipes</i>     | 0.033 |       | 0.033 | 0.06  |       |       |       |  |
| Sordariomycetes | Xylariales   | Xylariales <i>Inc. sed.</i> | <i>Castanediella</i> | <i>Castanediella ramosa</i> |       |       |       |       |       |       | 0.124 |  |
| Sordariomycetes | Xylariales   | Xylariales <i>Inc. sed.</i> | <i>Robillarda</i>    | unidentified                |       |       |       |       |       | 0.094 |       |  |
| unidentified    | unidentified | unidentified                | unidentified         | unidentified                | 1.041 | 0.112 | 1.041 |       |       |       |       |  |
| unidentified    | unidentified | unidentified                | unidentified         | unidentified                | 0.456 | 0.794 | 0.456 |       |       |       |       |  |
| unidentified    | unidentified | unidentified                | unidentified         | unidentified                | 0.528 | 0.322 | 0.528 | 0.228 |       |       |       |  |
| unidentified    | unidentified | unidentified                | unidentified         | unidentified                | 0.499 | 0.292 | 0.499 |       |       |       |       |  |
| unidentified    | unidentified | unidentified                | unidentified         | unidentified                | 0.566 |       | 0.566 |       |       |       |       |  |
| unidentified    | unidentified | unidentified                | unidentified         | unidentified                | 0.285 | 0.135 | 0.285 |       |       |       |       |  |
| unidentified    | unidentified | unidentified                | unidentified         | unidentified                |       |       |       | 1.211 |       |       |       |  |

|              |              |              |              |              |       |       |       |       |       |  |       |  |
|--------------|--------------|--------------|--------------|--------------|-------|-------|-------|-------|-------|--|-------|--|
| unidentified | unidentified | unidentified | unidentified | unidentified | 0.086 | 0.12  | 0.086 | 0.109 |       |  |       |  |
| unidentified | unidentified | unidentified | unidentified | unidentified | 0.138 |       | 0.138 |       |       |  |       |  |
| unidentified | unidentified | unidentified | unidentified | unidentified |       |       |       | 0.496 |       |  |       |  |
| unidentified | unidentified | unidentified | unidentified | unidentified | 0.09  | 0.045 | 0.09  |       |       |  |       |  |
| unidentified | unidentified | unidentified | unidentified | unidentified | 0.1   |       | 0.1   |       |       |  |       |  |
| unidentified | unidentified | unidentified | unidentified | unidentified | 0.095 |       | 0.095 |       | 0.058 |  | 0.252 |  |
| unidentified | unidentified | unidentified | unidentified | unidentified |       |       |       | 0.377 |       |  |       |  |
| unidentified | unidentified | unidentified | unidentified | unidentified |       |       |       | 0.288 | 0.201 |  |       |  |
| unidentified | unidentified | unidentified | unidentified | unidentified | 0.029 | 0.097 | 0.029 |       |       |  |       |  |
| unidentified | unidentified | unidentified | unidentified | unidentified |       |       |       | 0.189 |       |  |       |  |
| unidentified | unidentified | unidentified | unidentified | unidentified | 0.043 |       | 0.043 |       |       |  |       |  |
| unidentified | unidentified | unidentified | unidentified | unidentified |       | 0.112 |       | 0.02  |       |  |       |  |
| unidentified | unidentified | unidentified | unidentified | unidentified | 0.038 |       | 0.038 |       |       |  |       |  |
| unidentified | unidentified | unidentified | unidentified | unidentified | 0.038 |       | 0.038 |       |       |  |       |  |
| unidentified | unidentified | unidentified | unidentified | unidentified | 0.038 |       | 0.038 |       |       |  |       |  |
| unidentified | unidentified | unidentified | unidentified | unidentified | 0.038 |       | 0.038 |       |       |  |       |  |
| unidentified | unidentified | unidentified | unidentified | unidentified |       | 0.112 |       |       |       |  |       |  |
| unidentified | unidentified | unidentified | unidentified | unidentified | 0.033 |       | 0.033 |       |       |  |       |  |
| unidentified | unidentified | unidentified | unidentified | unidentified | 0.033 |       | 0.033 |       |       |  |       |  |
| unidentified | unidentified | unidentified | unidentified | unidentified |       |       |       | 0.129 |       |  | 0.038 |  |
| unidentified | unidentified | unidentified | unidentified | unidentified | 0.029 |       | 0.029 |       |       |  |       |  |
| unidentified | unidentified | unidentified | unidentified | unidentified |       |       |       | 0.089 |       |  |       |  |
| unidentified | unidentified | unidentified | unidentified | unidentified | 0.019 |       | 0.019 |       |       |  |       |  |
| unidentified | unidentified | unidentified | unidentified | unidentified |       | 0.06  |       |       |       |  |       |  |
| unidentified | unidentified | unidentified | unidentified | unidentified |       |       |       | 0.04  |       |  |       |  |
| unidentified | unidentified | unidentified | unidentified | unidentified |       | 0.022 |       |       |       |  |       |  |
| unidentified | unidentified | unidentified | unidentified | unidentified |       |       |       | 0.03  |       |  |       |  |
| unidentified | unidentified | unidentified | unidentified | unidentified |       |       |       | 0.03  |       |  |       |  |

|                      |              |              |                 |                              |  |       |  |      |       |       |       |       |
|----------------------|--------------|--------------|-----------------|------------------------------|--|-------|--|------|-------|-------|-------|-------|
| unidentified         | unidentified | unidentified | unidentified    | unidentified                 |  | 0.015 |  |      |       |       |       |       |
| unidentified         | unidentified | unidentified | unidentified    | unidentified                 |  |       |  | 0.02 |       |       |       |       |
| unidentified         | unidentified | unidentified | unidentified    | unidentified                 |  |       |  | 0.02 |       |       |       |       |
| unidentified         | unidentified | unidentified | unidentified    | unidentified                 |  |       |  |      |       | 0.337 |       |       |
| unidentified         | unidentified | unidentified | unidentified    | unidentified                 |  |       |  |      | 0.046 | 0.142 |       |       |
| unidentified         | unidentified | unidentified | unidentified    | unidentified                 |  |       |  |      |       |       |       | 0.808 |
| unidentified         | unidentified | unidentified | unidentified    | unidentified                 |  |       |  |      |       |       | 0.134 |       |
| unidentified         | unidentified | unidentified | unidentified    | unidentified                 |  |       |  |      |       | 0.162 |       |       |
| unidentified         | unidentified | unidentified | unidentified    | unidentified                 |  |       |  |      | 0.05  | 0.054 | 0.011 |       |
| unidentified         | unidentified | unidentified | unidentified    | unidentified                 |  |       |  |      |       | 0.142 |       |       |
| unidentified         | unidentified | unidentified | unidentified    | unidentified                 |  |       |  |      |       |       | 0.097 |       |
| unidentified         | unidentified | unidentified | unidentified    | unidentified                 |  |       |  |      | 0.046 |       |       |       |
| unidentified         | unidentified | unidentified | unidentified    | unidentified                 |  |       |  |      | 0.039 |       |       |       |
| unidentified         | unidentified | unidentified | unidentified    | unidentified                 |  |       |  |      |       | 0.061 |       |       |
| unidentified         | unidentified | unidentified | unidentified    | unidentified                 |  |       |  |      |       | 0.061 |       |       |
| unidentified         | unidentified | unidentified | unidentified    | unidentified                 |  |       |  |      | 0.023 |       |       |       |
| unidentified         | unidentified | unidentified | unidentified    | unidentified                 |  |       |  |      |       | 0.034 |       |       |
| unidentified         | unidentified | unidentified | unidentified    | unidentified                 |  |       |  |      |       | 0.034 |       |       |
| unidentified         | unidentified | unidentified | unidentified    | unidentified                 |  |       |  |      |       |       | 0.027 |       |
| unidentified         | unidentified | unidentified | unidentified    | unidentified                 |  |       |  |      |       | 0.027 |       |       |
| unidentified         | unidentified | unidentified | unidentified    | unidentified                 |  |       |  |      | 0.012 |       |       |       |
| unidentified         | unidentified | unidentified | unidentified    | unidentified                 |  |       |  |      |       | 0.02  |       |       |
| unidentified         | unidentified | unidentified | unidentified    | unidentified                 |  |       |  |      |       |       | 0.016 |       |
| unidentified         | unidentified | unidentified | unidentified    | unidentified                 |  |       |  |      |       |       | 0.016 |       |
| unidentified         | unidentified | unidentified | unidentified    | unidentified                 |  |       |  |      | 0.012 |       |       |       |
| <b>Basidiomycota</b> |              |              |                 |                              |  |       |  |      |       |       |       |       |
| Agaricomycetes       | Agaricales   | Agaricaceae  | <i>Agaricus</i> | <i>Agaricus subrufescens</i> |  |       |  | 0.04 |       |       |       |       |

|                |            |                |                      |                                    |       |  |       |       |       |        |       |  |
|----------------|------------|----------------|----------------------|------------------------------------|-------|--|-------|-------|-------|--------|-------|--|
| Agaricomycetes | Agaricales | Agaricaceae    | <i>Agaricus</i>      | unidentified                       |       |  |       | 0.129 |       |        |       |  |
| Agaricomycetes | Agaricales | Agaricaceae    | <i>Agaricus</i>      | unidentified                       |       |  |       |       |       | 0.034  |       |  |
| Agaricomycetes | Agaricales | Agaricaceae    | <i>Lepiota</i>       | <i>Lepiota felina</i>              |       |  |       |       | 0.085 |        |       |  |
| Agaricomycetes | Agaricales | Agaricaceae    | <i>Lepiota</i>       | <i>Lepiota flammeotincta</i>       |       |  |       |       | 0.027 |        |       |  |
| Agaricomycetes | Agaricales | Agaricaceae    | <i>Lepiota</i>       | unidentified                       | 0.01  |  | 0.01  |       |       |        |       |  |
| Agaricomycetes | Agaricales | Agaricaceae    | <i>Lepiota</i>       | unidentified                       |       |  |       |       |       | 10.996 |       |  |
| Agaricomycetes | Agaricales | Agaricaceae    | <i>Leucoagaricus</i> | <i>Leucoagaricus brunnescens</i>   |       |  |       | 0.119 |       |        |       |  |
| Agaricomycetes | Agaricales | Agaricaceae    | <i>Leucoagaricus</i> | <i>Leucoagaricus rubrotinctus</i>  |       |  |       |       |       |        | 0.102 |  |
| Agaricomycetes | Agaricales | Agaricaceae    | <i>Leucoagaricus</i> | <i>Leucoagaricus viriditinctus</i> |       |  |       |       |       |        | 0.054 |  |
| Agaricomycetes | Agaricales | Agaricaceae    | <i>Leucoagaricus</i> | unidentified                       |       |  |       |       |       | 0.061  |       |  |
| Agaricomycetes | Agaricales | Agaricaceae    | unidentified         | unidentified                       |       |  |       |       |       |        | 0.381 |  |
| Agaricomycetes | Agaricales | Agaricaceae    | unidentified         | unidentified                       |       |  |       |       |       |        | 0.193 |  |
| Agaricomycetes | Agaricales | Agaricaceae    | unidentified         | unidentified                       |       |  |       |       |       |        | 0.048 |  |
| Agaricomycetes | Agaricales | Agaricaceae    | unidentified         | unidentified                       |       |  |       |       |       |        | 0.048 |  |
| Agaricomycetes | Agaricales | Agaricaceae    | unidentified         | unidentified                       |       |  |       |       | 0.027 |        |       |  |
| Agaricomycetes | Agaricales | Agaricaceae    | unidentified         | unidentified                       |       |  |       |       |       | 0.013  |       |  |
| Agaricomycetes | Agaricales | Bolbitiaceae   | <i>Conocybe</i>      | <i>Conocybe volvata</i>            |       |  |       |       |       | 0.027  |       |  |
| Agaricomycetes | Agaricales | Bolbitiaceae   | <i>Panaeolus</i>     | <i>Panaeolus papilionaceus</i>     |       |  |       |       |       | 0.013  |       |  |
| Agaricomycetes | Agaricales | Cortinariaceae | <i>Gymnopilus</i>    | unidentified                       | 0.014 |  | 0.014 |       |       |        |       |  |
| Agaricomycetes | Agaricales | Entolomataceae | <i>Clitopilus</i>    | unidentified                       |       |  |       | 0.139 |       |        |       |  |
| Agaricomycetes | Agaricales | Entolomataceae | <i>Clitopilus</i>    | unidentified                       | 0.01  |  | 0.01  | 0.03  |       |        |       |  |
| Agaricomycetes | Agaricales | Entolomataceae | <i>Clitopilus</i>    | unidentified                       |       |  |       |       |       | 0.236  |       |  |
| Agaricomycetes | Agaricales | Entolomataceae | <i>Clitopilus</i>    | unidentified                       |       |  |       |       |       | 0.135  |       |  |
| Agaricomycetes | Agaricales | Entolomataceae | <i>Clitopilus</i>    | unidentified                       |       |  |       |       |       | 0.054  |       |  |
| Agaricomycetes | Agaricales | Hygrophoraceae | <i>Hygrocybe</i>     | unidentified                       |       |  |       |       |       | 0.574  |       |  |

|                |            |                 |                       |                                  |       |       |       |       |       |       |       |       |
|----------------|------------|-----------------|-----------------------|----------------------------------|-------|-------|-------|-------|-------|-------|-------|-------|
| Agaricomycetes | Agaricales | Lycoperdaceae   | <i>Lycoperdon</i>     | unidentified                     |       |       |       |       | 0.035 |       |       |       |
| Agaricomycetes | Agaricales | Lyophyllaceae   | <i>Gerhardtia</i>     | unidentified                     |       |       |       |       |       | 0.04  |       |       |
| Agaricomycetes | Agaricales | Marasmiaceae    | <i>Campanella</i>     | unidentified                     |       | 0.037 |       |       |       |       |       |       |
| Agaricomycetes | Agaricales | Marasmiaceae    | <i>Marasmius</i>      | <i>Marasmius corrugatiformis</i> |       |       |       |       |       |       | 0.032 |       |
| Agaricomycetes | Agaricales | Marasmiaceae    | <i>Marasmius</i>      | <i>Marasmius ferruginoides</i>   |       |       |       |       | 0.039 |       |       |       |
| Agaricomycetes | Agaricales | Marasmiaceae    | <i>Marasmius</i>      | unidentified                     | 0.01  |       | 0.01  |       |       |       |       |       |
| Agaricomycetes | Agaricales | Marasmiaceae    | <i>Marasmius</i>      | unidentified                     |       |       |       | 0.02  |       |       |       |       |
| Agaricomycetes | Agaricales | Marasmiaceae    | <i>Marasmius</i>      | unidentified                     |       |       |       |       |       | 0.128 |       |       |
| Agaricomycetes | Agaricales | Marasmiaceae    | <i>Marasmius</i>      | unidentified                     |       |       |       |       |       | 0.054 |       |       |
| Agaricomycetes | Agaricales | Marasmiaceae    | <i>Marasmius</i>      | unidentified                     |       |       |       |       |       | 0.013 |       |       |
| Agaricomycetes | Agaricales | Marasmiaceae    | <i>Moniliophthora</i> | <i>Moniliophthora canescens</i>  |       |       |       |       |       |       | 0.064 |       |
| Agaricomycetes | Agaricales | Marasmiaceae    | <i>Moniliophthora</i> | <i>Moniliophthora perniciosa</i> |       |       |       |       | 0.375 | 0.142 |       |       |
| Agaricomycetes | Agaricales | Marasmiaceae    | <i>Tetrapyrgos</i>    | <i>Tetrapyrgos nigripes</i>      |       |       |       |       |       |       | 0.747 |       |
| Agaricomycetes | Agaricales | Marasmiaceae    | unidentified          | unidentified                     |       |       |       |       |       | 0.155 |       |       |
| Agaricomycetes | Agaricales | Marasmiaceae    | unidentified          | unidentified                     |       |       |       |       |       | 0.101 |       |       |
| Agaricomycetes | Agaricales | Omphalotaceae   | <i>Marasmiellus</i>   | <i>Marasmiellus candidus</i>     | 0.01  |       | 0.01  |       | 0.012 | 0.634 |       | 1.364 |
| Agaricomycetes | Agaricales | Omphalotaceae   | <i>Marasmiellus</i>   | unidentified                     |       |       |       |       |       |       | 0.097 |       |
| Agaricomycetes | Agaricales | Omphalotaceae   | <i>Marasmiellus</i>   | unidentified                     |       |       |       |       |       |       | 0.043 |       |
| Agaricomycetes | Agaricales | Pluteaceae      | <i>Pluteus</i>        | <i>Pluteus heteromarginatus</i>  |       |       |       | 0.06  |       |       | 0.07  |       |
| Agaricomycetes | Agaricales | Pluteaceae      | <i>Pluteus</i>        | unidentified                     |       |       |       |       | 0.066 |       |       |       |
| Agaricomycetes | Agaricales | Pluteaceae      | <i>Pluteus</i>        | unidentified                     |       |       |       |       |       | 0.054 |       |       |
| Agaricomycetes | Agaricales | Psathyrellaceae | <i>Coprinellus</i>    | <i>Coprinellus radians</i>       | 0.033 |       | 0.033 |       |       |       |       |       |
| Agaricomycetes | Agaricales | Psathyrellaceae | <i>Coprinellus</i>    | unidentified                     |       |       |       |       |       |       | 0.011 |       |
| Agaricomycetes | Agaricales | Psathyrellaceae | <i>Coprinopsis</i>    | <i>Coprinopsis clastophylla</i>  |       |       |       | 0.169 |       |       |       |       |

|                |            |                   |                    |                                |       |      |       |       |       |       |       |  |
|----------------|------------|-------------------|--------------------|--------------------------------|-------|------|-------|-------|-------|-------|-------|--|
| Agaricomycetes | Agaricales | Psathyrellaceae   | <i>Coprinopsis</i> | <i>Coprinopsis episcopalis</i> |       |      |       |       |       | 0.297 |       |  |
| Agaricomycetes | Agaricales | Psathyrellaceae   | <i>Coprinopsis</i> | unidentified                   | 0.014 |      | 0.014 |       |       |       |       |  |
| Agaricomycetes | Agaricales | Psathyrellaceae   | <i>Parasola</i>    | <i>Parasola kuehneri</i>       |       |      |       |       |       |       | 0.011 |  |
| Agaricomycetes | Agaricales | Psathyrellaceae   | <i>Psathyrella</i> | unidentified                   |       |      |       | 0.109 |       |       |       |  |
| Agaricomycetes | Agaricales | Psathyrellaceae   | <i>Psathyrella</i> | unidentified                   | 0.019 |      | 0.019 |       |       |       |       |  |
| Agaricomycetes | Agaricales | Psathyrellaceae   | <i>Psathyrella</i> | unidentified                   |       |      |       |       |       | 0.196 |       |  |
| Agaricomycetes | Agaricales | Psathyrellaceae   | unidentified       | unidentified                   |       |      |       |       |       | 0.337 |       |  |
| Agaricomycetes | Agaricales | Psathyrellaceae   | unidentified       | unidentified                   |       |      |       |       |       | 0.256 |       |  |
| Agaricomycetes | Agaricales | Stephanosporaceae | <i>Cristinia</i>   | unidentified                   |       |      |       |       |       |       | 0.027 |  |
| Agaricomycetes | Agaricales | Stephanosporaceae | unidentified       | unidentified                   |       |      |       |       |       |       | 0.032 |  |
| Agaricomycetes | Agaricales | unidentified      | unidentified       | unidentified                   | 0.299 | 0.09 | 0.299 | 0.238 |       |       |       |  |
| Agaricomycetes | Agaricales | unidentified      | unidentified       | unidentified                   | 0.019 |      | 0.019 |       |       |       |       |  |
| Agaricomycetes | Agaricales | unidentified      | unidentified       | unidentified                   |       |      |       |       |       | 11.32 |       |  |
| Agaricomycetes | Agaricales | unidentified      | unidentified       | unidentified                   |       |      |       |       | 0.043 | 7.722 |       |  |
| Agaricomycetes | Agaricales | unidentified      | unidentified       | unidentified                   |       |      |       |       |       | 1.89  |       |  |
| Agaricomycetes | Agaricales | unidentified      | unidentified       | unidentified                   |       |      |       |       |       | 0.459 |       |  |
| Agaricomycetes | Agaricales | unidentified      | unidentified       | unidentified                   |       |      |       |       | 0.263 |       |       |  |
| Agaricomycetes | Agaricales | unidentified      | unidentified       | unidentified                   |       |      |       |       | 0.251 |       |       |  |
| Agaricomycetes | Agaricales | unidentified      | unidentified       | unidentified                   |       |      |       |       | 0.22  |       |       |  |
| Agaricomycetes | Agaricales | unidentified      | unidentified       | unidentified                   |       |      |       |       | 0.143 |       |       |  |
| Agaricomycetes | Agaricales | unidentified      | unidentified       | unidentified                   |       |      |       |       |       |       | 0.199 |  |
| Agaricomycetes | Agaricales | unidentified      | unidentified       | unidentified                   |       |      |       |       |       | 0.162 |       |  |
| Agaricomycetes | Agaricales | unidentified      | unidentified       | unidentified                   |       |      |       |       | 0.073 |       |       |  |
| Agaricomycetes | Agaricales | unidentified      | unidentified       | unidentified                   |       |      |       |       |       | 0.081 |       |  |
| Agaricomycetes | Agaricales | unidentified      | unidentified       | unidentified                   |       |      |       |       |       | 0.074 |       |  |
| Agaricomycetes | Agaricales | unidentified      | unidentified       | unidentified                   |       |      |       |       |       |       | 0.043 |  |
| Agaricomycetes | Agaricales | unidentified      | unidentified       | unidentified                   |       |      |       |       |       | 0.034 |       |  |

|                |                |                   |                       |                                |       |      |       |       |       |       |       |       |
|----------------|----------------|-------------------|-----------------------|--------------------------------|-------|------|-------|-------|-------|-------|-------|-------|
| Agaricomycetes | Agaricales     | unidentified      | unidentified          | unidentified                   |       |      |       |       | 0.015 |       |       |       |
| Agaricomycetes | Agaricales     | unidentified      | unidentified          | unidentified                   |       |      |       |       |       |       | 0.021 |       |
| Agaricomycetes | Agaricales     | unidentified      | unidentified          | unidentified                   |       |      |       |       |       |       | 0.021 |       |
| Agaricomycetes | Auriculariales | Aporpiaceae       | <i>Elmerina</i>       | unidentified                   |       |      |       | 0.02  |       |       |       |       |
| Agaricomycetes | Auriculariales | unidentified      | unidentified          | unidentified                   |       |      |       |       | 0.108 |       |       |       |
| Agaricomycetes | Auriculariales | unidentified      | unidentified          | unidentified                   |       |      |       |       |       |       | 0.124 |       |
| Agaricomycetes | Auriculariales | unidentified      | unidentified          | unidentified                   |       |      |       |       |       |       | 0.043 |       |
| Agaricomycetes | Auriculariales | unidentified      | unidentified          | unidentified                   |       |      |       |       |       | 0.013 |       |       |
| Agaricomycetes | Boletales      | Boletaceae        | unidentified          | unidentified                   |       |      |       | 0.06  |       |       |       |       |
| Agaricomycetes | Boletales      | Sclerodermataceae | <i>Scleroderma</i>    | unidentified                   |       |      |       | 0.189 |       |       |       |       |
| Agaricomycetes | Boletales      | unidentified      | unidentified          | unidentified                   |       |      |       | 0.06  |       |       |       |       |
| Agaricomycetes | Cantharellales | Ceratobasidiaceae | <i>Ceratobasidium</i> | unidentified                   |       | 0.24 |       |       |       |       |       |       |
| Agaricomycetes | Cantharellales | Ceratobasidiaceae | <i>Ceratobasidium</i> | unidentified                   | 0.014 |      | 0.014 |       |       |       |       |       |
| Agaricomycetes | Cantharellales | Ceratobasidiaceae | <i>Ceratobasidium</i> | unidentified                   |       |      |       |       |       |       | 1.423 |       |
| Agaricomycetes | Cantharellales | Ceratobasidiaceae | <i>Thanatephorus</i>  | <i>Thanatephorus cucumeris</i> | 0.067 |      | 0.067 |       |       |       | 0.016 |       |
| Agaricomycetes | Cantharellales | Ceratobasidiaceae | <i>Thanatephorus</i>  | unidentified                   |       |      |       |       |       | 0.58  |       | 0.808 |
| Agaricomycetes | Cantharellales | Ceratobasidiaceae | unidentified          | unidentified                   |       |      |       | 0.109 |       |       |       |       |
| Agaricomycetes | Cantharellales | Ceratobasidiaceae | unidentified          | unidentified                   |       |      |       |       |       |       | 1.053 |       |
| Agaricomycetes | Cantharellales | Ceratobasidiaceae | unidentified          | unidentified                   |       |      |       |       | 0.541 |       |       |       |
| Agaricomycetes | Cantharellales | Ceratobasidiaceae | unidentified          | unidentified                   |       |      |       |       |       |       | 0.698 |       |
| Agaricomycetes | Cantharellales | Ceratobasidiaceae | unidentified          | unidentified                   |       |      |       |       |       |       | 0.333 |       |
| Agaricomycetes | Cantharellales | Ceratobasidiaceae | unidentified          | unidentified                   |       |      |       |       |       | 0.101 | 0.145 |       |
| Agaricomycetes | Cantharellales | Ceratobasidiaceae | unidentified          | unidentified                   |       |      |       |       |       |       | 0.167 |       |
| Agaricomycetes | Cantharellales | Ceratobasidiaceae | unidentified          | unidentified                   |       |      |       |       |       | 0.135 |       |       |
| Agaricomycetes | Cantharellales | Ceratobasidiaceae | unidentified          | unidentified                   |       |      |       |       |       | 0.034 |       | 0.278 |
| Agaricomycetes | Cantharellales | Ceratobasidiaceae | unidentified          | unidentified                   |       |      |       |       | 0.05  |       |       |       |
| Agaricomycetes | Cantharellales | Ceratobasidiaceae | unidentified          | unidentified                   |       |      |       |       | 0.043 |       |       |       |



|                |             |                      |                      |                                |       |       |       |       |       |       |       |       |
|----------------|-------------|----------------------|----------------------|--------------------------------|-------|-------|-------|-------|-------|-------|-------|-------|
| Agaricomycetes | Polyporales | Fomitopsidaceae      | <i>Fomitopsis</i>    | unidentified                   |       |       |       |       |       |       |       | 5.633 |
| Agaricomycetes | Polyporales | Ganodermataceae      | <i>Amauroderma</i>   | unidentified                   |       |       |       |       | 0.07  |       |       |       |
| Agaricomycetes | Polyporales | Ganodermataceae      | <i>Ganoderma</i>     | <i>Ganoderma chaliceum</i>     | 0.228 |       | 0.228 | 0.149 | 0.062 |       | 0.22  |       |
| Agaricomycetes | Polyporales | Ganodermataceae      | <i>Ganoderma</i>     | <i>Ganoderma lucidum</i>       |       |       |       |       |       | 0.02  |       |       |
| Agaricomycetes | Polyporales | Ganodermataceae      | unidentified         | unidentified                   |       |       |       | 0.05  |       |       |       |       |
| Agaricomycetes | Polyporales | Phanerochaetaceae    | <i>Efibula</i>       | <i>Efibula clarkii</i>         |       |       |       |       |       |       |       | 3.94  |
| Agaricomycetes | Polyporales | Phanerochaetaceae    | <i>Phanerochaete</i> | unidentified                   |       | 0.03  |       |       |       |       |       |       |
| Agaricomycetes | Polyporales | Phanerochaetaceae    | <i>Phlebiopsis</i>   | <i>Phlebiopsis flavidoalba</i> |       |       |       |       |       |       |       | 1.667 |
| Agaricomycetes | Polyporales | Phanerochaetaceae    | <i>Phlebiopsis</i>   | unidentified                   |       |       |       |       |       |       |       | 2.021 |
| Agaricomycetes | Polyporales | Phanerochaetaceae    | <i>Phlebiopsis</i>   | unidentified                   |       |       |       |       |       |       | 0.027 |       |
| Agaricomycetes | Polyporales | Polyporaceae         | <i>Favolus</i>       | <i>Favolus grammacephalus</i>  |       |       |       |       | 0.019 |       |       | 1.667 |
| Agaricomycetes | Polyporales | Polyporaceae         | <i>Funalia</i>       | <i>Funalia caperata</i>        |       |       |       |       | 0.008 |       |       |       |
| Agaricomycetes | Polyporales | Polyporaceae         | <i>Heliocybe</i>     | <i>Heliocybe sulcata</i>       |       |       |       |       | 0.031 |       |       |       |
| Agaricomycetes | Polyporales | Pterulaceae          | <i>Pterula</i>       | <i>Pterula echo</i>            | 0.076 | 0.082 | 0.076 | 0.119 |       |       |       |       |
| Agaricomycetes | Polyporales | Schizophyllaceae     | <i>Schizophyllum</i> | <i>Schizophyllum commune</i>   |       |       |       |       |       |       |       | 0.253 |
| Agaricomycetes | Polyporales | unidentified         | unidentified         | unidentified                   | 0.01  |       | 0.01  |       |       |       |       |       |
| Agaricomycetes | Polyporales | unidentified         | unidentified         | unidentified                   |       |       |       | 0.03  |       |       |       |       |
| Agaricomycetes | Polyporales | unidentified         | unidentified         | unidentified                   |       |       |       | 0.02  |       |       |       |       |
| Agaricomycetes | Polyporales | unidentified         | unidentified         | unidentified                   |       |       |       |       | 0.008 |       |       | 8.74  |
| Agaricomycetes | Polyporales | unidentified         | unidentified         | unidentified                   |       |       |       |       |       |       |       | 1.44  |
| Agaricomycetes | Polyporales | unidentified         | unidentified         | unidentified                   |       |       |       |       |       | 0.027 |       |       |
| Agaricomycetes | Russulales  | Gloeocystidiellaceae | <i>Laxitextum</i>    | <i>Laxitextum bicolor</i>      |       |       |       | 0.02  |       |       |       |       |
| Agaricomycetes | Russulales  | Peniophoraceae       | <i>Peniophora</i>    | unidentified                   |       |       |       | 0.089 |       |       |       |       |
| Agaricomycetes | Russulales  | Peniophoraceae       | <i>Peniophora</i>    | unidentified                   |       |       |       | 0.04  |       |       |       |       |
| Agaricomycetes | Russulales  | Peniophoraceae       | <i>Peniophora</i>    | unidentified                   |       |       |       |       | 0.093 |       | 0.247 | 2.981 |

|                |                |                |                    |              |       |       |       |       |       |       |       |       |
|----------------|----------------|----------------|--------------------|--------------|-------|-------|-------|-------|-------|-------|-------|-------|
| Agaricomycetes | Russulales     | Peniophoraceae | <i>Peniophora</i>  | unidentified |       |       |       |       |       |       |       | 2.4   |
| Agaricomycetes | Russulales     | Peniophoraceae | <i>Peniophora</i>  | unidentified |       |       |       |       |       |       |       | 0.631 |
| Agaricomycetes | Russulales     | Peniophoraceae | <i>Peniophora</i>  | unidentified |       |       |       |       | 0.043 |       |       |       |
| Agaricomycetes | Russulales     | Peniophoraceae | <i>Peniophora</i>  | unidentified |       |       |       |       | 0.039 |       |       |       |
| Agaricomycetes | Russulales     | Peniophoraceae | <i>Peniophora</i>  | unidentified |       |       |       |       |       |       | 0.054 |       |
| Agaricomycetes | Russulales     | unidentified   | unidentified       | unidentified |       |       |       | 0.129 |       |       |       |       |
| Agaricomycetes | Sebacinales    | Sebacinaceae   | unidentified       | unidentified |       |       |       |       | 0.182 |       |       |       |
| Agaricomycetes | Sebacinales    | Sebacinaceae   | unidentified       | unidentified |       |       |       |       | 0.12  |       |       |       |
| Agaricomycetes | Sebacinales    | Sebacinaceae   | unidentified       | unidentified |       |       |       |       |       | 0.027 |       |       |
| Agaricomycetes | Thelephorales  | Thelephoraceae | unidentified       | unidentified | 0.019 |       | 0.019 |       |       |       |       |       |
| Agaricomycetes | Thelephorales  | Thelephoraceae | unidentified       | unidentified |       | 0.015 |       |       |       |       |       |       |
| Agaricomycetes | Thelephorales  | Thelephoraceae | unidentified       | unidentified |       |       |       |       |       | 0.594 |       |       |
| Agaricomycetes | Thelephorales  | Thelephoraceae | unidentified       | unidentified |       |       |       |       |       | 0.479 |       |       |
| Agaricomycetes | Thelephorales  | Thelephoraceae | unidentified       | unidentified |       |       |       |       |       | 0.081 | 0.027 |       |
| Agaricomycetes | Thelephorales  | Thelephoraceae | unidentified       | unidentified |       |       |       |       |       |       | 0.038 |       |
| Agaricomycetes | Thelephorales  | Thelephoraceae | unidentified       | unidentified |       |       |       |       | 0.015 |       |       |       |
| Agaricomycetes | Trechisporales | Hydnodontaceae | <i>Trechispora</i> | unidentified |       | 0.225 |       |       |       |       |       |       |
| Agaricomycetes | Trechisporales | Hydnodontaceae | <i>Trechispora</i> | unidentified | 0.048 |       | 0.048 |       |       |       |       |       |
| Agaricomycetes | Trechisporales | Hydnodontaceae | <i>Trechispora</i> | unidentified |       | 0.037 |       |       |       |       |       |       |
| Agaricomycetes | Trechisporales | Hydnodontaceae | <i>Trechispora</i> | unidentified | 0.01  |       | 0.01  |       |       |       |       |       |
| Agaricomycetes | Trechisporales | Hydnodontaceae | <i>Trechispora</i> | unidentified |       |       |       |       |       | 6.52  |       |       |
| Agaricomycetes | Trechisporales | Hydnodontaceae | <i>Trechispora</i> | unidentified |       |       |       |       |       | 6.46  |       |       |
| Agaricomycetes | Trechisporales | unidentified   | unidentified       | unidentified |       | 0.045 |       |       |       |       |       |       |
| Agaricomycetes | Trechisporales | unidentified   | unidentified       | unidentified |       |       |       | 0.04  |       |       |       |       |
| Agaricomycetes | Trechisporales | unidentified   | unidentified       | unidentified |       |       |       |       |       | 0.04  |       |       |
| Agaricomycetes | unidentified   | unidentified   | unidentified       | unidentified | 0.033 |       | 0.033 |       |       |       |       |       |
| Agaricomycetes | unidentified   | unidentified   | unidentified       | unidentified |       | 0.105 |       |       |       |       |       |       |
| Agaricomycetes | unidentified   | unidentified   | unidentified       | unidentified |       |       |       | 0.079 |       |       |       |       |

|                      |                  |                   |                        |                                   |       |        |       |       |        |       |       |       |
|----------------------|------------------|-------------------|------------------------|-----------------------------------|-------|--------|-------|-------|--------|-------|-------|-------|
| Agaricomycetes       | unidentified     | unidentified      | unidentified           | unidentified                      |       | 0.037  |       |       |        |       |       |       |
| Agaricomycetes       | unidentified     | unidentified      | unidentified           | unidentified                      | 0.01  |        | 0.01  |       |        |       |       |       |
| Agaricomycetes       | unidentified     | unidentified      | unidentified           | unidentified                      |       |        |       | 0.02  |        |       |       |       |
| Agaricomycetes       | unidentified     | unidentified      | unidentified           | unidentified                      |       |        |       |       | 42.991 |       | 0.376 |       |
| Agaricomycetes       | unidentified     | unidentified      | unidentified           | unidentified                      |       |        |       |       | 37.298 |       | 0.129 |       |
| Agaricomycetes       | unidentified     | unidentified      | unidentified           | unidentified                      |       |        |       |       |        |       | 3.889 |       |
| Agaricomycetes       | unidentified     | unidentified      | unidentified           | unidentified                      |       |        |       |       | 0.962  | 0.277 | 0.709 |       |
| Agaricomycetes       | unidentified     | unidentified      | unidentified           | unidentified                      |       |        |       |       | 0.993  |       |       |       |
| Agaricomycetes       | unidentified     | unidentified      | unidentified           | unidentified                      |       |        |       |       |        |       |       | 5.052 |
| Agaricomycetes       | unidentified     | unidentified      | unidentified           | unidentified                      |       |        |       |       |        |       |       | 3.536 |
| Agaricomycetes       | unidentified     | unidentified      | unidentified           | unidentified                      |       |        |       |       | 0.336  |       |       |       |
| Agaricomycetes       | unidentified     | unidentified      | unidentified           | unidentified                      |       |        |       |       |        |       | 0.279 |       |
| Agaricomycetes       | unidentified     | unidentified      | unidentified           | unidentified                      |       |        |       |       |        | 0.209 |       |       |
| Agaricomycetes       | unidentified     | unidentified      | unidentified           | unidentified                      |       |        |       |       |        | 0.189 |       |       |
| Agaricomycetes       | unidentified     | unidentified      | unidentified           | unidentified                      |       |        |       |       |        |       | 0.07  |       |
| Agaricomycetes       | unidentified     | unidentified      | unidentified           | unidentified                      |       |        |       |       |        | 0.054 |       |       |
| Agaricomycetes       | unidentified     | unidentified      | unidentified           | unidentified                      |       |        |       |       | 0.031  |       |       |       |
| Agaricomycetes       | unidentified     | unidentified      | unidentified           | unidentified                      |       |        |       |       | 0.023  |       |       |       |
| Agaricomycetes       | unidentified     | unidentified      | unidentified           | unidentified                      |       |        |       |       |        |       | 0.016 |       |
| Agaricomycetes       | unidentified     | unidentified      | unidentified           | unidentified                      |       |        |       |       |        | 0.013 |       |       |
| Agaricostilbomycetes | Agaricostilbales | Agaricostilbaceae | <i>Sterigmatomyces</i> | <i>Sterigmatomyces halophilus</i> |       |        |       |       |        |       |       | 3.789 |
| Agaricostilbomycetes | Agaricostilbales | Agaricostilbaceae | <i>Sterigmatomyces</i> | <i>Sterigmatomyces halophilus</i> |       |        |       |       |        |       | 0.032 |       |
| Geminibasidiomycetes | Geminibasidiales | Geminibasidiaceae | <i>Geminibasidium</i>  | unidentified                      |       |        |       |       |        |       | 0.07  |       |
| unidentified         | unidentified     | unidentified      | unidentified           | unidentified                      | 1.445 | 32.415 | 1.445 | 2.887 |        |       |       |       |
| unidentified         | unidentified     | unidentified      | unidentified           | unidentified                      | 1.217 | 1.775  | 1.217 | 0.05  |        |       |       |       |
| unidentified         | unidentified     | unidentified      | unidentified           | unidentified                      | 1.369 |        | 1.369 |       |        |       |       |       |

|              |              |              |              |              |       |       |       |       |  |       |        |       |
|--------------|--------------|--------------|--------------|--------------|-------|-------|-------|-------|--|-------|--------|-------|
| unidentified | unidentified | unidentified | unidentified | unidentified | 0.765 | 0.831 | 0.765 |       |  |       |        |       |
| unidentified | unidentified | unidentified | unidentified | unidentified |       | 2.726 |       |       |  |       |        |       |
| unidentified | unidentified | unidentified | unidentified | unidentified |       | 2.674 |       |       |  |       |        |       |
| unidentified | unidentified | unidentified | unidentified | unidentified | 0.29  | 0.202 | 0.29  | 0.595 |  |       |        |       |
| unidentified | unidentified | unidentified | unidentified | unidentified |       | 0.839 |       |       |  |       |        |       |
| unidentified | unidentified | unidentified | unidentified | unidentified | 0.048 | 0.075 | 0.048 | 0.258 |  |       |        |       |
| unidentified | unidentified | unidentified | unidentified | unidentified |       | 0.322 |       |       |  |       |        |       |
| unidentified | unidentified | unidentified | unidentified | unidentified | 0.09  |       | 0.09  |       |  |       |        |       |
| unidentified | unidentified | unidentified | unidentified | unidentified |       |       |       | 0.327 |  |       |        |       |
| unidentified | unidentified | unidentified | unidentified | unidentified |       | 0.022 |       | 0.258 |  |       |        |       |
| unidentified | unidentified | unidentified | unidentified | unidentified |       |       |       | 0.278 |  |       |        |       |
| unidentified | unidentified | unidentified | unidentified | unidentified |       | 0.082 |       |       |  |       |        |       |
| unidentified | unidentified | unidentified | unidentified | unidentified |       | 0.06  |       |       |  |       |        |       |
| unidentified | unidentified | unidentified | unidentified | unidentified | 0.014 |       | 0.014 |       |  |       |        |       |
| unidentified | unidentified | unidentified | unidentified | unidentified | 0.014 |       | 0.014 |       |  |       |        |       |
| unidentified | unidentified | unidentified | unidentified | unidentified | 0.014 |       | 0.014 |       |  |       |        |       |
| unidentified | unidentified | unidentified | unidentified | unidentified |       | 0.022 |       |       |  |       |        |       |
| unidentified | unidentified | unidentified | unidentified | unidentified |       | 0.022 |       |       |  |       |        |       |
| unidentified | unidentified | unidentified | unidentified | unidentified |       | 0.015 |       |       |  |       |        |       |
| unidentified | unidentified | unidentified | unidentified | unidentified |       |       |       | 0.02  |  |       |        |       |
| unidentified | unidentified | unidentified | unidentified | unidentified |       |       |       | 0.02  |  |       |        |       |
| unidentified | unidentified | unidentified | unidentified | unidentified |       |       |       | 0.02  |  |       |        |       |
| unidentified | unidentified | unidentified | unidentified | unidentified |       |       |       |       |  |       | 27.076 |       |
| unidentified | unidentified | unidentified | unidentified | unidentified |       |       |       |       |  |       | 21.861 | 0.278 |
| unidentified | unidentified | unidentified | unidentified | unidentified |       |       |       |       |  | 5.542 |        |       |
| unidentified | unidentified | unidentified | unidentified | unidentified |       |       |       |       |  | 3.429 |        |       |
| unidentified | unidentified | unidentified | unidentified | unidentified |       |       |       |       |  |       | 1.375  |       |
| unidentified | unidentified | unidentified | unidentified | unidentified |       |       |       |       |  |       |        | 3.284 |

|                        |                   |                    |                      |                            |  |       |  |  |       |       |       |  |
|------------------------|-------------------|--------------------|----------------------|----------------------------|--|-------|--|--|-------|-------|-------|--|
| unidentified           | unidentified      | unidentified       | unidentified         | unidentified               |  |       |  |  | 0.1   |       | 0.505 |  |
| unidentified           | unidentified      | unidentified       | unidentified         | unidentified               |  |       |  |  | 0.359 |       |       |  |
| unidentified           | unidentified      | unidentified       | unidentified         | unidentified               |  |       |  |  |       | 0.216 |       |  |
| unidentified           | unidentified      | unidentified       | unidentified         | unidentified               |  |       |  |  |       |       | 0.167 |  |
| unidentified           | unidentified      | unidentified       | unidentified         | unidentified               |  |       |  |  |       |       | 0.156 |  |
| unidentified           | unidentified      | unidentified       | unidentified         | unidentified               |  |       |  |  |       |       | 0.14  |  |
| unidentified           | unidentified      | unidentified       | unidentified         | unidentified               |  |       |  |  |       |       | 0.091 |  |
| unidentified           | unidentified      | unidentified       | unidentified         | unidentified               |  |       |  |  |       |       | 0.086 |  |
| unidentified           | unidentified      | unidentified       | unidentified         | unidentified               |  |       |  |  |       |       | 0.059 |  |
| unidentified           | unidentified      | unidentified       | unidentified         | unidentified               |  |       |  |  |       | 0.061 |       |  |
| unidentified           | unidentified      | unidentified       | unidentified         | unidentified               |  |       |  |  |       |       | 0.048 |  |
| unidentified           | unidentified      | unidentified       | unidentified         | unidentified               |  |       |  |  |       | 0.047 |       |  |
| unidentified           | unidentified      | unidentified       | unidentified         | unidentified               |  |       |  |  |       |       | 0.032 |  |
| unidentified           | unidentified      | unidentified       | unidentified         | unidentified               |  |       |  |  |       | 0.034 |       |  |
| unidentified           | unidentified      | unidentified       | unidentified         | unidentified               |  |       |  |  |       |       | 0.027 |  |
| unidentified           | unidentified      | unidentified       | unidentified         | unidentified               |  |       |  |  | 0.015 |       |       |  |
| unidentified           | unidentified      | unidentified       | unidentified         | unidentified               |  |       |  |  | 0.015 |       |       |  |
| unidentified           | unidentified      | unidentified       | unidentified         | unidentified               |  |       |  |  |       | 0.027 |       |  |
| unidentified           | unidentified      | unidentified       | unidentified         | unidentified               |  |       |  |  |       | 0.027 |       |  |
| unidentified           | unidentified      | unidentified       | unidentified         | unidentified               |  |       |  |  |       | 0.02  |       |  |
| unidentified           | unidentified      | unidentified       | unidentified         | unidentified               |  |       |  |  | 0.012 |       |       |  |
| unidentified           | unidentified      | unidentified       | unidentified         | unidentified               |  |       |  |  | 0.008 |       |       |  |
| <b>Chytridiomycota</b> |                   |                    |                      |                            |  |       |  |  |       |       |       |  |
| Rhizophlyctidomycetes  | Rhizophlyctidales | Rhizophlyctidaceae | <i>Rhizophlyctis</i> | <i>Rhizophlyctis rosea</i> |  |       |  |  |       |       | 0.032 |  |
| Rhizophlyctidomycetes  | Rhizophlyctidales | Rhizophlyctidaceae | <i>Rhizophlyctis</i> | unidentified               |  | 0.015 |  |  |       |       |       |  |
| Rhizophlyctidomycetes  | Rhizophlyctidales | Rhizophlyctidaceae | <i>Rhizophlyctis</i> | unidentified               |  |       |  |  |       |       | 0.081 |  |

|                          |                |                 |                    |                                |        |       |        |       |       |       |       |  |
|--------------------------|----------------|-----------------|--------------------|--------------------------------|--------|-------|--------|-------|-------|-------|-------|--|
| unidentified             | unidentified   | unidentified    | unidentified       | unidentified                   |        |       |        |       |       |       | 0.032 |  |
| unidentified             | unidentified   | unidentified    | unidentified       | unidentified                   |        |       |        |       |       | 0.013 |       |  |
| <b>Mortierellomycota</b> |                |                 |                    |                                |        |       |        |       |       |       |       |  |
| Mortierellomycetes       | Mortierellales | Mortierellaceae | <i>Mortierella</i> | <i>Mortierella capitata</i>    |        |       |        |       |       | 0.054 | 0.145 |  |
| Mortierellomycetes       | Mortierellales | Mortierellaceae | <i>Mortierella</i> | <i>Mortierella selenospora</i> |        |       |        |       | 0.035 |       |       |  |
| Mortierellomycetes       | Mortierellales | unidentified    | unidentified       | unidentified                   | 0.314  |       | 0.314  |       |       |       |       |  |
| Mortierellomycetes       | Mortierellales | unidentified    | unidentified       | unidentified                   |        |       |        |       |       |       | 0.059 |  |
| Mortierellomycetes       | Mortierellales | unidentified    | unidentified       | unidentified                   |        |       |        |       |       | 0.04  |       |  |
| <b>unidentified</b>      |                |                 |                    |                                |        |       |        |       |       |       |       |  |
| unidentified             | unidentified   | unidentified    | unidentified       | unidentified                   | 52.063 | 2.135 | 52.063 | 0.109 |       |       |       |  |
| unidentified             | unidentified   | unidentified    | unidentified       | unidentified                   |        |       |        | 3.126 |       |       |       |  |
| unidentified             | unidentified   | unidentified    | unidentified       | unidentified                   | 0.038  |       | 0.038  |       |       |       |       |  |
| unidentified             | unidentified   | unidentified    | unidentified       | unidentified                   | 0.038  |       | 0.038  |       |       |       |       |  |
| unidentified             | unidentified   | unidentified    | unidentified       | unidentified                   |        |       |        | 0.159 |       |       |       |  |
| unidentified             | unidentified   | unidentified    | unidentified       | unidentified                   |        |       |        | 0.159 |       |       |       |  |
| unidentified             | unidentified   | unidentified    | unidentified       | unidentified                   |        |       |        |       | 0.062 |       |       |  |
| unidentified             | unidentified   | unidentified    | unidentified       | unidentified                   |        |       |        |       |       |       | 0.086 |  |
| unidentified             | unidentified   | unidentified    | unidentified       | unidentified                   |        |       |        |       |       |       | 0.086 |  |
| unidentified             | unidentified   | unidentified    | unidentified       | unidentified                   | 0.024  |       | 0.024  | 0.05  |       |       |       |  |
| unidentified             | unidentified   | unidentified    | unidentified       | unidentified                   |        |       |        |       | 0.058 |       |       |  |
| unidentified             | unidentified   | unidentified    | unidentified       | unidentified                   |        |       |        |       |       | 0.101 |       |  |
| unidentified             | unidentified   | unidentified    | unidentified       | unidentified                   |        |       |        | 2.987 |       |       |       |  |
| unidentified             | unidentified   | unidentified    | unidentified       | unidentified                   |        |       |        |       |       |       | 0.081 |  |
| unidentified             | unidentified   | unidentified    | unidentified       | unidentified                   |        |       |        |       |       |       | 0.081 |  |
| unidentified             | unidentified   | unidentified    | unidentified       | unidentified                   | 0.033  |       | 0.033  |       |       |       |       |  |

[illegible]

[illegible]

[illegible]

[illegible]

[illegible]

[illegible]

|              |              |              |              |              |       |       |       |       |       |       |      |       |
|--------------|--------------|--------------|--------------|--------------|-------|-------|-------|-------|-------|-------|------|-------|
| unidentified | unidentified | unidentified | unidentified | unidentified | 0.228 |       | 0.228 | 0.079 |       |       |      |       |
| unidentified | unidentified | unidentified | unidentified | unidentified |       |       |       |       |       | 0.648 |      |       |
| unidentified | unidentified | unidentified | unidentified | unidentified | 0.223 |       | 0.223 |       |       |       |      |       |
| unidentified | unidentified | unidentified | unidentified | unidentified |       |       |       | 0.873 |       |       |      |       |
| unidentified | unidentified | unidentified | unidentified | unidentified | 0.176 |       | 0.176 | 0.089 |       |       |      |       |
| unidentified | unidentified | unidentified | unidentified | unidentified |       | 0.614 |       |       |       |       |      |       |
| unidentified | unidentified | unidentified | unidentified | unidentified |       |       |       |       |       | 0.533 |      |       |
| unidentified | unidentified | unidentified | unidentified | unidentified |       |       |       |       | 0.089 | 0.337 |      |       |
| unidentified | unidentified | unidentified | unidentified | unidentified |       |       |       |       |       | 0.391 |      |       |
| unidentified | unidentified | unidentified | unidentified | unidentified |       |       |       |       |       | 0.385 |      |       |
| unidentified | unidentified | unidentified | unidentified | unidentified |       | 6.875 |       |       |       |       |      |       |
| unidentified | unidentified | unidentified | unidentified | unidentified |       |       |       | 0.546 |       |       |      |       |
| unidentified | unidentified | unidentified | unidentified | unidentified |       |       |       |       |       | 0.371 |      |       |
| unidentified | unidentified | unidentified | unidentified | unidentified |       |       |       |       |       |       | 0.29 |       |
| unidentified | unidentified | unidentified | unidentified | unidentified |       |       |       |       |       | 0.344 |      |       |
| unidentified | unidentified | unidentified | unidentified | unidentified | 0.119 |       | 0.119 |       |       |       |      |       |
| unidentified | unidentified | unidentified | unidentified | unidentified |       |       |       |       |       | 0.324 |      |       |
| unidentified | unidentified | unidentified | unidentified | unidentified | 0.086 | 0.075 | 0.086 |       |       |       |      |       |
| unidentified | unidentified | unidentified | unidentified | unidentified |       |       |       |       | 0.178 |       |      |       |
| unidentified | unidentified | unidentified | unidentified | unidentified |       |       |       |       |       | 0.304 |      |       |
| unidentified | unidentified | unidentified | unidentified | unidentified |       | 0.045 |       | 0.377 |       |       |      |       |
| unidentified | unidentified | unidentified | unidentified | unidentified | 1.878 | 0.232 | 1.878 | 0.873 |       |       |      |       |
| unidentified | unidentified | unidentified | unidentified | unidentified |       |       |       |       |       | 0.297 |      |       |
| unidentified | unidentified | unidentified | unidentified | unidentified |       |       |       | 0.427 |       |       |      |       |
| unidentified | unidentified | unidentified | unidentified | unidentified |       |       |       |       |       |       |      | 1.086 |
| unidentified | unidentified | unidentified | unidentified | unidentified |       |       |       | 0.417 |       |       |      |       |
| unidentified | unidentified | unidentified | unidentified | unidentified |       | 0.307 |       |       |       |       |      |       |
| unidentified | unidentified | unidentified | unidentified | unidentified |       | 0.3   |       |       |       |       |      |       |

|              |              |              |              |              |       |       |       |       |       |       |  |       |
|--------------|--------------|--------------|--------------|--------------|-------|-------|-------|-------|-------|-------|--|-------|
| unidentified | unidentified | unidentified | unidentified | unidentified |       |       |       |       | 0.155 |       |  |       |
| unidentified | unidentified | unidentified | unidentified | unidentified | 0.076 |       | 0.076 | 0.069 |       |       |  |       |
| unidentified | unidentified | unidentified | unidentified | unidentified | 0.09  |       | 0.09  |       |       |       |  |       |
| unidentified | unidentified | unidentified | unidentified | unidentified | 0.067 | 0.067 | 0.067 |       |       |       |  |       |
| unidentified | unidentified | unidentified | unidentified | unidentified | 1.05  |       | 1.05  |       |       |       |  |       |
| unidentified | unidentified | unidentified | unidentified | unidentified | 0.052 |       | 0.052 | 0.149 |       |       |  |       |
| unidentified | unidentified | unidentified | unidentified | unidentified |       |       |       |       | 0.089 | 0.094 |  |       |
| unidentified | unidentified | unidentified | unidentified | unidentified |       | 0.195 |       |       |       | 0.061 |  |       |
| unidentified | unidentified | unidentified | unidentified | unidentified |       |       |       |       |       |       |  | 0.884 |
| unidentified | unidentified | unidentified | unidentified | unidentified | 0.076 | 0.015 | 0.076 |       |       |       |  |       |
| unidentified | unidentified | unidentified | unidentified | unidentified |       |       |       |       | 0.128 |       |  |       |
| unidentified | unidentified | unidentified | unidentified | unidentified |       |       |       |       |       | 0.209 |  |       |
| unidentified | unidentified | unidentified | unidentified | unidentified |       |       |       |       |       | 0.202 |  |       |
| unidentified | unidentified | unidentified | unidentified | unidentified | 0.067 |       | 0.067 |       |       |       |  |       |
| unidentified | unidentified | unidentified | unidentified | unidentified |       | 0.112 |       | 0.089 | 0.015 |       |  |       |
| unidentified | unidentified | unidentified | unidentified | unidentified |       | 2.786 |       |       |       |       |  |       |
| unidentified | unidentified | unidentified | unidentified | unidentified | 0.062 |       | 0.062 |       |       |       |  |       |
| unidentified | unidentified | unidentified | unidentified | unidentified |       |       |       | 0.258 |       |       |  |       |
| unidentified | unidentified | unidentified | unidentified | unidentified |       |       |       |       | 0.1   |       |  |       |
| unidentified | unidentified | unidentified | unidentified | unidentified |       |       |       | 0.248 |       |       |  |       |
| unidentified | unidentified | unidentified | unidentified | unidentified | 0.057 |       | 0.057 |       |       |       |  |       |
| unidentified | unidentified | unidentified | unidentified | unidentified |       |       |       |       | 0.093 |       |  |       |
| unidentified | unidentified | unidentified | unidentified | unidentified |       |       |       | 0.228 |       |       |  |       |
| unidentified | unidentified | unidentified | unidentified | unidentified |       |       |       |       |       | 0.155 |  |       |
| unidentified | unidentified | unidentified | unidentified | unidentified |       |       |       | 0.218 |       |       |  |       |
| unidentified | unidentified | unidentified | unidentified | unidentified |       |       |       | 0.218 |       |       |  |       |
| unidentified | unidentified | unidentified | unidentified | unidentified | 0.247 | 1.693 | 0.247 |       |       |       |  |       |
| unidentified | unidentified | unidentified | unidentified | unidentified |       |       |       |       | 0.085 |       |  |       |

|              |              |              |              |              |       |       |       |       |       |       |       |       |
|--------------|--------------|--------------|--------------|--------------|-------|-------|-------|-------|-------|-------|-------|-------|
| unidentified | unidentified | unidentified | unidentified | unidentified |       |       |       |       |       |       | 0.118 |       |
| unidentified | unidentified | unidentified | unidentified | unidentified |       |       |       |       |       |       | 0.118 |       |
| unidentified | unidentified | unidentified | unidentified | unidentified |       |       |       |       |       |       | 0.118 |       |
| unidentified | unidentified | unidentified | unidentified | unidentified |       | 0.157 |       |       |       |       |       |       |
| unidentified | unidentified | unidentified | unidentified | unidentified |       |       |       | 0.208 |       |       |       |       |
| unidentified | unidentified | unidentified | unidentified | unidentified |       |       |       | 0.198 |       |       |       |       |
| unidentified | unidentified | unidentified | unidentified | unidentified |       |       |       |       | 0.077 |       |       |       |
| unidentified | unidentified | unidentified | unidentified | unidentified |       |       |       |       |       |       | 0.107 |       |
| unidentified | unidentified | unidentified | unidentified | unidentified |       |       |       |       |       |       | 0.107 |       |
| unidentified | unidentified | unidentified | unidentified | unidentified |       | 2.464 |       |       |       |       |       |       |
| unidentified | unidentified | unidentified | unidentified | unidentified |       |       |       |       |       | 0.128 |       |       |
| unidentified | unidentified | unidentified | unidentified | unidentified |       |       |       | 0.179 |       |       |       |       |
| unidentified | unidentified | unidentified | unidentified | unidentified |       |       |       |       |       | 0.121 |       |       |
| unidentified | unidentified | unidentified | unidentified | unidentified |       |       |       |       |       |       | 0.097 |       |
| unidentified | unidentified | unidentified | unidentified | unidentified |       |       |       | 0.169 |       |       |       |       |
| unidentified | unidentified | unidentified | unidentified | unidentified |       |       |       |       |       | 0.115 |       |       |
| unidentified | unidentified | unidentified | unidentified | unidentified |       |       |       |       |       |       | 0.091 |       |
| unidentified | unidentified | unidentified | unidentified | unidentified |       |       |       |       |       |       |       | 0.429 |
| unidentified | unidentified | unidentified | unidentified | unidentified | 0.038 |       | 0.038 |       |       |       |       |       |
| unidentified | unidentified | unidentified | unidentified | unidentified | 0.038 |       | 0.038 |       |       |       |       |       |
