# Supplementary material for: Hidden Tenants: Microbiota of the Rhizosphere and Phyllosphere of Cordia dodecandra Trees in Mayan Forests and Homegardens
Source: MDPI journal article supplement (doi:10.3390/plants11223098), 2022-11-15
Supplement: s1 [file s1]

# Hidden Tenants: Microbiota of the Rhizosphere and Phyllosphere of *Cordia dodecandra* Trees in Mayan Forests and Homegardens

Carla G. May-Mutul, Miguel A. López-Garrido, Aileen O'Connor-Sánchez, Yuri J. Peña-Ramírez, Natalia Y. Labrín-Sotomayor, Héctor Estrada-Medina and Miriam M. Ferrer

## Supplementary material File S1. Pipelines for the bioinformatic analyses in Qiime2 2022.2 of Bacteria (16S) and Fungi (ITS)

```
#### PIPELINE FOR BACTERIA METAGENOMIC ANALYSES 16S
#### Qiime2 activation
conda activate qiime2-2022.2
#### Fastqc análisis
fastqc /*.fastq .
#### Multifastqc análisis
multifastqc .
#### Cut adapters using cut_adapt_loop_bash
bash cut_adapt_loop.bash.sh
READS=../raw_sequences
CUT_READS=../cutreads
SAMPLE_NAMES=../samples.txt
CUT_READ1_suf="_1_cut.fastq.gz"
CUT_READ2_suf="_2_cut.fastq.gz"
IN_READ1_suf="_R1.fastq"
IN_READ2_suf="_R2.fastq"
ls $READS
while read line
do
    sample=$line
    cutadapt --quality-cutoff 20,15 --cores 11 \
    -u 9 \
    -U 9 \
    --adapter TTAAGTTCCTCTAAATGACCAAG -A
GCATCGATGAAGAACGCAGC\
    --front CTTGGTCATTAGAGGAAGTAA -G
GCTGCGTTCTTCATCGATGC\
    -o $CUT_READS/$sample$CUT_READ1_suf \
    -p $CUT_READS/$sample$CUT_READ2_suf \
    $READS/$sample$IN_READ1_suf $READS/$sample$IN_READ2_suf >
$CUT_READS/$sample"_report.txt"
done < $SAMPLE_NAMES
#### Import archive in Fastq format
qiime tools import \
```

```

--type SampleData[PairedEndSequencesWithQuality] \
--input-format PairedEndFastqManifestPhred33\
--input-path /*.txt \
--output-path sequences.qza
#### Demuxing
qiime demux summarize \
  --i-data sequences.qza \
  --o-visualization /*.qzv
#### Quality control of sequences (denoising) in DADA2
qiime dada2 denoise-paired \
  --i-demultiplexed-seqs trimmed.qza \
  --p-trim-left-f 13 \
  --p-trim-left-r 13 \
  --p-trunc-len-f 220 \
  --p-trunc-len-r 200 \
  --output-dir /
#### Create feature tables
qiime feature-table summarize \
  --i-table dada2out/table.qza \
  --o-visualization /*.qzv
qiime metadata tabulate \
  --m-input-file dada2out/denoising_stats.qza \
  --o-visualization /*.qzv
qiime feature-table tabulate-seqs \
  --i-data dada2out/representative_sequences.qza \
  --o-visualization /*.qzv
#### Taxonomy classification
# Run a classifier pre-trained
qiime tools import \
  --type 'FeatureData[Sequence]' \
  --input-path /*.fasta \
  --output-path /*.qza
qiime tools import \
  --type 'FeatureData[Taxonomy]' \
  --input-format HeaderlessTSVTaxonomyFormat \
  --input-path /*.txt \
  --output-path /*.qza
qiime feature-classifier extract-reads \
  --i-sequences *.qza \
  --p-f-primer AGAGTTTGATCCTGGCTCAG \
  --p-r-primer GCTGCCTCCGCTAGGAGT \
  --p-trunc-len 120 \
  --p-min-length 100 \
  --p-max-length 400 \
  --o-reads . ref-seqs.qza\-classifier.qza
qiime feature-classifier fit-classifier-naive-bayes \
  --i-reference-reads ref-seqs.qza \

```

```

--i-reference-taxonomy ref-taxonomy.qza \
--o-classifier classifier.qza
#### Taxonomy assignament
qiime feature-classifier classify-sklearn \
  --i-classifier ../*.qza \
  --i-reads ../*.qza \
  --o-classification *.qza
qiime metadata tabulate \
  --m-input-file ../*.qza \
  --o-visualization ../*.qzv
qiime taxa collapse \
  --i-table ../*.qza \
  --i-taxonomy ../*.qza \
  --p-level 1-7 \
  --o-collapsed-table ../*.qza
##Filter host plant's genomes (chloroplast and mitochondria)
qiime taxa filter-table \
  --i-table pe-table.qza \
  --i-taxonomy pe-taxonomy.qza \
  --p-include p__ \
  --p-exclude mitochondria,Mitochondria,Chloroplast,chloroplast \
  --o-filtered-table ../*.qza
qiime metadata tabulate \
  --m-input-file ../*.qza \
  --o-visualization ../*.qzv
#### Taxonomy bar chart
qiime taxa barplot \
  --i-table table.qza \
  --i-taxonomy taxonomy.qza \
  --m-metadata-file sample-metadata.tsv \
  --o-visualization ../*.qzv
####PIPELINE FOR FUNGI METAGENOMIC ANALYSES ITS
#### Qiime2 Activation
conda activate qiime2-2022.2
#### Installing bioconda ITSxpress
conda install -c bioconda itsxpress
pip install q2-itsxpress
#### fastqc análisis
fastqc ../*.fastq
#### multiqc análisis
multiqc .
#### Cut adapters using cut_adapt_loop_bash
bash cutadapt_loopITS.bash
READS=../raw_sequences
CUT_READS=../cutreads
SAMPLE_NAMES=../samples.txt
CUT_READ1_suf="_1_cut.fastq.gz"

```

```

CUT_READ2_suf="_2_cut.fastq.gz"
IN_READ1_suf="_R1.fastq"
IN_READ2_suf="_R2.fastq"
ls $READS
while read line
do
    sample=$line
    cutadapt --quality-cutoff 20,15 --cores 11 \
    -u 9 \
    -U 9 \
    --adaptor GCATCGATGAAGAACGCAGC -A
TTACTTCCTCTAAATGACCAAG \
    --front CTTGGTCATTTAGAGGAAGTAA -G
GCTGCGTTCTTCATCGATGC \
    -o $CUT_READS/$sample$CUT_READ1_suf \
    -p $CUT_READS/$sample$CUT_READ2_suf \
    $READS/$sample$IN_READ1_suf $READS/$sample$IN_READ2_suf >
$CUT_READS/$sample"_report.txt"
done < $SAMPLE_NAMES
#### Import archive in Fastq format and visualization
qiime tools import \
    --type SampleData[PairedEndSequencesWithQuality] \
    --input-format PairedEndFastqManifestPhred33 \
    --input-path manifest.txt \
    --output-path sequences.qza
qiime demux summarize \
    --i-data sequences.qza \
    --o-visualization sequences.qzv
#### Run itsxpress, specifying the sequenced region
qiime itsxpress trim-pair-output-unmerged \
    --i-per-sample-sequences sequences.qza \
    --p-region ITS1-2 \
    --p-taxa ALL \
    --p-threads 6 \
    --verbose \
    --o-trimmed trimmed.qza
#### Quality control of sequences(denoise)in DADA2
qiime dada2 denoise-paired \
    --i-demultiplexed-seqs trimmed.qza \
    --p-trim-left-f 13 \
    --p-trim-left-r 13 \
    --p-trunc-len-f 240 \
    --p-trunc-len-r 200 \
    --output-dir dada2out
#### Sequences table visualization
qiime feature-table summarize \
    --i-table dada2out/table.qza \

```

```

--o-visualization dada2_tableviz.qzv
#### Create feature table
qiime metadata tabulate \
  --m-input-file dada2out/denoising_stats.qza \
  --o-visualization dada2_stats.qzv
#### Ver las secuencias representativas
qiime feature-table tabulate-seqs \
  --i-data dada2out/representative_sequences.qza \
  --o-visualization dada2_rep-seqs.qzv
#### Taxonomy classification
#### Unzip and import the database with the script ITS_processing_full_dataset.bash
#### Download and decompress the database for taxonomy analysis in the database
directory
#### 8.0 2018-11-18 All eukaryotes 9 409 (RefS) 54 013 (RepS)
#### Current https://doi.org/10.15156/BIO/786335
6DA3F3DDFBACB7D3031FE12EF14C4F5464235C73230C217D14E8C0EAB1042E86.z
ip
#### Import in qiime2
qiime tools import \
  --type 'FeatureData[Sequence]' \
  --input-path ../sh_refs_qiime_ver8_dynamic_all_02.02.2019.fasta \
  --output-path unite.qza
#### Taxonomy Import (UNITE)
qiime tools import \
  --type 'FeatureData[Taxonomy]' \
  --input-format HeaderlessTSVTaxonomyFormat \
  --input-path ../sh_taxonomy_qiime_ver8_dynamic_all_02.02.2019.txt \
  --output-path unite-taxonomy.qza
#### Training classifier as: classifier.qza
qiime feature-classifier fit-classifier-naive-bayes \
  --i-reference-reads unite.qza \
  --i-reference-taxonomy unite-taxonomy.qza \
  --o-classifier classifier.qza
#### Taxonomy assignment
qiime feature-classifier classify-sklearn \
  --i-classifier ../qiime2-ITSxpress-full-dataset/classifier.qza \
  --i-reads dada2out/representative_sequences.qza \
  --o-classification taxonomy.qza
#### metadata tabulate and results visualization
qiime metadata tabulate \
  --m-input-file taxonomy.qza \
  --o-visualization taxonomy.qzv
#### Create metadata file
ITS_metadata.txt
#### Taxonomy bar chart (taxa bar-plot)
qiime taxa barplot \
  --i-table dada2out/table.qza \

```

```
--i-taxonomy taxonomy.qza \  
--m-metadata-file sample_metadata.txt \  
--o-visualization taxa-bar-plots.qzv
```
