# Supplementary material for: Hidden Tenants: Microbiota of the Rhizosphere and Phyllosphere of Cordia dodecandra Trees in Mayan Forests and Homegardens
Source: MDPI journal article supplement (doi:10.3390/plants11223098), 2022-11-15
Supplement: s1 [file s1]

# Hidden Tenants: Microbiota of the Rhizosphere and Phyllosphere of *Cordia dodecandra* Trees in Mayan Forests and Homegardens

Carla G. May-Mutul, Miguel A. López-Garrido, Aileen O'Connor-Sánchez, Yuri J. Peña-Ramírez, Natalia Y. Labrín-Sotomayor, Héctor Estrada-Medina and Miriam M. Ferrer

**Supplementary material Table S1.** Taxonomic classification assigned to 618 bacteria OTUs from phyllosphere (phy) and rhizosphere (rhi) *Cordia dodecandra* microbiota in Yucatán's forest (for) and homegarden (hom) populations of the Northeast (NE) and Southwest (SW) region. The last 8 columns present the percent (relative frequency) per sample coded by region, population, and compartment.

| Class           | Order            | Family                            | Genus                        | Species                                | SW<br>hom<br>phy | NE<br>hom<br>phy | SW<br>for<br>phy | NE<br>for<br>phy | SW<br>hom<br>rhi | NE<br>hom<br>rhi | SW<br>for<br>rhi | NE<br>for<br>rhi |
|-----------------|------------------|-----------------------------------|------------------------------|----------------------------------------|------------------|------------------|------------------|------------------|------------------|------------------|------------------|------------------|
| Acidobacteriota |                  |                                   |                              |                                        |                  |                  |                  |                  |                  |                  |                  |                  |
| Acidobacteriae  | Acidobacteriae   | Acidobacteriae                    | <i>Paludibaculum</i>         | metagenome                             |                  |                  |                  |                  |                  |                  |                  | 0.031            |
| Acidobacteriae  | Acidobacteriales | Acidobacteriaceae<br>(Subgroup_1) | <i>Edaphobacter</i>          | unidentified                           |                  |                  |                  |                  | 0.035            |                  |                  |                  |
| Acidobacteriae  | Acidobacteriales | Koribacteraceae                   | <i>Candidatus_Koribacter</i> | unidentified                           |                  |                  |                  |                  |                  |                  |                  | 0.157            |
| Acidobacteriae  | Acidobacteriales | uncultured                        | uncultured                   | unidentified                           |                  |                  |                  |                  | 0.165            |                  |                  |                  |
| Acidobacteriae  | Bryobacterales   | Bryobacteraceae                   | <i>Bryobacter</i>            | uncultured<br><i>Acidobacteriaceae</i> |                  |                  |                  |                  | 0.045            |                  |                  |                  |
| Acidobacteriae  | Bryobacterales   | Bryobacteraceae                   | <i>Bryobacter</i>            | unidentified                           |                  |                  |                  |                  | 0.229            | 0.148            | 0.276            | 0.159            |
| Acidobacteriae  | PAUC26f          | PAUC26f                           | PAUC26f                      | uncultured_ <i>Solibacteraceae</i>     |                  |                  |                  |                  |                  |                  | 0.023            |                  |
| Acidobacteriae  | Solibacterales   | Solibacteraceae                   | <i>Candidatus_Solibacter</i> | uncultured_ <i>Acidobacteriales</i>    |                  |                  |                  |                  |                  |                  | 0.032            |                  |
| Acidobacteriae  | Solibacterales   | Solibacteraceae                   | <i>Candidatus_Solibacter</i> | unidentified                           |                  |                  |                  |                  |                  |                  |                  | 0.128            |
| Acidobacteriae  | Subgroup_2       | Subgroup_2                        | Subgroup_2                   | unidentified                           |                  |                  |                  |                  | 0.045            |                  |                  |                  |
| Acidobacteriae  | unidentified     | unidentified                      | unidentified                 | unidentified                           |                  |                  |                  |                  | 0.055            |                  | 0.051            |                  |



|                     |                       |                        |              |                                |  |  |  |  |       |       |       |       |
|---------------------|-----------------------|------------------------|--------------|--------------------------------|--|--|--|--|-------|-------|-------|-------|
| Subgroup_18         | Subgroup_18           | Subgroup_18            | Subgroup_18  | uncultured_bacterium           |  |  |  |  | 0.115 |       | 0.336 | 0.66  |
| Subgroup_22         | Subgroup_22           | Subgroup_22            | Subgroup_22  | uncultured_proteobacterium     |  |  |  |  |       |       |       | 0.042 |
| Subgroup_22         | Subgroup_22           | Subgroup_22            | Subgroup_22  | unidentified                   |  |  |  |  |       |       | 0.074 | 0.064 |
| Subgroup_25         | Subgroup_25           | Subgroup_25            | Subgroup_25  | uncultured_bacterium           |  |  |  |  | 0.035 |       | 0.041 | 0.384 |
| Subgroup_25         | Subgroup_25           | Subgroup_25            | Subgroup_25  | uncultured_soil                |  |  |  |  | 0.105 |       | 0.065 | 2.622 |
| Subgroup_25         | Subgroup_25           | Subgroup_25            | Subgroup_25  | unidentified                   |  |  |  |  |       |       |       | 0.097 |
| Subgroup_5          | Subgroup_5            | Subgroup_5             | Subgroup_5   | uncultured_Acidobacteria       |  |  |  |  |       |       | 0.083 |       |
| Subgroup_5          | Subgroup_5            | Subgroup_5             | Subgroup_5   | uncultured_bacterium           |  |  |  |  | 0.229 | 0.148 | 0.765 | 0.057 |
| Subgroup_5          | Subgroup_5            | Subgroup_5             | Subgroup_5   | unidentified                   |  |  |  |  |       |       | 0.088 |       |
| Thermoanaerobaculia | Thermoanaerobaculales | Thermoanaerobaculaceae | Subgroup_10  | Acidobacteria_bacterium        |  |  |  |  | 0.115 |       |       |       |
| Thermoanaerobaculia | Thermoanaerobaculales | Thermoanaerobaculaceae | Subgroup_10  | uncultured_Alphaproteobacteria |  |  |  |  | 0.15  |       |       |       |
| Thermoanaerobaculia | Thermoanaerobaculales | Thermoanaerobaculaceae | Subgroup_10  | uncultured_Bacteroidetes       |  |  |  |  |       |       |       | 0.035 |
| Thermoanaerobaculia | Thermoanaerobaculales | Thermoanaerobaculaceae | Subgroup_10  | uncultured_Holophaga           |  |  |  |  |       |       |       | 0.075 |
| Thermoanaerobaculia | Thermoanaerobaculales | Thermoanaerobaculaceae | Subgroup_10  | unidentified                   |  |  |  |  |       |       | 0.083 | 0.34  |
| unidentified        | unidentified          | unidentified           | unidentified | unidentified                   |  |  |  |  |       |       |       | 1.772 |
| Vicinamibacteria    | Subgroup_17           | Subgroup_17            | Subgroup_17  | uncultured_bacterium           |  |  |  |  |       |       |       | 0.06  |
| Vicinamibacteria    | Subgroup_17           | Subgroup_17            | Subgroup_17  | unidentified                   |  |  |  |  |       |       | 0.166 | 0.287 |
| Vicinamibacteria    | Vicinamibacteriales   | uncultured             | uncultured   | uncultured_Acidobacteriales    |  |  |  |  |       |       |       | 0.7   |
| Vicinamibacteria    | Vicinamibacteriales   | uncultured             | uncultured   | unidentified                   |  |  |  |  | 0.254 |       | 0.926 | 3.416 |
| Vicinamibacteria    | Vicinamibacteriales   | unidentified           | unidentified | unidentified                   |  |  |  |  | 0.668 |       | 1.078 | 3.467 |



|                |                   |                     |                            |                                           |       |       |       |  |       |       |       |       |
|----------------|-------------------|---------------------|----------------------------|-------------------------------------------|-------|-------|-------|--|-------|-------|-------|-------|
| Acidimicrobiia | Microtrichales    | Microtrichaceae     | uncultured                 | uncultured_ <i>Actinomycetales</i>        |       |       |       |  |       |       |       | 0.046 |
| Acidimicrobiia | Microtrichales    | uncultured          | uncultured                 | uncultured_ <i>Acidimicrobiia</i>         |       |       |       |  |       |       |       | 0.068 |
| Acidimicrobiia | Microtrichales    | uncultured          | uncultured                 | uncultured_bacterium                      |       |       |       |  | 0.518 | 0.698 | 0.327 | 0.382 |
| Acidimicrobiia | Microtrichales    | uncultured          | uncultured                 | unidentified                              |       |       |       |  |       |       | 1.313 | 0.216 |
| Acidimicrobiia | Microtrichales    | unidentified        | unidentified               | unidentified                              |       |       |       |  |       |       |       | 0.071 |
| Acidimicrobiia | uncultured        | uncultured          | uncultured                 | unidentified                              |       |       |       |  |       |       |       | 0.132 |
| Acidimicrobiia | unidentified      | unidentified        | unidentified               | unidentified                              |       |       |       |  | 0.115 | 0.193 | 0.276 | 0.492 |
| Actinobacteria | 0319-7L14         | 0319-7L14           | 0319-7L14                  | uncultured_actinobacterium                |       |       |       |  |       |       | 0.018 | 0.06  |
| Actinobacteria | 0319-7L14         | 0319-7L14           | 0319-7L14                  | uncultured_bacterium                      |       |       |       |  |       |       |       | 0.022 |
| Actinobacteria | 0319-7L14         | 0319-7L14           | 0319-7L14                  | unidentified                              |       |       |       |  |       |       |       | 0.015 |
| Actinobacteria | Actinomycetales   | Actinomycetaceae    | <i>Actinomyces</i>         | <i>Actinomyces dentalis</i>               |       |       |       |  |       |       |       | 0.031 |
| Actinobacteria | Corynebacteriales | Corynebacteriaceae  | <i>Corynebacterium</i>     | <i>Corynebacterium durum</i>              |       |       |       |  |       |       |       | 0.095 |
| Actinobacteria | Corynebacteriales | Corynebacteriaceae  | <i>Corynebacterium</i>     | <i>Corynebacterium kroppenstedtii</i>     |       |       |       |  |       |       |       | 0.102 |
| Actinobacteria | Corynebacteriales | Corynebacteriaceae  | <i>Corynebacterium</i>     | <i>Corynebacterium tuberculostearicum</i> |       |       |       |  |       |       |       | 0.183 |
| Actinobacteria | Corynebacteriales | Corynebacteriaceae  | <i>Corynebacterium</i>     | unidentified                              |       |       |       |  |       |       |       | 0.095 |
| Actinobacteria | Corynebacteriales | Mycobacteriaceae    | <i>Mycobacterium</i>       | unidentified                              | 1.342 | 1.852 | 0.615 |  | 1.301 | 3.206 | 1.143 | 0.393 |
| Actinobacteria | Corynebacteriales | Nocardiaceae        | <i>Rhodococcus</i>         | unidentified                              |       |       |       |  |       |       | 0.06  |       |
| Actinobacteria | Euzebyales        | Euzebyaceae         | uncultured                 | uncultured_bacterium                      |       |       |       |  |       |       |       | 0.068 |
| Actinobacteria | Frankiales        | Geodermatophilaceae | <i>Blastococcus</i>        | unidentified                              |       |       |       |  |       |       | 0.286 | 0.06  |
| Actinobacteria | Frankiales        | Geodermatophilaceae | <i>Geodermatophilaceae</i> | <i>Blastococcus</i> sp.                   |       |       |       |  | 0.254 |       |       |       |

|                |                |                         |                          |                                              |  |       |       |       |       |       |       |       |
|----------------|----------------|-------------------------|--------------------------|----------------------------------------------|--|-------|-------|-------|-------|-------|-------|-------|
| Actinobacteria | Frankiales     | Geodermatophilac<br>eae | <i>Geodermatophilus</i>  | unidentified                                 |  |       |       |       |       |       |       | 0.079 |
| Actinobacteria | Frankiales     | Geodermatophilac<br>eae | <i>Klenkia</i>           | <i>Klenkia brasiliensis</i>                  |  | 0.182 | 0.36  |       |       |       |       |       |
| Actinobacteria | Frankiales     | Geodermatophilac<br>eae | <i>Klenkia</i>           | unidentified                                 |  | 0.364 |       |       |       |       |       |       |
| Actinobacteria | Frankiales     | Geodermatophilac<br>eae | unidentified             | unidentified                                 |  |       |       |       | 0.279 |       |       |       |
| Actinobacteria | Frankiales     | Sporichthyaceae         | uncultured               | uncultured_bacteriu<br>m                     |  |       |       |       |       |       |       | 0.024 |
| Actinobacteria | Kineosporiales | Kineosporiaceae         | <i>Pseudokineococcus</i> | <i>Ornithinimicrobium</i><br>sp.             |  |       | 0.276 |       |       |       |       |       |
| Actinobacteria | Kineosporiales | Kineosporiaceae         | <i>Pseudokineococcus</i> | <i>Pseudokineococcus</i><br><i>lusitanus</i> |  | 0.281 |       |       |       |       |       |       |
| Actinobacteria | Kineosporiales | Kineosporiaceae         | <i>Quadrisphaera</i>     | <i>Kineosporiaceae</i><br><i>bacterium</i>   |  |       | 0.085 |       |       |       |       |       |
| Actinobacteria | Kineosporiales | Kineosporiaceae         | <i>Quadrisphaera</i>     | <i>Quadrisphaera</i><br><i>granulorum</i>    |  | 0.562 | 0.657 | 0.688 |       |       |       |       |
| Actinobacteria | Kineosporiales | Kineosporiaceae         | <i>Quadrisphaera</i>     | uncultured_ <i>Kineoco</i><br><i>ccus</i>    |  | 0.165 |       |       |       |       |       |       |
| Actinobacteria | Kineosporiales | Kineosporiaceae         | uncultured               | uncultured_bacteriu<br>m                     |  |       |       |       |       |       | 0.065 |       |
| Actinobacteria | Kineosporiales | Kineosporiaceae         | unidentified             | unidentified                                 |  |       |       |       |       |       |       | 0.088 |
| Actinobacteria | Micrococcales  | Brevibacteriaceae       | <i>Brevibacterium</i>    | <i>Brevibacterium</i><br><i>paucivorans</i>  |  |       |       |       |       |       |       | 0.042 |
| Actinobacteria | Micrococcales  | Intrasporangiaceae      | <i>Lapillicoccus</i>     | unidentified                                 |  |       |       |       | 0.06  |       |       |       |
| Actinobacteria | Micrococcales  | Microbacteriaceae       | <i>Agrococcus</i>        | <i>Agrococcus terreus</i>                    |  |       |       |       |       |       | 0.051 |       |
| Actinobacteria | Micrococcales  | Microbacteriaceae       | <i>Agromyces</i>         | unidentified                                 |  |       |       |       |       | 0.134 | 0.203 |       |
| Actinobacteria | Micrococcales  | Microbacteriaceae       | <i>Curtobacterium</i>    | unidentified                                 |  | 0.132 |       |       |       |       |       |       |
| Actinobacteria | Micrococcales  | Microbacteriaceae       | <i>Microbacterium</i>    | unidentified                                 |  | 0.876 |       |       |       |       |       | 0.232 |
| Actinobacteria | Micrococcales  | Micrococcaceae          | <i>Pseudarthrobacter</i> | unidentified                                 |  |       |       |       | 0.209 |       |       |       |
| Actinobacteria | Micrococcales  | Micrococcaceae          | <i>Sinomonas</i>         | uncultured_bacteriu<br>m                     |  |       |       |       |       |       | 0.051 |       |
| Actinobacteria | Micrococcales  | Micrococcaceae          | unidentified             | unidentified                                 |  |       |       |       | 1.226 |       | 0.189 |       |

|                |                     |                      |                          |                                    |  |       |      |       |       |       |       |       |
|----------------|---------------------|----------------------|--------------------------|------------------------------------|--|-------|------|-------|-------|-------|-------|-------|
| Actinobacteria | Micromonosporales   | Micromonosporaceae   | <i>Actinoplanes</i>      | unidentified                       |  | 0.347 |      |       |       |       |       | 0.077 |
| Actinobacteria | Micromonosporales   | Micromonosporaceae   | <i>Catenuloplanes</i>    | unidentified                       |  |       |      |       |       |       |       | 0.068 |
| Actinobacteria | Micromonosporales   | Micromonosporaceae   | <i>Dactylosporangium</i> | unidentified                       |  |       |      |       | 0.145 |       |       |       |
| Actinobacteria | Micromonosporales   | Micromonosporaceae   | <i>Micromonospora</i>    | unidentified                       |  |       |      |       | 0.1   |       |       | 0.102 |
| Actinobacteria | Micromonosporales   | Micromonosporaceae   | <i>Rhizocola</i>         | unidentified                       |  |       |      |       |       |       |       | 0.066 |
| Actinobacteria | Micromonosporales   | Micromonosporaceae   | unidentified             | unidentified                       |  | 0.513 |      |       | 0.553 | 0.49  | 0.604 | 0.572 |
| Actinobacteria | Micromonosporales   | Micromonosporaceae   | <i>Virgisporangium</i>   | unidentified                       |  |       |      |       |       |       |       | 0.214 |
| Actinobacteria | Propionibacteriales | Nocardioidaceae      | <i>Actinopolymorpha</i>  | uncultured_bacterium               |  |       |      |       |       | 0.163 |       |       |
| Actinobacteria | Propionibacteriales | Nocardioidaceae      | <i>Kribbella</i>         | unidentified                       |  |       |      |       | 0.125 | 0.742 | 0.152 | 0.077 |
| Actinobacteria | Propionibacteriales | Nocardioidaceae      | <i>Marmoricola</i>       | unidentified                       |  | 0.099 |      |       |       |       |       | 0.04  |
| Actinobacteria | Propionibacteriales | Nocardioidaceae      | <i>Nocardioides</i>      | <i>Nocardioides kandeliae</i>      |  |       |      |       | 0.11  |       | 0.092 |       |
| Actinobacteria | Propionibacteriales | Nocardioidaceae      | <i>Nocardioides</i>      | <i>Nocardioides marinquinlinus</i> |  | 0.265 |      |       |       |       |       |       |
| Actinobacteria | Propionibacteriales | Nocardioidaceae      | <i>Nocardioides</i>      | unidentified                       |  | 1.918 | 1.06 |       | 0.12  |       | 0.152 | 0.587 |
| Actinobacteria | Propionibacteriales | Nocardioidaceae      | unidentified             | unidentified                       |  |       |      |       |       | 0.327 | 0.442 | 0.031 |
| Actinobacteria | Propionibacteriales | Propionibacteriaceae | <i>Cutibacterium</i>     | unidentified                       |  |       |      |       |       |       |       | 0.911 |
| Actinobacteria | Propionibacteriales | Propionibacteriaceae | <i>Friedmanniella</i>    | unidentified                       |  |       |      | 0.129 |       |       |       |       |
| Actinobacteria | Propionibacteriales | Propionibacteriaceae | <i>Microlunatus</i>      | uncultured_actinobacterium         |  |       |      |       | 1.506 |       | 4.041 | 0.675 |
| Actinobacteria | Propionibacteriales | Propionibacteriaceae | <i>Microlunatus</i>      | unidentified                       |  |       |      |       | 1.341 | 0.193 | 1.77  | 0.313 |

|                |                     |                      |                          |                                    |        |       |        |       |       |       |       |       |
|----------------|---------------------|----------------------|--------------------------|------------------------------------|--------|-------|--------|-------|-------|-------|-------|-------|
| Actinobacteria | Pseudonocardiales   | Pseudonocardiales    | <i>Actinomycetospora</i> | uncultured_bacterium               | 6.711  | 3.043 | 4.388  |       |       |       |       |       |
| Actinobacteria | Pseudonocardiales   | Pseudonocardiales    | <i>Actinomycetospora</i> | unidentified                       | 13.231 | 4.829 | 12.317 | 7.134 |       |       |       |       |
| Actinobacteria | Pseudonocardiales   | Pseudonocardiales    | <i>Actinophytocola</i>   | unidentified                       |        |       |        |       |       | 0.371 | 0.175 |       |
| Actinobacteria | Pseudonocardiales   | Pseudonocardiales    | <i>Amycolatopsis</i>     | unidentified                       |        |       |        |       |       |       |       | 0.046 |
| Actinobacteria | Pseudonocardiales   | Pseudonocardiales    | <i>Crossiella</i>        | unidentified                       |        |       |        |       | 0.194 | 0.653 |       | 0.154 |
| Actinobacteria | Pseudonocardiales   | Pseudonocardiales    | <i>Kibdelosporangium</i> | <i>Kibdelosporangium</i> sp.       |        |       |        |       | 0.145 |       |       |       |
| Actinobacteria | Pseudonocardiales   | Pseudonocardiales    | <i>Kibdelosporangium</i> | unidentified                       |        |       |        |       |       |       | 0.194 |       |
| Actinobacteria | Pseudonocardiales   | Pseudonocardiales    | <i>Lechevalieria</i>     | unidentified                       |        |       |        |       |       |       |       | 0.068 |
| Actinobacteria | Pseudonocardiales   | Pseudonocardiales    | <i>Pseudonocardia</i>    | unidentified                       |        | 2.001 | 2.65   | 1.418 | 0.005 |       | 0.544 | 0.166 |
| Actinobacteria | Pseudonocardiales   | Pseudonocardiales    | <i>Saccharopolyspora</i> | <i>Saccharopolyspora cebuensis</i> |        |       |        |       |       |       |       | 0.06  |
| Actinobacteria | Pseudonocardiales   | Pseudonocardiales    | unidentified             | unidentified                       |        |       |        |       | 0.244 |       |       | 0.06  |
| Actinobacteria | Streptomycetales    | Streptomycetaceae    | <i>Streptomyces</i>      | <i>Streptomyces fractus</i>        |        |       |        |       |       | 0.401 |       |       |
| Actinobacteria | Streptomycetales    | Streptomycetaceae    | <i>Streptomyces</i>      | unidentified                       |        |       |        |       | 0.528 | 4.141 | 0.378 | 0.563 |
| Actinobacteria | Streptosporangiales | Streptosporangiaceae | <i>Nonomuraea</i>        | unidentified                       |        |       |        |       | 0.11  |       |       |       |
| Actinobacteria | Streptosporangiales | Streptosporangiaceae | unidentified             | unidentified                       |        |       |        |       |       |       | 0.074 |       |
| Actinobacteria | Streptosporangiales | Thermomonosporaceae  | <i>Actinoallomurus</i>   | unidentified                       |        |       |        |       |       |       |       | 0.024 |
| Actinobacteria | Streptosporangiales | unidentified         | unidentified             | unidentified                       |        |       |        |       |       |       |       | 0.046 |
| Actinobacteria | unidentified        | unidentified         | unidentified             | unidentified                       |        |       |        |       | 0.259 | 0.163 | 1.295 | 0.474 |
| MB-A2-108      | MB-A2-108           | MB-A2-108            | MB-A2-108                | uncultured_bacterium               |        |       |        |       |       | 0.015 | 0.419 | 0.15  |



|                  |                     |                   |                    |                              |  |  |  |  |       |       |       |       |
|------------------|---------------------|-------------------|--------------------|------------------------------|--|--|--|--|-------|-------|-------|-------|
| MB-A2-108        | MB-A2-108           | MB-A2-108         | MB-A2-108          | unidentified                 |  |  |  |  | 0.723 | 0.237 | 1.369 | 0.331 |
| Rubrobacteria    | Rubrobacterales     | Rubrobacteriaceae | <i>Rubrobacter</i> | metagenome                   |  |  |  |  | 0.957 | 0.312 | 2.493 | 0.64  |
| Rubrobacteria    | Rubrobacterales     | Rubrobacteriaceae | <i>Rubrobacter</i> | uncultured_actinobacterium   |  |  |  |  |       |       |       | 0.044 |
| Rubrobacteria    | Rubrobacterales     | Rubrobacteriaceae | <i>Rubrobacter</i> | uncultured_Actinomycetales   |  |  |  |  | 0.917 |       | 0.641 | 0.327 |
| Rubrobacteria    | Rubrobacterales     | Rubrobacteriaceae | <i>Rubrobacter</i> | uncultured_Rubrobacter       |  |  |  |  | 0.289 |       |       |       |
| Rubrobacteria    | Rubrobacterales     | Rubrobacteriaceae | <i>Rubrobacter</i> | unidentified                 |  |  |  |  | 1.391 |       | 1.29  | 0.291 |
| Thermoleophilina | Gaiellales          | Gaiellaceae       | <i>Gaiella</i>     | uncultured_Acidimicrobiia    |  |  |  |  | 0.16  |       | 0.078 | 0.04  |
| Thermoleophilina | Gaiellales          | Gaiellaceae       | <i>Gaiella</i>     | uncultured_bacterium         |  |  |  |  | 0.508 |       | 0.3   | 0.777 |
| Thermoleophilina | Gaiellales          | Gaiellaceae       | <i>Gaiella</i>     | uncultured_organism          |  |  |  |  |       |       | 0.032 | 0.121 |
| Thermoleophilina | Gaiellales          | Gaiellaceae       | <i>Gaiella</i>     | uncultured_Rubrobacteria     |  |  |  |  | 0.209 |       |       | 0.084 |
| Thermoleophilina | Gaiellales          | Gaiellaceae       | <i>Gaiella</i>     | unidentified                 |  |  |  |  |       |       | 0.493 | 1.479 |
| Thermoleophilina | Gaiellales          | uncultured        | uncultured         | uncultured_actinobacterium   |  |  |  |  | 0.08  |       | 0.336 | 1.675 |
| Thermoleophilina | Gaiellales          | uncultured        | uncultured         | uncultured_bacterium         |  |  |  |  |       |       | 0.336 | 0.342 |
| Thermoleophilina | Gaiellales          | uncultured        | uncultured         | uncultured_organism          |  |  |  |  |       |       | 0.041 |       |
| Thermoleophilina | Gaiellales          | uncultured        | uncultured         | uncultured_Rubrobacterales   |  |  |  |  | 0.264 | 0.178 |       | 0.031 |
| Thermoleophilina | Gaiellales          | uncultured        | uncultured         | unidentified                 |  |  |  |  | 1.535 |       | 2.355 | 6.298 |
| Thermoleophilina | Gaiellales          | unidentified      | unidentified       | unidentified                 |  |  |  |  | 0.339 |       | 0.438 | 2.377 |
| Thermoleophilina | Solirubrobacterales | 67-14             | 67-14              | uncultured_bacterium         |  |  |  |  | 0.065 |       |       | 1.461 |
| Thermoleophilina | Solirubrobacterales | 67-14             | 67-14              | uncultured_Conexibacteraceae |  |  |  |  |       |       |       | 0.026 |

|                       |                     |                         |                         |                             |  |       |       |       |       |       |       |       |
|-----------------------|---------------------|-------------------------|-------------------------|-----------------------------|--|-------|-------|-------|-------|-------|-------|-------|
| Thermoleophila        | Solirubrobacterales | 67-14                   | 67-14                   | uncultured_Rubrobacteraceae |  |       |       |       | 0.12  | 0.505 |       |       |
| Thermoleophila        | Solirubrobacterales | 67-14                   | 67-14                   | uncultured_Rubrobacteria    |  |       |       |       |       |       | 0.069 |       |
| Thermoleophila        | Solirubrobacterales | 67-14                   | 67-14                   | unidentified                |  |       |       |       | 2.014 | 0.119 | 1.76  | 2.357 |
| Thermoleophila        | Solirubrobacterales | Solirubrobacteraceae    | Conexibacter            | unidentified                |  |       |       |       |       |       |       | 0.064 |
| Thermoleophila        | Solirubrobacterales | Solirubrobacteraceae    | Solirubrobacter         | uncultured_bacterium        |  |       |       |       | 0.409 | 0.401 | 0.272 | 0.265 |
| Thermoleophila        | Solirubrobacterales | Solirubrobacteraceae    | Solirubrobacter         | unidentified                |  |       |       |       | 0.309 |       | 0.332 | 0.093 |
| Thermoleophila        | Solirubrobacterales | Solirubrobacteraceae    | unidentified            | unidentified                |  | 0.628 | 0.466 | 1.031 |       |       | 0.249 |       |
| Thermoleophila        | Solirubrobacterales | unidentified            | unidentified            | unidentified                |  |       |       |       | 0.773 | 1.187 | 0.581 | 0.225 |
| Thermoleophila        | uncultured          | uncultured              | uncultured              | uncultured_bacterium        |  |       |       |       |       |       |       | 0.075 |
| Thermoleophila        | unidentified        | unidentified            | unidentified            | unidentified                |  |       |       |       | 0.005 |       | 0.065 | 0.09  |
| unidentified          | unidentified        | unidentified            | unidentified            | unidentified                |  |       |       |       | 0.633 |       | 0.124 | 0.088 |
| <b>Armatimonadota</b> |                     |                         |                         |                             |  |       |       |       |       |       |       |       |
| Armatimonadida        | Armatimonadales     | Armatimonadales         | Armatimonadales         | unidentified                |  | 0.033 |       |       |       |       |       |       |
| <b>Bacteroidota</b>   |                     |                         |                         |                             |  |       |       |       |       |       |       |       |
| Bacteroidia           | Bacteroidales       | Bacteroidaceae          | Bacteroides             | unidentified                |  |       |       |       |       |       |       | 0.02  |
| Bacteroidia           | Bacteroidales       | Bacteroidetes_vadinHA17 | Bacteroidetes_vadinHA17 | unidentified                |  |       |       |       |       |       |       | 0.024 |
| Bacteroidia           | Chitinophagales     | Chitinophagaceae        | Aurantisolimonas        | uncultured_bacterium        |  | 0.165 |       |       |       |       |       |       |
| Bacteroidia           | Chitinophagales     | Chitinophagaceae        | Chitinophaga            | Chitinophaga filiformis     |  |       |       |       |       |       | 0.083 |       |
| Bacteroidia           | Chitinophagales     | Chitinophagaceae        | Chitinophaga            | Chitinophaga ginsengihumi   |  |       |       |       |       |       | 0.078 |       |

|             |                 |                   |                        |                                       |  |       |       |  |       |  |       |       |
|-------------|-----------------|-------------------|------------------------|---------------------------------------|--|-------|-------|--|-------|--|-------|-------|
| Bacteroidia | Chitinophagales | Chitinophagaceae  | <i>Cnuella</i>         | uncultured_bacterium                  |  |       |       |  |       |  |       | 0.035 |
| Bacteroidia | Chitinophagales | Chitinophagaceae  | <i>Dinghuibacter</i>   | uncultured_bacterium                  |  |       |       |  |       |  | 0.032 |       |
| Bacteroidia | Chitinophagales | Chitinophagaceae  | <i>Edaphobaculum</i>   | uncultured_bacterium                  |  | 0.099 |       |  |       |  |       |       |
| Bacteroidia | Chitinophagales | Chitinophagaceae  | <i>Edaphobaculum</i>   | uncultured_ <i>Chitinophaga</i>       |  | 0.116 | 0.085 |  |       |  |       |       |
| Bacteroidia | Chitinophagales | Chitinophagaceae  | <i>Edaphobaculum</i>   | unidentified                          |  |       |       |  |       |  |       | 0.024 |
| Bacteroidia | Chitinophagales | Chitinophagaceae  | <i>Flavisolibacter</i> | <i>Flavisolibacter swuensis</i>       |  |       |       |  |       |  |       | 0.042 |
| Bacteroidia | Chitinophagales | Chitinophagaceae  | <i>Flavisolibacter</i> | <i>Flavisolibacter tropicus</i>       |  |       |       |  | 0.06  |  |       |       |
| Bacteroidia | Chitinophagales | Chitinophagaceae  | <i>Flavisolibacter</i> | unidentified                          |  | 0.232 | 0.254 |  |       |  |       | 0.232 |
| Bacteroidia | Chitinophagales | Chitinophagaceae  | <i>Niastella</i>       | uncultured_soil                       |  |       |       |  |       |  | 0.083 |       |
| Bacteroidia | Chitinophagales | Chitinophagaceae  | <i>Niastella</i>       | unidentified                          |  |       |       |  | 0.184 |  | 0.249 |       |
| Bacteroidia | Chitinophagales | Chitinophagaceae  | <i>Puia</i>            | unidentified                          |  |       |       |  |       |  | 0.065 |       |
| Bacteroidia | Chitinophagales | Chitinophagaceae  | <i>Terrimonas</i>      | unidentified                          |  |       |       |  | 0.13  |  | 0.175 |       |
| Bacteroidia | Chitinophagales | Chitinophagaceae  | uncultured             | <i>Panacibacter ginsenosidivorans</i> |  |       |       |  | 0.035 |  |       |       |
| Bacteroidia | Chitinophagales | Chitinophagaceae  | uncultured             | uncultured_ <i>Flavisolibacter</i>    |  |       |       |  | 0.05  |  |       |       |
| Bacteroidia | Chitinophagales | Chitinophagaceae  | uncultured             | uncultured_ <i>Niastella</i>          |  |       |       |  |       |  |       | 0.068 |
| Bacteroidia | Chitinophagales | Chitinophagaceae  | uncultured             | unidentified                          |  |       |       |  | 0.045 |  | 0.198 | 0.042 |
| Bacteroidia | Chitinophagales | Chitinophagaceae  | unidentified           | unidentified                          |  |       |       |  |       |  | 0.014 | 0.099 |
| Bacteroidia | Chitinophagales | Saprospiraceae    | uncultured             | unidentified                          |  |       |       |  | 0.015 |  |       |       |
| Bacteroidia | Chitinophagales | unidentified      | unidentified           | unidentified                          |  |       |       |  |       |  |       | 0.024 |
| Bacteroidia | Cytophagales    | Cyclobacteriaceae | uncultured             | unidentified                          |  |       |       |  |       |  |       | 0.035 |
| Bacteroidia | Cytophagales    | Hymenobacteraceae | <i>Hymenobacter</i>    | unidentified                          |  | 0.083 | 0.106 |  |       |  |       | 0.132 |
| Bacteroidia | Cytophagales    | Microscillaceae   | <i>Chryseolinea</i>    | uncultured_bacterium                  |  |       |       |  |       |  | 0.06  |       |

|              |                    |                     |                         |                             |  |       |       |       |       |  |       |       |
|--------------|--------------------|---------------------|-------------------------|-----------------------------|--|-------|-------|-------|-------|--|-------|-------|
| Bacteroidia  | Cytophagales       | Microscillaceae     | <i>Chryseolinea</i>     | unidentified                |  |       |       |       |       |  | 0.078 |       |
| Bacteroidia  | Cytophagales       | Microscillaceae     | <i>Flexibacter</i>      | unidentified                |  |       |       |       |       |  | 0.023 |       |
| Bacteroidia  | Cytophagales       | Microscillaceae     | <i>Ohtaekwangia</i>     | unidentified                |  |       |       |       |       |  |       | 0.022 |
| Bacteroidia  | Cytophagales       | Microscillaceae     | uncultured              | uncultured_soil             |  |       |       |       |       |  |       | 0.108 |
| Bacteroidia  | Cytophagales       | Microscillaceae     | uncultured              | unidentified                |  |       |       |       |       |  | 0.134 |       |
| Bacteroidia  | Cytophagales       | Microscillaceae     | unidentified            | unidentified                |  |       |       |       |       |  | 0.06  |       |
| Bacteroidia  | Cytophagales       | Spirosomaceae       | <i>Dyadobacter</i>      | unidentified                |  | 0.248 |       |       |       |  | 0.078 |       |
| Bacteroidia  | Cytophagales       | Spirosomaceae       | <i>Larkinella</i>       | <i>Larkinella harenae</i>   |  | 0.298 | 0.254 |       |       |  |       |       |
| Bacteroidia  | Cytophagales       | Spirosomaceae       | <i>Larkinella</i>       | <i>Larkinella insperata</i> |  |       | 0.148 |       |       |  |       |       |
| Bacteroidia  | Cytophagales       | Spirosomaceae       | <i>Larkinella</i>       | <i>Larkinella ripae</i>     |  | 0.083 | 0.106 |       |       |  | 0.014 |       |
| Bacteroidia  | Cytophagales       | Spirosomaceae       | <i>Rudanella</i>        | uncultured_bacterium        |  | 0.165 |       | 0.387 |       |  |       |       |
| Bacteroidia  | Cytophagales       | Spirosomaceae       | <i>Spirosoma</i>        | <i>Spirosoma oryzae</i>     |  | 0.48  |       | 0.43  |       |  |       |       |
| Bacteroidia  | Cytophagales       | Spirosomaceae       | <i>Spirosoma</i>        | unidentified                |  | 0.232 | 0.466 |       |       |  |       |       |
| Bacteroidia  | Flavobacteriales   | Flavobacteriaceae   | <i>Flavobacterium</i>   | unidentified                |  |       |       |       |       |  | 0.041 |       |
| Bacteroidia  | Flavobacteriales   | NS9_marine_group    | NS9_marine_group        | metagenome                  |  |       |       |       | 0.015 |  |       |       |
| Bacteroidia  | Flavobacteriales   | unidentified        | unidentified            | unidentified                |  |       |       |       |       |  |       | 0.066 |
| Bacteroidia  | Flavobacteriales   | Weeksellaceae       | <i>Chryseobacterium</i> | unidentified                |  | 0.099 |       |       |       |  |       |       |
| Bacteroidia  | Sphingobacteriales | AKYH767             | AKYH767                 | uncultured_bacterium        |  |       |       |       |       |  | 0.014 |       |
| Bacteroidia  | Sphingobacteriales | env.OPS_17          | env.OPS_17              | unidentified                |  |       |       |       | 0.035 |  |       | 0.057 |
| Bacteroidia  | Sphingobacteriales | Sphingobacteriaceae | <i>Mucilaginibacter</i> | unidentified                |  |       |       |       |       |  | 0.032 |       |
| Bacteroidia  | Sphingobacteriales | unidentified        | unidentified            | unidentified                |  |       |       |       |       |  |       | 0.009 |
| Kapabacteria | Kapabacteriales    | Kapabacteriales     | <i>Kapabacteriales</i>  | unidentified                |  |       |       |       |       |  | 0.028 |       |
| SJA-28       | SJA-28             | SJA-28              | SJA-28                  | metagenome                  |  |       |       |       | 0.02  |  |       |       |
| SJA-28       | SJA-28             | SJA-28              | SJA-28                  | uncultured_bacterium        |  |       |       |       |       |  |       | 0.093 |

| Bdellovibrionota |                   |                    |                     |                          |  |  |  |  |       |       |       |       |
|------------------|-------------------|--------------------|---------------------|--------------------------|--|--|--|--|-------|-------|-------|-------|
| Bdellovibrionia  | Bdellovibrionales | Bdellovibrionaceae | <i>Bdellovibrio</i> | uncultured_bacterium     |  |  |  |  |       |       |       | 0.051 |
| Bdellovibrionia  | Bdellovibrionales | Bdellovibrionaceae | OM27_clade          | uncultured_Myxococcales  |  |  |  |  |       |       | 0.092 |       |
| Bdellovibrionia  | Bdellovibrionales | Bdellovibrionaceae | OM27_clade          | unidentified             |  |  |  |  |       |       |       | 0.11  |
| Oligoflexia      | Oligoflexales     | uncultured         | uncultured          | unidentified             |  |  |  |  |       |       |       | 0.04  |
| Chloroflexi      |                   |                    |                     |                          |  |  |  |  |       |       |       |       |
| Anaerolineae     | Anaerolineales    | Anaerolineaceae    | uncultured          | unidentified             |  |  |  |  | 0.035 |       |       | 0.042 |
| Anaerolineae     | Anaerolineales    | Anaerolineaceae    | UTCFX1              | uncultured_bacterium     |  |  |  |  |       |       |       | 0.042 |
| Anaerolineae     | Ardenticatenales  | Ardenticatenaceae  | uncultured          | unidentified             |  |  |  |  |       | 0.148 |       |       |
| Anaerolineae     | Ardenticatenales  | uncultured         | uncultured          | uncultured_bacterium     |  |  |  |  | 0.02  |       | 0.051 |       |
| Anaerolineae     | Ardenticatenales  | uncultured         | uncultured          | uncultured_Litorilinea   |  |  |  |  |       |       | 0.069 |       |
| Anaerolineae     | Ardenticatenales  | uncultured         | uncultured          | unidentified             |  |  |  |  |       |       | 0.014 |       |
| Anaerolineae     | Caldilineales     | Caldilineaceae     | <i>Litorilinea</i>  | uncultured_bacterium     |  |  |  |  |       |       |       | 0.057 |
| Anaerolineae     | Caldilineales     | Caldilineaceae     | uncultured          | uncultured_bacterium     |  |  |  |  |       |       |       | 0.071 |
| Anaerolineae     | Caldilineales     | Caldilineaceae     | uncultured          | uncultured_soil          |  |  |  |  | 0.05  |       |       |       |
| Anaerolineae     | Caldilineales     | Caldilineaceae     | uncultured          | unidentified             |  |  |  |  |       |       | 0.032 |       |
| Anaerolineae     | RBG-13-54-9       | RBG-13-54-9        | RBG-13-54-9         | unidentified             |  |  |  |  |       |       | 0.014 |       |
| Anaerolineae     | SBR1031           | A4b                | A4b                 | uncultured_bacterium     |  |  |  |  | 0.055 |       | 0.253 | 0.426 |
| Anaerolineae     | SBR1031           | A4b                | A4b                 | uncultured_Caldilineales |  |  |  |  |       |       |       | 0.095 |
| Anaerolineae     | SBR1031           | A4b                | A4b                 | uncultured_soil          |  |  |  |  |       |       | 0.046 |       |
| Anaerolineae     | SBR1031           | A4b                | A4b                 | unidentified             |  |  |  |  | 0.065 | 0.134 | 0.028 | 0.247 |
| Anaerolineae     | SBR1031           | SBR1031            | SBR1031             | uncultured_bacterium     |  |  |  |  |       |       |       | 0.055 |

|                 |                   |                    |                    |                                   |       |       |       |       |       |       |       |       |
|-----------------|-------------------|--------------------|--------------------|-----------------------------------|-------|-------|-------|-------|-------|-------|-------|-------|
| Anaerolineae    | SBR1031           | SBR1031            | SBR1031            | uncultured_ <i>Caldilineaceae</i> |       |       |       |       |       |       | 0.014 |       |
| Anaerolineae    | SBR1031           | SBR1031            | SBR1031            | uncultured_soil                   |       |       |       |       |       |       |       | 0.082 |
| Anaerolineae    | SBR1031           | SBR1031            | SBR1031            | unidentified                      |       |       |       |       |       |       |       | 0.106 |
| Anaerolineae    | SBR1031           | unidentified       | unidentified       | unidentified                      |       |       |       |       |       |       | 0.051 | 0.174 |
| Chloroflexia    | Chloroflexales    | Roseiflexaceae     | uncultured         | uncultured_bacterium              | 0.288 | 0.281 | 0.996 | 0.43  | 0.314 |       | 0.152 | 0.185 |
| Chloroflexia    | Chloroflexales    | Roseiflexaceae     | uncultured         | uncultured_ <i>Chloroflexi</i>    |       |       |       |       |       |       | 0.129 |       |
| Chloroflexia    | Thermomicrobiales | JG30-KF-CM45       | JG30-KF-CM45       | uncultured_bacterium              | 0.959 | 1.472 | 1.208 | 0.258 | 0.025 |       |       | 0.177 |
| Chloroflexia    | Thermomicrobiales | JG30-KF-CM45       | JG30-KF-CM45       | unidentified                      |       |       |       |       |       |       |       | 0.073 |
| Chloroflexia    | Thermomicrobiales | Thermomicrobiaceae | <i>Nitrolancea</i> | <i>Nitrolancea hollandica</i>     |       |       |       |       |       |       |       | 0.053 |
| Dehalococcoidia | S085              | S085               | S085               | metagenome                        |       |       |       |       |       |       |       | 0.038 |
| Dehalococcoidia | S085              | S085               | S085               | uncultured_bacterium              |       |       |       |       | 0.055 |       | 0.392 | 0.108 |
| Dehalococcoidia | S085              | S085               | S085               | uncultured_ <i>Chloroflexi</i>    |       |       |       |       |       |       |       | 0.053 |
| Dehalococcoidia | S085              | S085               | S085               | unidentified                      |       |       |       |       |       |       | 0.069 | 0.373 |
| Dehalococcoidia | SAR202_clade      | SAR202_clade       | SAR202_clade       | uncultured_soil                   |       |       |       |       |       |       | 0.023 |       |
| Gitt-GS-136     | Gitt-GS-136       | Gitt-GS-136        | Gitt-GS-136        | uncultured_bacterium              |       |       |       |       | 0.065 |       | 0.484 | 0.135 |
| Gitt-GS-136     | Gitt-GS-136       | Gitt-GS-136        | Gitt-GS-136        | unidentified                      |       |       |       |       |       |       | 0.17  |       |
| JG30-KF-CM66    | JG30-KF-CM66      | JG30-KF-CM66       | JG30-KF-CM66       | uncultured_bacterium              |       |       |       |       |       |       |       | 0.06  |
| KD4-96          | KD4-96            | KD4-96             | KD4-96             | metagenome                        |       |       |       |       |       | 0.341 |       | 0.104 |
| KD4-96          | KD4-96            | KD4-96             | KD4-96             | uncultured_bacterium              |       |       |       |       |       |       | 0.465 | 0.113 |
| KD4-96          | KD4-96            | KD4-96             | KD4-96             | uncultured_ <i>Chloroflexi</i>    |       |       |       |       |       | 0.579 | 0.06  |       |

|                      |                    |                      |                           |                                |       |  |       |  |       |       |       |       |
|----------------------|--------------------|----------------------|---------------------------|--------------------------------|-------|--|-------|--|-------|-------|-------|-------|
| KD4-96               | KD4-96             | KD4-96               | KD4-96                    | uncultured_ <i>Levilina</i>    |       |  |       |  |       |       |       | 0.108 |
| KD4-96               | KD4-96             | KD4-96               | KD4-96                    | unidentified                   |       |  |       |  | 0.454 | 0.267 | 0.576 | 0.185 |
| Ktedonobacteria      | C0119              | C0119                | C0119                     | uncultured_bacterium           |       |  |       |  |       |       | 0.023 |       |
| Ktedonobacteria      | Ktedonobacteriales | Ktedonobacteraceae   | uncultured                | unidentified                   |       |  |       |  |       |       | 0.037 |       |
| OLB14                | OLB14              | OLB14                | OLB14                     | uncultured_bacterium           |       |  |       |  |       |       | 0.051 |       |
| P2-11E               | P2-11E             | P2-11E               | P2-11E                    | uncultured_bacterium           |       |  |       |  |       |       | 0.152 | 0.018 |
| TK10                 | TK10               | TK10                 | TK10                      | bacterium_Ellin                |       |  |       |  |       | 0.208 |       |       |
| TK10                 | TK10               | TK10                 | TK10                      | uncultured_bacterium           |       |  |       |  | 0.13  |       | 0.097 | 0.117 |
| TK10                 | TK10               | TK10                 | TK10                      | uncultured_ <i>Chloroflexi</i> |       |  |       |  | 0.065 |       |       | 0.035 |
| TK10                 | TK10               | TK10                 | TK10                      | uncultured <i>Firmicutes</i>   |       |  |       |  | 0.14  |       |       |       |
| TK10                 | TK10               | TK10                 | TK10                      | unidentified                   |       |  |       |  | 0.135 |       | 0.244 | 0.161 |
| <b>Cyanobacteria</b> |                    |                      |                           |                                |       |  |       |  |       |       |       |       |
| Cyanobacteriia       | Cyanobacteriales   | Chroococcidiopsaceae | unidentified              | unidentified                   |       |  |       |  |       |       |       | 0.227 |
| Cyanobacteriia       | Cyanobacteriales   | Nostocaceae          | <i>Scytonema_VB-61278</i> | unidentified                   | 1.726 |  | 0.339 |  |       |       |       |       |
| Cyanobacteriia       | Cyanobacteriales   | unidentified         | unidentified              | unidentified                   |       |  |       |  |       |       |       | 0.141 |
| Sericytochromatia    | Sericytochromatia  | Sericytochromatia    | <i>Sericytochromatia</i>  | uncultured bacterium           |       |  |       |  |       |       |       | 0.009 |
| Vampirivibrionia     | Obscuribacteriales | Obscuribacteraceae   | <i>Obscuribacteraceae</i> | bioreactor metagenome          |       |  |       |  |       |       | 0.032 |       |
| Vampirivibrionia     | Obscuribacteriales | Obscuribacteraceae   | <i>Obscuribacteraceae</i> | uncultured_bacterium           |       |  |       |  |       |       |       | 0.238 |
| Vampirivibrionia     | Vampirovibrionales | Vampirovibrionales   | <i>Vampirovibrionales</i> | uncultured_bacterium           |       |  |       |  |       |       |       | 0.093 |
| <b>Deinococcota</b>  |                    |                      |                           |                                |       |  |       |  |       |       |       |       |

|                          |                     |                      |                          |                                     |  |       |       |  |       |  |       |       |
|--------------------------|---------------------|----------------------|--------------------------|-------------------------------------|--|-------|-------|--|-------|--|-------|-------|
| Deinococci               | Deinococcales       | Deinococcaceae       | <i>Deinococcus</i>       | <i>Deinococcus cellulosilyticus</i> |  |       |       |  |       |  |       | 0.053 |
| Deinococci               | Deinococcales       | Deinococcaceae       | <i>Deinococcus</i>       | unidentified                        |  |       |       |  |       |  |       | 0.115 |
| Deinococci               | Deinococcales       | Trueperaceae         | <i>Truepera</i>          | uncultured_ <i>Deinococcus</i>      |  |       | 0.276 |  |       |  |       |       |
| Deinococci               | Deinococcales       | Trueperaceae         | <i>Truepera</i>          | unidentified                        |  | 0.281 | 0.339 |  |       |  |       |       |
| <b>Dependentiae</b>      |                     |                      |                          |                                     |  |       |       |  |       |  |       |       |
| Babeliae                 | Babeliales          | unidentified         | unidentified             | unidentified                        |  |       |       |  |       |  |       | 0.068 |
| Babeliae                 | Babeliales          | Vermiphilaceae       | <i>Vermiphilaceae</i>    | uncultured_bacterium                |  |       |       |  |       |  |       | 0.053 |
| Babeliae                 | Babeliales          | Vermiphilaceae       | <i>Vermiphilaceae</i>    | unidentified                        |  |       |       |  |       |  |       | 0.024 |
| <b>Desulfobacterota</b>  |                     |                      |                          |                                     |  |       |       |  |       |  |       |       |
| Desulfuromonadia         | Geobacterales       | Geobacteraceae       | <i>Citri fermentans</i>  | unidentified                        |  |       |       |  |       |  |       | 0.046 |
| Desulfuromonadia         | Geobacterales       | Geobacteraceae       | <i>Geobacter</i>         | unidentified                        |  |       |       |  |       |  |       | 0.013 |
| Desulfuromonadia         | Geobacterales       | Geobacteraceae       | unidentified             | unidentified                        |  |       |       |  |       |  |       | 0.084 |
| Syntrophobacteria        | Syntrophobacterales | Syntrophobacteraceae | <i>Syntrophobacter</i>   | unidentified                        |  |       |       |  |       |  |       | 0.031 |
| uncultured               | uncultured          | uncultured           | uncultured               | uncultured_ <i>Dongia</i>           |  |       |       |  |       |  |       | 0.051 |
| uncultured               | uncultured          | uncultured           | uncultured               | unidentified                        |  |       |       |  | 0.12  |  | 0.152 | 0.159 |
| <b>Elusimicrobiota</b>   |                     |                      |                          |                                     |  |       |       |  |       |  |       |       |
| Elusimicrobia            | MVP-88              | MVP-88               | MVP-88                   | uncultured_bacterium                |  |       |       |  |       |  |       | 0.11  |
| Lineage_IIb              | Lineage_IIb         | Lineage_IIb          | <i>Lineage_IIb</i>       | uncultured bacterium                |  |       |       |  | 0.015 |  |       |       |
| <b>Entotheonellaeota</b> |                     |                      |                          |                                     |  |       |       |  |       |  |       |       |
| Entotheonellia           | Entotheonellales    | Entotheonellaceae    | <i>Entotheonellaceae</i> | uncultured bacterium                |  |       |       |  | 0.065 |  | 0.221 | 0.132 |
| Entotheonellia           | Entotheonellales    | Entotheonellaceae    | <i>Entotheonellaceae</i> | unidentified                        |  |       |       |  | 0.753 |  |       | 0.055 |



| Firmicutes |            |                |                       |                                |  |  |  |  |        |        |       |       |
|------------|------------|----------------|-----------------------|--------------------------------|--|--|--|--|--------|--------|-------|-------|
| Bacilli    | Bacillales | Bacillaceae    | <i>Bacillus</i>       | <i>Bacillus acidicele</i>      |  |  |  |  | 1.092  | 1.633  |       |       |
| Bacilli    | Bacillales | Bacillaceae    | <i>Bacillus</i>       | <i>Bacillus arbutinivorans</i> |  |  |  |  | 1.396  | 5.387  |       |       |
| Bacilli    | Bacillales | Bacillaceae    | <i>Bacillus</i>       | <i>Bacillus asahii</i>         |  |  |  |  | 0.045  | 1.306  |       | 0.071 |
| Bacilli    | Bacillales | Bacillaceae    | <i>Bacillus</i>       | <i>Bacillus fastidiosus</i>    |  |  |  |  |        |        | 0.023 |       |
| Bacilli    | Bacillales | Bacillaceae    | <i>Bacillus</i>       | <i>Bacillus fengquensis</i>    |  |  |  |  | 0.508  |        | 0.723 | 0.104 |
| Bacilli    | Bacillales | Bacillaceae    | <i>Bacillus</i>       | <i>Bacillus funiculus</i>      |  |  |  |  | 2.258  |        | 0.309 |       |
| Bacilli    | Bacillales | Bacillaceae    | <i>Bacillus</i>       | <i>Bacillus idriensis</i>      |  |  |  |  |        | 0.89   |       |       |
| Bacilli    | Bacillales | Bacillaceae    | <i>Bacillus</i>       | <i>Bacillus korlensis</i>      |  |  |  |  | 0.08   |        |       |       |
| Bacilli    | Bacillales | Bacillaceae    | <i>Bacillus</i>       | <i>Bacillus malikii</i>        |  |  |  |  | 0.309  |        |       |       |
| Bacilli    | Bacillales | Bacillaceae    | <i>Bacillus</i>       | <i>Bacillus nealsonii</i>      |  |  |  |  | 0.623  | 1.469  |       |       |
| Bacilli    | Bacillales | Bacillaceae    | <i>Bacillus</i>       | <i>Bacillus niacini</i>        |  |  |  |  | 1.226  |        |       |       |
| Bacilli    | Bacillales | Bacillaceae    | <i>Bacillus</i>       | uncultured_organism            |  |  |  |  |        |        | 0.065 | 0.104 |
| Bacilli    | Bacillales | Bacillaceae    | <i>Bacillus</i>       | unidentified                   |  |  |  |  | 24.892 | 28.317 | 2.696 | 0.653 |
| Bacilli    | Bacillales | Bacillaceae    | <i>Fictibacillus</i>  | unidentified                   |  |  |  |  |        | 1.232  |       |       |
| Bacilli    | Bacillales | Bacillaceae    | unidentified          | unidentified                   |  |  |  |  |        |        |       | 0.055 |
| Bacilli    | Bacillales | Bacillaceae    | <i>Virgibacillus</i>  | uncultured_bacterium           |  |  |  |  |        |        |       | 0.04  |
| Bacilli    | Bacillales | Planococcaceae | <i>Chungangia</i>     | unidentified                   |  |  |  |  | 0.015  |        |       |       |
| Bacilli    | Bacillales | Planococcaceae | <i>Domibacillus</i>   | uncultured_Bacillus            |  |  |  |  | 1.665  | 1.187  |       |       |
| Bacilli    | Bacillales | Planococcaceae | <i>Domibacillus</i>   | uncultured_bacterium           |  |  |  |  | 0.055  |        |       |       |
| Bacilli    | Bacillales | Planococcaceae | <i>Domibacillus</i>   | unidentified                   |  |  |  |  | 0.862  | 0.505  | 0.032 |       |
| Bacilli    | Bacillales | Planococcaceae | <i>Lysinibacillus</i> | <i>Lysinibacillus composti</i> |  |  |  |  | 0.075  |        |       |       |
| Bacilli    | Bacillales | Planococcaceae | <i>Lysinibacillus</i> | uncultured_bacterium           |  |  |  |  |        |        | 0.037 |       |
| Bacilli    | Bacillales | unidentified   | unidentified          | unidentified                   |  |  |  |  | 0.165  | 0.564  |       | 0.119 |

|                          |                                     |                                     |                          |                                       |  |  |  |  |       |       |       |       |
|--------------------------|-------------------------------------|-------------------------------------|--------------------------|---------------------------------------|--|--|--|--|-------|-------|-------|-------|
| Bacilli                  | Brevibacillales                     | Brevibacillaceae                    | <i>Brevibacillus</i>     | unidentified                          |  |  |  |  | 0.045 |       |       | 0.115 |
| Bacilli                  | Lactobacillales                     | Streptococcaceae                    | <i>Streptococcus</i>     | <i>Streptococcus agalactiae</i>       |  |  |  |  |       |       |       | 1.079 |
| Bacilli                  | Lactobacillales                     | Streptococcaceae                    | <i>Streptococcus</i>     | uncultured_organism                   |  |  |  |  |       |       |       | 0.108 |
| Bacilli                  | Paenibacillales                     | Paenibacillaceae                    | <i>Ammoniphilus</i>      | unidentified                          |  |  |  |  | 0.803 |       | 0.166 |       |
| Bacilli                  | Paenibacillales                     | Paenibacillaceae                    | <i>Paenibacillus</i>     | <i>Paenibacillus cellulosilyticus</i> |  |  |  |  |       |       |       | 0.071 |
| Bacilli                  | Paenibacillales                     | Paenibacillaceae                    | <i>Paenibacillus</i>     | <i>Paenibacillus pocheonensis</i>     |  |  |  |  | 0.095 |       |       |       |
| Bacilli                  | Paenibacillales                     | Paenibacillaceae                    | <i>Paenibacillus</i>     | <i>Paenibacillus zeae</i>             |  |  |  |  |       |       |       | 0.062 |
| Bacilli                  | Paenibacillales                     | Paenibacillaceae                    | <i>Paenibacillus</i>     | unidentified                          |  |  |  |  | 0.319 | 0.519 |       | 0.031 |
| Bacilli                  | Staphylococcales                    | Staphylococcaceae                   | <i>Staphylococcus</i>    | unidentified                          |  |  |  |  |       |       |       | 0.647 |
| Clostridia               | Peptostreptococcales-Tissierellales | Peptostreptococcales-Tissierellales | <i>Finegoldia</i>        | <i>Finegoldia magna</i>               |  |  |  |  |       |       |       | 0.075 |
| <b>GAL15</b>             |                                     |                                     |                          |                                       |  |  |  |  |       |       |       |       |
| GAL15                    | GAL15                               | GAL15                               | GAL15                    | uncultured_bacterium                  |  |  |  |  | 0.025 |       |       |       |
| <b>Gemmatimonadota</b>   |                                     |                                     |                          |                                       |  |  |  |  |       |       |       |       |
| AKAU4049                 | AKAU4049                            | AKAU4049                            | AKAU4049                 | uncultured_bacterium                  |  |  |  |  |       |       | 0.041 |       |
| AKAU4049                 | AKAU4049                            | AKAU4049                            | AKAU4049                 | uncultured_soil                       |  |  |  |  |       |       | 0.065 | 0.026 |
| BD2-11_terrestrial_group | BD2-11_terrestrial_group            | BD2-11_terrestrial_group            | BD2-11_terrestrial_group | metagenome                            |  |  |  |  |       |       | 0.088 |       |
| BD2-11_terrestrial_group | BD2-11_terrestrial_group            | BD2-11_terrestrial_group            | BD2-11_terrestrial_group | uncultured_soil                       |  |  |  |  |       |       |       | 0.15  |
| Gemmatimonadetes         | Gemmatimonadales                    | Gemmatimonadaceae                   | <i>Gemmatimonas</i>      | unidentified                          |  |  |  |  | 0.065 |       |       | 0.238 |
| Gemmatimonadetes         | Gemmatimonadales                    | Gemmatimonadaceae                   | <i>Roseisolibacter</i>   | uncultured_bacterium                  |  |  |  |  |       |       |       | 0.084 |

|                         |                         |                         |                           |                                     |  |  |       |  |       |       |       |       |
|-------------------------|-------------------------|-------------------------|---------------------------|-------------------------------------|--|--|-------|--|-------|-------|-------|-------|
| Gemmatimonadetes        | Gemmatimonadales        | Gemmatimonadaceae       | <i>Roseisolibacter</i>    | unidentified                        |  |  |       |  | 0.075 |       |       |       |
| Gemmatimonadetes        | Gemmatimonadales        | Gemmatimonadaceae       | uncultured                | uncultured_proteobacterium          |  |  |       |  | 0.234 |       |       | 0.066 |
| Gemmatimonadetes        | Gemmatimonadales        | Gemmatimonadaceae       | uncultured                | unidentified                        |  |  |       |  | 0.269 |       | 1.106 | 0.863 |
| Gemmatimonadetes        | Gemmatimonadales        | Gemmatimonadaceae       | unidentified              | unidentified                        |  |  |       |  | 0.494 |       | 0.65  | 0.353 |
| Longimicrobia           | Longimicrobiales        | Longimicrobiaceae       | <i>Longimicrobiaceae</i>  | uncultured_bacterium                |  |  |       |  |       |       |       | 0.13  |
| Longimicrobia           | Longimicrobiales        | Longimicrobiaceae       | <i>Longimicrobiaceae</i>  | uncultured_soil                     |  |  |       |  |       |       |       | 0.055 |
| Longimicrobia           | Longimicrobiales        | Longimicrobiaceae       | <i>Longimicrobium</i>     | uncultured_bacterium                |  |  | 0.064 |  |       |       |       |       |
| Longimicrobia           | Longimicrobiales        | Longimicrobiaceae       | YC-ZSS-LKJ147             | uncultured_bacterium                |  |  |       |  |       |       |       | 0.026 |
| Longimicrobia           | Longimicrobiales        | Longimicrobiaceae       | YC-ZSS-LKJ147             | unidentified                        |  |  |       |  |       |       |       | 0.02  |
| S0134_terrestrial_group | S0134_terrestrial_group | S0134_terrestrial_group | S0134_terrestrial_group   | uncultured_bacterium                |  |  |       |  | 0.025 |       | 0.005 | 0.064 |
| S0134_terrestrial_group | S0134_terrestrial_group | S0134_terrestrial_group | S0134_terrestrial_group   | uncultured <i>Gemma timonadales</i> |  |  |       |  | 0.055 |       |       | 0.053 |
| S0134_terrestrial_group | S0134_terrestrial_group | S0134_terrestrial_group | S0134_terrestrial_group   | uncultured <i>Gemma timonadetes</i> |  |  |       |  |       |       | 0.134 | 0.062 |
| S0134_terrestrial_group | S0134_terrestrial_group | S0134_terrestrial_group | S0134_terrestrial_group   | unidentified                        |  |  |       |  | 0.095 |       | 0.092 | 0.04  |
| <b>Latescibacterota</b> |                         |                         |                           |                                     |  |  |       |  |       |       |       |       |
| Latescibacteria         | Latescibacterales       | Latescibacteraceae      | <i>Latescibacteraceae</i> | uncultured_bacterium                |  |  |       |  |       |       | 0.046 |       |
| Latescibacterota        | Latescibacterota        | Latescibacterota        | <i>Latescibacterota</i>   | uncultured_bacterium                |  |  |       |  |       |       | 0.134 |       |
| Latescibacterota        | Latescibacterota        | Latescibacterota        | <i>Latescibacterota</i>   | uncultured_soil                     |  |  |       |  |       |       | 0.138 |       |
| Latescibacterota        | Latescibacterota        | Latescibacterota        | <i>Latescibacterota</i>   | unidentified                        |  |  |       |  |       | 0.119 | 0.207 | 0.117 |

| MBNT15            |                 |                       |                  |                                |  |       |       |       |       |       |       |       |
|-------------------|-----------------|-----------------------|------------------|--------------------------------|--|-------|-------|-------|-------|-------|-------|-------|
| MBNT15            | MBNT15          | MBNT15                | MBNT15           | uncultured_bacterium           |  |       |       |       |       |       | 0.12  |       |
| MBNT15            | MBNT15          | MBNT15                | MBNT15           | uncultured_Myxococcales        |  |       |       |       | 0.045 |       |       |       |
| MBNT15            | MBNT15          | MBNT15                | MBNT15           | unidentified                   |  |       |       |       |       |       |       | 0.051 |
| Methyloirabiolota |                 |                       |                  |                                |  |       |       |       |       |       |       |       |
| Methyloirabiolota | Rokubacteriales | Rokubacteriales       | Rokubacteriales  | metagenome                     |  |       |       |       | 0.155 |       |       | 0.013 |
| Methyloirabiolota | Rokubacteriales | Rokubacteriales       | Rokubacteriales  | uncultured_bacterium           |  |       |       |       | 0.698 |       | 1.364 | 0.814 |
| Methyloirabiolota | Rokubacteriales | WX65                  | WX65             | uncultured_bacterium           |  |       |       |       |       |       |       | 0.117 |
| Myxococcota       |                 |                       |                  |                                |  |       |       |       |       |       |       |       |
| bacteriap25       | bacteriap25     | bacteriap25           | bacteriap25      | uncultured_Syntrophobacterales |  |       |       |       |       |       | 0.078 |       |
| bacteriap25       | bacteriap25     | bacteriap25           | bacteriap25      | unidentified                   |  |       |       |       | 0.972 | 0.208 | 0.977 | 0.333 |
| bacteriap25       | bacteriap25     | bacteriap25           | bacteriap25      | unidentified                   |  |       |       |       |       |       |       | 0.046 |
| Myxococcia        | Myxococcales    | Anaeromyxobacteraceae | Anaeromyxobacter | uncultured_Anaeromyxobacter    |  |       |       |       |       |       |       | 0.022 |
| Myxococcia        | Myxococcales    | Anaeromyxobacteraceae | Anaeromyxobacter | unidentified                   |  |       |       |       |       |       |       | 0.026 |
| Myxococcia        | Myxococcales    | Myxococcaceae         | Cystobacter      | unidentified                   |  | 0.943 | 0.827 | 1.504 |       |       |       |       |
| Myxococcia        | Myxococcales    | Myxococcaceae         | P3OB-42          | uncultured_Cystobacterineae    |  |       |       |       |       |       | 0.041 |       |
| Myxococcia        | Myxococcales    | Myxococcaceae         | uncultured       | uncultured_bacterium           |  |       |       |       |       |       |       | 0.06  |
| Myxococcia        | Myxococcales    | Myxococcaceae         | unidentified     | unidentified                   |  | 0.38  | 0.17  |       | 0.354 |       | 0.539 | 0.097 |
| Polyangia         | Haliangiales    | Haliangiaceae         | Haliangium       | uncultured_Myxococcales        |  |       |       |       |       |       | 0.055 |       |
| Polyangia         | Haliangiales    | Haliangiaceae         | Haliangium       | uncultured_proteobacterium     |  |       |       |       | 0.055 |       |       |       |
| Polyangia         | Haliangiales    | Haliangiaceae         | Haliangium       | unidentified                   |  |       |       |       |       | 0.134 | 0.286 | 0.166 |

|                     |               |                    |                         |                                   |  |  |  |  |       |       |       |       |
|---------------------|---------------|--------------------|-------------------------|-----------------------------------|--|--|--|--|-------|-------|-------|-------|
| Polyangia           | mle1-27       | mle1-27            | mle1-27                 | unidentified                      |  |  |  |  |       |       |       | 0.077 |
| Polyangia           | Polyangiales  | BIrii41            | BIrii41                 | uncultured_bacterium              |  |  |  |  |       | 0.119 | 0.065 | 0.013 |
| Polyangia           | Polyangiales  | BIrii41            | BIrii41                 | unidentified                      |  |  |  |  |       |       |       | 0.097 |
| Polyangia           | Polyangiales  | Eel-36e1D6         | Eel-36e1D6              | uncultured_bacterium              |  |  |  |  |       |       |       | 0.031 |
| Polyangia           | Polyangiales  | Phaselicystidaceae | <i>Phaselicystis</i>    | uncultured_bacterium              |  |  |  |  |       |       |       | 0.026 |
| Polyangia           | Polyangiales  | Phaselicystidaceae | <i>Phaselicystis</i>    | uncultured_ <i>Byssovora</i>      |  |  |  |  |       |       | 0.097 |       |
| Polyangia           | Polyangiales  | Polyangiaceae      | <i>Minicystis</i>       | uncultured_bacterium              |  |  |  |  |       |       |       | 0.042 |
| Polyangia           | Polyangiales  | Polyangiaceae      | <i>Pajaroellobacter</i> | unidentified                      |  |  |  |  |       |       |       | 0.073 |
| Polyangia           | Polyangiales  | Polyangiaceae      | <i>Polyangiaceae</i>    | uncultured_bacterium              |  |  |  |  |       |       |       | 0.062 |
| Polyangia           | Polyangiales  | Sandaracinaceae    | uncultured              | uncultured_bacterium              |  |  |  |  |       |       | 0.041 |       |
| Polyangia           | Polyangiales  | Sandaracinaceae    | uncultured              | unidentified                      |  |  |  |  | 0.135 |       | 0.244 | 0.104 |
| Polyangia           | Polyangiales  | unidentified       | unidentified            | unidentified                      |  |  |  |  |       |       |       | 0.018 |
| unidentified        | unidentified  | unidentified       | unidentified            | unidentified                      |  |  |  |  |       |       | 0.028 |       |
| <b>NB1-j</b>        |               |                    |                         |                                   |  |  |  |  |       |       |       |       |
| NB1-j               | NB1-j         | NB1-j              | NB1-j                   | uncultured_ <i>Desulfo glaeba</i> |  |  |  |  |       |       | 0.074 | 0.073 |
| NB1-j               | NB1-j         | NB1-j              | NB1-j                   | uncultured_ <i>Myxococcales</i>   |  |  |  |  |       |       | 0.065 |       |
| NB1-j               | NB1-j         | NB1-j              | NB1-j                   | unidentified                      |  |  |  |  | 0.135 |       | 0.313 | 0.093 |
| <b>Nitrospirota</b> |               |                    |                         |                                   |  |  |  |  |       |       |       |       |
| Nitrospira          | Nitrospirales | Nitrospiraceae     | <i>Nitrospira</i>       | <i>Nitrospira japonica</i>        |  |  |  |  | 0.259 | 0.163 | 0.295 | 0.104 |
| Nitrospira          | Nitrospirales | Nitrospiraceae     | <i>Nitrospira</i>       | uncultured_ <i>Nitrospiraceae</i> |  |  |  |  | 0.035 |       |       |       |
| Nitrospira          | Nitrospirales | Nitrospiraceae     | <i>Nitrospira</i>       | uncultured_soil                   |  |  |  |  |       |       | 0.217 |       |
| Nitrospira          | Nitrospirales | Nitrospiraceae     | <i>Nitrospira</i>       | unidentified                      |  |  |  |  | 0.055 |       | 0.083 |       |

| Patescibacteria |                           |                           |                                  |                          |  |       |       |  |       |       |       |       |
|-----------------|---------------------------|---------------------------|----------------------------------|--------------------------|--|-------|-------|--|-------|-------|-------|-------|
| Parcubacteria   | Candidatus_Kaiserbacteria | Candidatus_Kaiserbacteria | <i>Candidatus_Kaiserbacteria</i> | uncultured_bacterium     |  |       |       |  |       |       | 0.111 |       |
| Parcubacteria   | Parcubacteria             | Parcubacteria             | <i>Parcubacteria</i>             | uncultured_bacterium     |  |       |       |  |       |       | 0.051 | 0.049 |
| Saccharimonadia | Saccharimonadales         | LWQ8                      | LWQ8                             | uncultured_bacterium     |  |       |       |  | 0.169 |       |       |       |
| Saccharimonadia | Saccharimonadales         | LWQ8                      | LWQ8                             | unidentified             |  |       |       |  |       | 0.163 | 0.129 |       |
| Saccharimonadia | Saccharimonadales         | S32                       | TM7                              | unidentified             |  |       |       |  |       |       |       | 0.073 |
| Saccharimonadia | Saccharimonadales         | Saccharimonadales         | TM7a                             | uncultured_bacterium     |  | 0.149 |       |  |       |       |       |       |
| Saccharimonadia | Saccharimonadales         | Saccharimonadales         | <i>Saccharimonadales</i>         | unidentified             |  |       |       |  | 0.095 |       | 0.346 | 0.09  |
| Saccharimonadia | Saccharimonadales         | unidentified              | unidentified                     | unidentified             |  | 0.182 | 0.064 |  | 0.045 |       | 0.24  | 0.15  |
| Saccharimonadia | Saccharimonadales         | WWH38                     | WWH38                            | uncultured_bacterium     |  |       |       |  |       |       | 0.032 |       |
| Planctomycetota |                           |                           |                                  |                          |  |       |       |  |       |       |       |       |
| OM190           | OM190                     | OM190                     | OM190                            | uncultured_bacterium     |  |       |       |  |       |       |       | 0.026 |
| Phycisphaerae   | Phycisphaerales           | Phycisphaerales           | AKYG587                          | uncultured_bacterium     |  |       |       |  | 0.095 |       | 0.032 | 0.022 |
| Phycisphaerae   | Phycisphaerales           | Phycisphaerales           | CL500-3                          | uncultured_bacterium     |  |       |       |  |       |       | 0.046 |       |
| Phycisphaerae   | Phycisphaerales           | Phycisphaerales           | SM1A02                           | unidentified             |  |       |       |  |       |       |       | 0.011 |
| Phycisphaerae   | Tepidisphaerales          | WD2101_soil_group         | WD2101_soil_group                | uncultured_bacterium     |  |       |       |  | 0.02  |       |       |       |
| Phycisphaerae   | Tepidisphaerales          | WD2101_soil_group         | WD2101_soil_group                | uncultured_planctomycete |  |       |       |  |       |       |       | 0.018 |
| Phycisphaerae   | Tepidisphaerales          | WD2101_soil_group         | WD2101_soil_group                | unidentified             |  | 0.066 |       |  | 0.075 |       | 0.111 | 0.044 |
| Planctomycetes  | Gemmatales                | Gemmatales                | uncultured                       | uncultured_bacterium     |  |       |       |  |       |       |       | 0.035 |

|                       |                 |                  |                         |                                     |       |       |       |      |       |       |       |       |
|-----------------------|-----------------|------------------|-------------------------|-------------------------------------|-------|-------|-------|------|-------|-------|-------|-------|
| Planctomycetes        | Gemmatales      | Gemmataceae      | uncultured              | unidentified                        |       |       |       |      |       |       |       | 0.024 |
| unidentified          | unidentified    | unidentified     | unidentified            | unidentified                        |       |       |       |      |       |       | 0.018 |       |
| <b>Proteobacteria</b> |                 |                  |                         |                                     |       |       |       |      |       |       |       |       |
| Alphaproteobacteria   | Acetobacterales | Acetobacteraceae | <i>Acidicaldus</i>      | uncultured_ <i>Acidishaera</i>      |       |       |       |      |       | 0.193 |       | 0.049 |
| Alphaproteobacteria   | Acetobacterales | Acetobacteraceae | <i>Belnapia</i>         | uncultured_bacterium                | 1.151 | 0.248 |       |      |       |       |       |       |
| Alphaproteobacteria   | Acetobacterales | Acetobacteraceae | <i>Roseomonas</i>       | unidentified                        |       | 1.174 | 0.89  | 1.59 |       | 0.134 | 0.06  |       |
| Alphaproteobacteria   | Acetobacterales | Acetobacteraceae | uncultured              | uncultured_ <i>Paracraurococcus</i> |       |       |       |      | 0.05  |       |       |       |
| Alphaproteobacteria   | Acetobacterales | Acetobacteraceae | unidentified            | unidentified                        | 1.63  | 1.918 | 0.551 |      |       |       |       | 0.022 |
| Alphaproteobacteria   | Azospirillales  | Azospirillaceae  | uncultured              | uncultured_bacterium                |       |       |       |      | 0.04  |       | 0.028 |       |
| Alphaproteobacteria   | Azospirillales  | Inquilinaceae    | <i>Inquilinus</i>       | <i>Inquilinus</i> sp.               |       |       |       |      |       | 0.267 | 0.083 |       |
| Alphaproteobacteria   | Azospirillales  | uncultured       | uncultured              | unidentified                        |       |       |       |      | 0.11  |       | 0.097 | 0.022 |
| Alphaproteobacteria   | Caulobacterales | Caulobacteraceae | <i>Brevundimonas</i>    | drinking_water                      |       | 0.248 | 0.148 |      |       |       |       |       |
| Alphaproteobacteria   | Caulobacterales | Caulobacteraceae | <i>Brevundimonas</i>    | unidentified                        |       | 2.233 | 0.933 |      |       |       | 0.124 |       |
| Alphaproteobacteria   | Caulobacterales | Caulobacteraceae | <i>Caulobacter</i>      | unidentified                        |       |       |       |      |       |       | 0.433 |       |
| Alphaproteobacteria   | Caulobacterales | Caulobacteraceae | <i>Phenylobacterium</i> | uncultured_soil                     |       |       |       |      |       | 0.163 | 0.152 |       |
| Alphaproteobacteria   | Caulobacterales | Caulobacteraceae | <i>Phenylobacterium</i> | unidentified                        |       |       |       |      | 0.165 |       | 0.23  | 0.154 |
| Alphaproteobacteria   | Caulobacterales | Caulobacteraceae | uncultured              | unidentified                        |       |       |       |      |       |       |       | 0.102 |
| Alphaproteobacteria   | Caulobacterales | Hyphomonadaceae  | <i>Hirschia</i>         | unidentified                        |       |       |       |      | 0.13  |       | 0.014 |       |
| Alphaproteobacteria   | Caulobacterales | Hyphomonadaceae  | SWB02                   | uncultured_soil                     |       |       |       |      |       |       | 0.037 |       |

|                     |                    |                                   |                         |                               |  |       |       |       |       |       |       |       |
|---------------------|--------------------|-----------------------------------|-------------------------|-------------------------------|--|-------|-------|-------|-------|-------|-------|-------|
| Alphaproteobacteria | Caulobacterales    | Hyphomonadaceae                   | SWB02                   | unidentified                  |  |       |       |       |       |       | 0.152 | 0.029 |
| Alphaproteobacteria | Caulobacterales    | Parvularculaceae                  | <i>Amphiplicatus</i>    | uncultured_bacterium          |  |       |       |       |       | 0.134 |       |       |
| Alphaproteobacteria | Defluviicoccales   | Defluviicoccaceae                 | <i>Defluviicoccus</i>   | unidentified                  |  |       |       |       |       |       |       | 0.307 |
| Alphaproteobacteria | Dongiales          | Dongiaceae                        | <i>Dongia</i>           | metagenome                    |  |       |       |       | 0.174 | 0.327 |       | 0.051 |
| Alphaproteobacteria | Dongiales          | Dongiaceae                        | <i>Dongia</i>           | unidentified                  |  |       |       |       | 1.276 | 1.929 | 4.069 | 0.607 |
| Alphaproteobacteria | Elsterales         | uncultured                        | uncultured              | unidentified                  |  |       |       |       |       |       | 0.101 |       |
| Alphaproteobacteria | Holosporales       | Holosporaceae                     | uncultured              | uncultured_bacterium          |  |       |       |       |       |       |       | 0.819 |
| Alphaproteobacteria | Micropepsales      | Micropepsaceae                    | uncultured              | unidentified                  |  |       |       |       | 0.03  |       |       |       |
| Alphaproteobacteria | Parvibaculales     | Parvibaculaceae                   | uncultured              | uncultured_bacterium          |  |       |       |       |       |       | 0.055 |       |
| Alphaproteobacteria | Puniceispirillales | Puniceispirillales_Incertae Sedis | <i>Constrictibacter</i> | uncultured_soil               |  | 0.198 | 0.148 |       |       |       |       |       |
| Alphaproteobacteria | Reyranellales      | Reyranellaceae                    | <i>Reyranella</i>       | unidentified                  |  |       |       |       | 0.563 | 2.196 | 1.682 | 2.006 |
| Alphaproteobacteria | Reyranellales      | Reyranellaceae                    | uncultured              | uncultured_bacterium          |  |       |       |       | 0.13  | 0.193 |       | 0.086 |
| Alphaproteobacteria | Reyranellales      | Reyranellaceae                    | uncultured              | uncultured_Rhodospirillales   |  |       |       |       |       |       | 0.088 |       |
| Alphaproteobacteria | Reyranellales      | Reyranellaceae                    | uncultured              | unidentified                  |  |       |       |       |       |       | 0.212 |       |
| Alphaproteobacteria | Rhizobiales        | A0839                             | A0839                   | uncultured_Phyllobacteriaceae |  |       |       |       | 0.075 | 0.252 | 0.106 | 0.06  |
| Alphaproteobacteria | Rhizobiales        | A0839                             | A0839                   | uncultured_sludge             |  |       |       |       |       | 0.223 | 0.115 |       |
| Alphaproteobacteria | Rhizobiales        | Beijerinckiaceae                  | 1174-901-12             | unidentified                  |  | 0.496 |       | 0.859 |       |       |       |       |
| Alphaproteobacteria | Rhizobiales        | Beijerinckiaceae                  | FFCH5858                | unidentified                  |  |       |       |       |       |       |       | 0.218 |



|                     |             |                   |                                          |                                    |        |        |        |        |       |       |       |       |
|---------------------|-------------|-------------------|------------------------------------------|------------------------------------|--------|--------|--------|--------|-------|-------|-------|-------|
| Alphaproteobacteria | Rhizobiales | Beijerinckiaceae  | <i>Methylobacterium-Methylobacterium</i> | <i>Methylobacterium aquaticum</i>  |        |        |        | 1.59   |       |       |       |       |
| Alphaproteobacteria | Rhizobiales | Beijerinckiaceae  | <i>Methylobacterium-Methylobacterium</i> | <i>Methylobacterium brachiatum</i> |        |        |        | 1.504  |       |       |       |       |
| Alphaproteobacteria | Rhizobiales | Beijerinckiaceae  | <i>Methylobacterium-Methylobacterium</i> | <i>Methylobacterium hispanicum</i> |        | 1.108  | 6.169  | 2.578  |       |       |       |       |
| Alphaproteobacteria | Rhizobiales | Beijerinckiaceae  | <i>Methylobacterium-Methylobacterium</i> | <i>Methylobacterium komagatae</i>  | 3.547  | 2.911  | 1.95   | 2.192  |       |       |       |       |
| Alphaproteobacteria | Rhizobiales | Beijerinckiaceae  | <i>Methylobacterium-Methylobacterium</i> | <i>Methylobacterium podarium</i>   |        | 0.711  |        |        |       |       |       |       |
| Alphaproteobacteria | Rhizobiales | Beijerinckiaceae  | <i>Methylobacterium-Methylobacterium</i> | unidentified                       | 19.847 | 15.396 | 16.154 | 24.065 |       |       |       |       |
| Alphaproteobacteria | Rhizobiales | Beijerinckiaceae  | <i>Microvirga</i>                        | unidentified                       |        | 0.281  | 0.657  |        | 1.346 | 0.445 | 0.525 | 0.135 |
| Alphaproteobacteria | Rhizobiales | Beijerinckiaceae  | unidentified                             | unidentified                       |        | 0.992  | 0.996  |        | 0.145 |       |       | 0.086 |
| Alphaproteobacteria | Rhizobiales | D05-2             | D05-2                                    | uncultured_bacterium               |        |        |        |        | 0.04  |       | 0.106 |       |
| Alphaproteobacteria | Rhizobiales | Devosiaceae       | <i>Devosia</i>                           | unidentified                       |        | 1.637  | 0.254  |        |       |       | 0.161 |       |
| Alphaproteobacteria | Rhizobiales | Devosiaceae       | uncultured                               | unidentified                       |        |        |        |        |       |       | 0.253 |       |
| Alphaproteobacteria | Rhizobiales | Devosiaceae       | unidentified                             | unidentified                       |        |        | 0.424  |        |       |       |       |       |
| Alphaproteobacteria | Rhizobiales | Hyphomicrobiaceae | <i>Hyphomicrobium</i>                    | uncultured_Hyphomicrobium          |        |        |        |        |       | 0.416 |       | 0.011 |
| Alphaproteobacteria | Rhizobiales | Hyphomicrobiaceae | <i>Hyphomicrobium</i>                    | unidentified                       |        |        |        |        | 0.224 | 0.282 | 0.41  |       |
| Alphaproteobacteria | Rhizobiales | Hyphomicrobiaceae | <i>Pedomicrobium</i>                     | uncultured_bacterium               |        |        |        |        | 0.135 | 0.237 | 0.161 |       |
| Alphaproteobacteria | Rhizobiales | Hyphomicrobiaceae | <i>Pedomicrobium</i>                     | uncultured_Hyphomicrobiaceae       |        |        |        |        | 0.354 |       | 0.553 | 0.252 |
| Alphaproteobacteria | Rhizobiales | Hyphomicrobiaceae | <i>Pedomicrobium</i>                     | unidentified                       |        |        |        |        | 0.334 | 3.413 | 0.991 | 0.11  |
| Alphaproteobacteria | Rhizobiales | Hyphomicrobiaceae | unidentified                             | unidentified                       |        |        |        |        |       |       | 0.028 |       |

|                     |             |                    |                                                           |                                  |        |       |       |        |       |       |       |       |
|---------------------|-------------|--------------------|-----------------------------------------------------------|----------------------------------|--------|-------|-------|--------|-------|-------|-------|-------|
| Alphaproteobacteria | Rhizobiales | KF-JG30-B3         | KF-JG30-B3                                                | uncultured_bacterium             |        |       |       |        | 0.264 |       | 0.24  |       |
| Alphaproteobacteria | Rhizobiales | KF-JG30-B3         | KF-JG30-B3                                                | unidentified                     |        |       |       |        |       |       | 0.327 | 0.17  |
| Alphaproteobacteria | Rhizobiales | Labraceae          | <i>Labrys</i>                                             | unidentified                     |        |       |       |        |       |       | 0.028 |       |
| Alphaproteobacteria | Rhizobiales | Methylogigellaceae | <i>Methylogigellaceae</i>                                 | uncultured_bacterium             |        |       |       |        | 0.578 | 0.49  | 1.055 |       |
| Alphaproteobacteria | Rhizobiales | Methylogigellaceae | unidentified                                              | unidentified                     |        |       |       |        |       |       |       | 0.073 |
| Alphaproteobacteria | Rhizobiales | Methylophilaceae   | unidentified                                              | unidentified                     |        | 0.347 |       |        |       |       |       |       |
| Alphaproteobacteria | Rhizobiales | Rhizobiaceae       | <i>Allorhizobium-Neorhizobium-Pararhizobium-Rhizobium</i> | unidentified                     | 5.944  | 4.581 | 1.42  | 4.168  | 0.354 | 1.647 | 1.276 | 0.23  |
| Alphaproteobacteria | Rhizobiales | Rhizobiaceae       | <i>Aureimonas</i>                                         | <i>Aurantimonas</i> sp.          |        | 1.306 | 0.996 |        |       |       |       |       |
| Alphaproteobacteria | Rhizobiales | Rhizobiaceae       | <i>Aureimonas</i>                                         | <i>Aureimonas jatrophae</i>      | 11.218 | 4.994 | 5.109 | 21.917 |       |       |       |       |
| Alphaproteobacteria | Rhizobiales | Rhizobiaceae       | <i>Aureimonas</i>                                         | <i>Aureimonas phyllosphaerae</i> |        | 0.827 | 0.827 | 0.473  |       |       |       |       |
| Alphaproteobacteria | Rhizobiales | Rhizobiaceae       | <i>Aureimonas</i>                                         | <i>Aureimonas rubiginis</i>      |        | 0.413 |       | 2.192  |       |       |       |       |
| Alphaproteobacteria | Rhizobiales | Rhizobiaceae       | <i>Aureimonas</i>                                         | uncultured_bacterium             |        |       | 0.127 |        |       |       |       |       |
| Alphaproteobacteria | Rhizobiales | Rhizobiaceae       | <i>Aureimonas</i>                                         | unidentified                     | 9.684  | 7.557 | 6.084 | 7.263  |       |       |       |       |
| Alphaproteobacteria | Rhizobiales | Rhizobiaceae       | <i>Ensifer</i>                                            | unidentified                     |        |       |       |        | 0.09  | 0.534 | 0.272 |       |
| Alphaproteobacteria | Rhizobiales | Rhizobiaceae       | <i>Mesorhizobium</i>                                      | unidentified                     | 1.63   | 1.439 | 1.399 |        | 0.678 | 1.558 | 0.461 | 0.245 |
| Alphaproteobacteria | Rhizobiales | Rhizobiaceae       | <i>Tianweitania</i>                                       | uncultured_bacterium             |        | 0.695 |       |        |       |       |       |       |
| Alphaproteobacteria | Rhizobiales | Rhizobiaceae       | unidentified                                              | unidentified                     | 4.219  | 7.64  | 5.109 | 1.633  | 0.04  | 0.579 | 0.825 |       |

|                     |             |                            |                       |                                        |      |       |       |      |       |       |       |       |
|---------------------|-------------|----------------------------|-----------------------|----------------------------------------|------|-------|-------|------|-------|-------|-------|-------|
| Alphaproteobacteria | Rhizobiales | Rhizobiales_Incertae Sedis | <i>Bauldia</i>        | uncultured_bacterium                   |      |       |       |      |       |       | 0.078 |       |
| Alphaproteobacteria | Rhizobiales | Rhizobiales_Incertae Sedis | <i>Bauldia</i>        | uncultured_ <i>Phyllobacteriaceae</i>  |      |       |       |      | 0.03  |       |       |       |
| Alphaproteobacteria | Rhizobiales | Rhizobiales_Incertae Sedis | <i>Bauldia</i>        | unidentified                           |      |       |       |      | 0.02  |       | 0.051 |       |
| Alphaproteobacteria | Rhizobiales | Rhizobiales_Incertae Sedis | <i>Nordella</i>       | uncultured_ <i>Alphaproteobacteria</i> |      |       |       |      | 0.284 |       |       | 0.066 |
| Alphaproteobacteria | Rhizobiales | Rhizobiales_Incertae Sedis | <i>Nordella</i>       | uncultured_ <i>Phyllobacteriaceae</i>  |      |       |       |      | 0.145 | 0.401 | 0.078 | 0.044 |
| Alphaproteobacteria | Rhizobiales | Rhizobiales_Incertae Sedis | <i>Nordella</i>       | unidentified                           |      |       |       |      | 0.09  | 0.95  | 0.728 | 0.121 |
| Alphaproteobacteria | Rhizobiales | Rhizobiales_Incertae Sedis | unidentified          | unidentified                           |      |       |       |      |       | 0.252 |       |       |
| Alphaproteobacteria | Rhizobiales | Rhodomicrobiaceae          | <i>Rhodomicrobium</i> | uncultured_ <i>Alphaproteobacteria</i> |      |       |       |      | 0.14  |       |       |       |
| Alphaproteobacteria | Rhizobiales | Rhodomicrobiaceae          | <i>Rhodomicrobium</i> | uncultured_bacterium                   |      |       |       |      | 0.065 | 0.386 | 0.295 |       |
| Alphaproteobacteria | Rhizobiales | Rhodomicrobiaceae          | <i>Rhodomicrobium</i> | unidentified                           |      |       |       |      |       | 0.282 | 0.147 |       |
| Alphaproteobacteria | Rhizobiales | Stappiaceae                | <i>Agaricicola</i>    | <i>Agaricicola taiwanensis</i>         |      | 1.753 | 1.336 |      |       |       |       |       |
| Alphaproteobacteria | Rhizobiales | uncultured                 | uncultured            | uncultured_ <i>Alphaproteobacteria</i> |      |       |       |      |       |       | 0.143 |       |
| Alphaproteobacteria | Rhizobiales | uncultured                 | uncultured            | unidentified                           |      |       |       |      | 0.374 | 0.876 | 0.571 | 1.006 |
| Alphaproteobacteria | Rhizobiales | unidentified               | unidentified          | unidentified                           | 4.89 | 2.828 | 6.826 | 5.93 | 0.628 | 0.638 | 0.622 | 0.055 |
| Alphaproteobacteria | Rhizobiales | Xanthobacteraceae          | <i>Bradyrhizobium</i> | unidentified                           |      |       |       |      | 1.62  | 5.239 | 1.737 | 0.781 |
| Alphaproteobacteria | Rhizobiales | Xanthobacteraceae          | <i>Pseudolabrys</i>   | uncultured_ <i>Bradyrhizobiaceae</i>   |      |       |       |      | 0.553 | 0.371 | 0.129 |       |
| Alphaproteobacteria | Rhizobiales | Xanthobacteraceae          | <i>Pseudolabrys</i>   | unidentified                           |      |       |       |      |       |       |       | 0.04  |
| Alphaproteobacteria | Rhizobiales | Xanthobacteraceae          | <i>Rhodoplanes</i>    | uncultured_bacterium                   |      |       |       |      |       |       |       | 0.099 |



|                     |                  |                   |                        |                                      |       |       |       |       |       |       |       |       |
|---------------------|------------------|-------------------|------------------------|--------------------------------------|-------|-------|-------|-------|-------|-------|-------|-------|
| Alphaproteobacteria | Sphingomonadales | Sphingomonadaceae | <i>Novosphingobium</i> | unidentified                         |       |       |       |       |       | 0.148 | 0.442 |       |
| Alphaproteobacteria | Sphingomonadales | Sphingomonadaceae | <i>Porphyrobacter</i>  | unidentified                         |       |       |       |       |       |       |       | 0.097 |
| Alphaproteobacteria | Sphingomonadales | Sphingomonadaceae | <i>Qipengyuania</i>    | unidentified                         |       |       |       |       |       |       | 0.046 |       |
| Alphaproteobacteria | Sphingomonadales | Sphingomonadaceae | <i>Sphingobium</i>     | unidentified                         |       |       |       |       |       |       | 0.415 | 0.23  |
| Alphaproteobacteria | Sphingomonadales | Sphingomonadaceae | <i>Sphingomonas</i>    | <i>Caulobacter</i> sp.               |       |       |       |       |       | 0.505 |       |       |
| Alphaproteobacteria | Sphingomonadales | Sphingomonadaceae | <i>Sphingomonas</i>    | <i>Sphingomonas gimensis</i>         |       | 0.843 | 0.7   | 0.602 |       |       |       |       |
| Alphaproteobacteria | Sphingomonadales | Sphingomonadaceae | <i>Sphingomonas</i>    | <i>Sphingomonas guangdongensis</i>   |       | 0.579 |       | 0.559 |       |       |       |       |
| Alphaproteobacteria | Sphingomonadales | Sphingomonadaceae | <i>Sphingomonas</i>    | <i>Sphingomonas phyllosphaerae</i>   |       | 0.182 |       |       |       |       |       |       |
| Alphaproteobacteria | Sphingomonadales | Sphingomonadaceae | <i>Sphingomonas</i>    | <i>Sphingomonas rhizophila</i>       |       |       |       |       |       |       | 0.111 |       |
| Alphaproteobacteria | Sphingomonadales | Sphingomonadaceae | <i>Sphingomonas</i>    | unidentified                         |       | 3.456 | 2.141 | 5.243 | 0.573 |       | 0.396 | 0.161 |
| Alphaproteobacteria | Sphingomonadales | Sphingomonadaceae | unidentified           | unidentified                         | 6.328 | 5.093 | 9.307 | 2.235 | 0.01  |       | 0.35  | 0.26  |
| Alphaproteobacteria | Tistrellales     | Geminicoccaceae   | uncultured             | uncultured_ <i>Acetobacteraceae</i>  |       |       |       |       |       |       |       | 0.022 |
| Alphaproteobacteria | Tistrellales     | Geminicoccaceae   | uncultured             | uncultured_bacterium                 |       |       |       |       |       |       | 0.083 | 0.075 |
| Alphaproteobacteria | Tistrellales     | Geminicoccaceae   | uncultured             | unidentified                         |       |       |       |       |       |       | 0.23  | 0.046 |
| Alphaproteobacteria | uncultured       | uncultured        | uncultured             | <i>Rhodospirillaceae bacterium</i>   |       |       |       |       |       |       | 0.078 | 0.102 |
| Alphaproteobacteria | uncultured       | uncultured        | uncultured             | uncultured_ <i>Acetobacteraceae</i>  |       |       |       |       |       | 0.237 |       | 0.117 |
| Alphaproteobacteria | uncultured       | uncultured        | uncultured             | uncultured_bacterium                 |       |       |       |       |       |       | 0.009 | 0.033 |
| Alphaproteobacteria | uncultured       | uncultured        | uncultured             | uncultured_ <i>Rhodospirillaceae</i> |       |       |       |       |       |       |       | 0.024 |

|                     |                 |                   |                                                   |                             |  |       |       |  |       |       |       |       |
|---------------------|-----------------|-------------------|---------------------------------------------------|-----------------------------|--|-------|-------|--|-------|-------|-------|-------|
| Alphaproteobacteria | uncultured      | uncultured        | uncultured                                        | uncultured_soil             |  |       |       |  | 0.189 | 0.297 | 0.484 |       |
| Alphaproteobacteria | uncultured      | uncultured        | uncultured                                        | unidentified                |  |       |       |  | 0.09  |       | 0.783 | 0.17  |
| Alphaproteobacteria | unidentified    | unidentified      | unidentified                                      | unidentified                |  |       | 0.148 |  | 0.867 | 0.816 | 0.493 | 0.313 |
| Gammaproteobacteria | Burkholderiales | A21b              | A21b                                              | unidentified                |  |       |       |  | 0.045 |       |       | 0.033 |
| Gammaproteobacteria | Burkholderiales | B1-7BS            | B1-7BS                                            | uncultured_bacterium        |  |       |       |  | 0.05  |       | 0.276 | 0.044 |
| Gammaproteobacteria | Burkholderiales | Burkholderiaceae  | <i>Burkholderia-Caballeronia-Paraburkholderia</i> | uncultured_Burkholderiales  |  |       |       |  |       |       | 0.078 |       |
| Gammaproteobacteria | Burkholderiales | Burkholderiaceae  | <i>Burkholderia-Caballeronia-Paraburkholderia</i> | unidentified                |  | 0.265 |       |  |       |       |       |       |
| Gammaproteobacteria | Burkholderiales | Burkholderiaceae  | <i>Cupriavidus</i>                                | unidentified                |  |       |       |  | 0.125 | 0.341 | 0.184 |       |
| Gammaproteobacteria | Burkholderiales | Burkholderiaceae  | <i>Ralstonia</i>                                  | unidentified                |  |       |       |  |       |       |       | 0.238 |
| Gammaproteobacteria | Burkholderiales | Comamonadaceae    | <i>Azohydromonas</i>                              | uncultured_bacterium        |  |       |       |  |       |       |       | 0.02  |
| Gammaproteobacteria | Burkholderiales | Comamonadaceae    | <i>Ramlibacter</i>                                | unidentified                |  |       |       |  | 0.688 |       | 0.276 |       |
| Gammaproteobacteria | Burkholderiales | Comamonadaceae    | <i>Rivibacter</i>                                 | uncultured_bacterium        |  |       |       |  | 0.08  |       | 0.12  | 0.291 |
| Gammaproteobacteria | Burkholderiales | Comamonadaceae    | <i>Roseateles</i>                                 | unidentified                |  |       |       |  |       |       | 0.101 |       |
| Gammaproteobacteria | Burkholderiales | Comamonadaceae    | unidentified                                      | unidentified                |  | 0.281 |       |  | 0.234 |       | 0.479 | 0.19  |
| Gammaproteobacteria | Burkholderiales | Comamonadaceae    | <i>Variovorax</i>                                 | unidentified                |  |       |       |  |       | 0.163 | 0.124 |       |
| Gammaproteobacteria | Burkholderiales | Methylophilaceae  | MM2                                               | uncultured_bacterium        |  |       |       |  |       |       | 0.041 |       |
| Gammaproteobacteria | Burkholderiales | Nitrosomonadaceae | Ellin6067                                         | uncultured_Oxalobacteraceae |  |       |       |  |       |       |       | 0.11  |



|                     |                                    |                     |                    |                                |  |       |  |  |       |       |       |       |
|---------------------|------------------------------------|---------------------|--------------------|--------------------------------|--|-------|--|--|-------|-------|-------|-------|
| Gammaproteobacteria | CCD24                              | CCD24               | CCD24              | uncultured_gamma               |  |       |  |  |       |       | 0.212 |       |
| Gammaproteobacteria | CCD24                              | CCD24               | CCD24              | unidentified                   |  |       |  |  | 0.179 | 0.312 | 0.548 |       |
| Gammaproteobacteria | Diplorickettsiales                 | Diplorickettsiaceae | <i>Aquicella</i>   | uncultured_ <i>Aquicella</i>   |  |       |  |  |       |       |       | 0.029 |
| Gammaproteobacteria | Diplorickettsiales                 | Diplorickettsiaceae | <i>Aquicella</i>   | uncultured_bacterium           |  |       |  |  |       |       |       | 1.953 |
| Gammaproteobacteria | Diplorickettsiales                 | Diplorickettsiaceae | <i>Aquicella</i>   | unidentified                   |  |       |  |  |       |       |       | 0.839 |
| Gammaproteobacteria | Diplorickettsiales                 | Diplorickettsiaceae | uncultured         | agricultural_soil              |  |       |  |  |       |       |       | 0.024 |
| Gammaproteobacteria | Diplorickettsiales                 | Diplorickettsiaceae | uncultured         | unidentified                   |  |       |  |  |       |       |       | 0.373 |
| Gammaproteobacteria | Diplorickettsiales                 | Diplorickettsiaceae | unidentified       | unidentified                   |  |       |  |  |       |       |       | 0.071 |
| Gammaproteobacteria | Enterobacterales                   | Erwiniaceae         | <i>Pantoea</i>     | unidentified                   |  | 0.182 |  |  | 0.055 |       |       |       |
| Gammaproteobacteria | EV818SWSAP88                       | EV818SWSAP88        | EV818SWSAP88       | uncultured_bacterium           |  |       |  |  |       |       |       | 0.088 |
| Gammaproteobacteria | Gammaproteobacteria_Incertae_Sedis | Unknown_Family      | <i>Acidibacter</i> | metagenome                     |  |       |  |  | 0.09  |       |       |       |
| Gammaproteobacteria | Gammaproteobacteria_Incertae_Sedis | Unknown_Family      | <i>Acidibacter</i> | uncultured_bacterium           |  |       |  |  |       |       | 0.078 |       |
| Gammaproteobacteria | Gammaproteobacteria_Incertae_Sedis | Unknown_Family      | <i>Acidibacter</i> | unidentified                   |  |       |  |  | 0.862 | 1.217 | 1.668 | 0.256 |
| Gammaproteobacteria | Gammaproteobacteria_Incertae_Sedis | Unknown_Family      | unidentified       | unidentified                   |  |       |  |  |       |       |       | 0.018 |
| Gammaproteobacteria | JG36-GS-52                         | JG36-GS-52          | JG36-GS-52         | uncultured_bacterium           |  |       |  |  |       |       |       | 0.062 |
| Gammaproteobacteria | Legionellales                      | Legionellaceae      | <i>Legionella</i>  | <i>Legionella adelaidensis</i> |  |       |  |  |       |       |       | 0.146 |



|                     |                     |                     |                        |                                    |       |       |  |  |       |       |       |       |
|---------------------|---------------------|---------------------|------------------------|------------------------------------|-------|-------|--|--|-------|-------|-------|-------|
| Gammaproteobacteria | Legionellales       | Legionellaceae      | <i>Legionella</i>      | uncultured_bacterium               |       |       |  |  |       |       |       | 0.038 |
| Gammaproteobacteria | Legionellales       | Legionellaceae      | <i>Legionella</i>      | unidentified                       |       |       |  |  |       |       |       | 3.699 |
| Gammaproteobacteria | PLTA13              | PLTA13              | PLTA13                 | uncultured_bacterium               |       |       |  |  |       |       |       | 0.038 |
| Gammaproteobacteria | PLTA13              | PLTA13              | PLTA13                 | uncultured_gamma                   |       |       |  |  | 0.085 | 0.297 | 0.276 | 0.062 |
| Gammaproteobacteria | PLTA13              | PLTA13              | PLTA13                 | unidentified                       |       |       |  |  |       |       |       | 0.057 |
| Gammaproteobacteria | Pseudomonadales     | Pseudomonadaceae    | <i>Pseudomonas</i>     | <i>Pseudomonas psychrotolerans</i> | 0.767 |       |  |  |       |       |       |       |
| Gammaproteobacteria | Pseudomonadales     | Pseudomonadaceae    | <i>Pseudomonas</i>     | unidentified                       |       |       |  |  | 0.055 |       |       |       |
| Gammaproteobacteria | Salinisphaerales    | Solimonadaceae      | <i>Polycyclovorans</i> | uncultured_bacterium               |       |       |  |  |       |       |       | 0.02  |
| Gammaproteobacteria | Steroidobacteriales | Steroidobacteraceae | <i>Steroidobacter</i>  | uncultured_Xanthomonadaceae        |       |       |  |  |       |       |       | 0.035 |
| Gammaproteobacteria | Steroidobacteriales | Steroidobacteraceae | <i>Steroidobacter</i>  | unidentified                       |       |       |  |  | 1.122 | 0.905 | 1.373 | 0.23  |
| Gammaproteobacteria | Steroidobacteriales | Steroidobacteraceae | uncultured             | unidentified                       |       |       |  |  | 0.095 |       |       | 0.04  |
| Gammaproteobacteria | Steroidobacteriales | Steroidobacteraceae | unidentified           | unidentified                       |       |       |  |  | 0.08  |       | 0.263 |       |
| Gammaproteobacteria | unidentified        | unidentified        | unidentified           | unidentified                       |       |       |  |  | 0.09  |       | 0.083 | 0.179 |
| Gammaproteobacteria | Xanthomonadales     | Rhodanobacteraceae  | <i>Luteibacter</i>     | <i>Luteibacter yejuensis</i>       |       | 0.149 |  |  |       |       |       |       |
| Gammaproteobacteria | Xanthomonadales     | Xanthomonadaceae    | <i>Arenimonas</i>      | unidentified                       |       |       |  |  |       |       |       | 0.057 |
| Gammaproteobacteria | Xanthomonadales     | Xanthomonadaceae    | <i>Lysobacter</i>      | <i>Lysobacter bugurensis</i>       |       |       |  |  |       |       |       | 0.035 |
| Gammaproteobacteria | Xanthomonadales     | Xanthomonadaceae    | <i>Lysobacter</i>      | <i>Lysobacter dokdonensis</i>      |       |       |  |  | 0.219 |       |       |       |
| Gammaproteobacteria | Xanthomonadales     | Xanthomonadaceae    | <i>Lysobacter</i>      | unidentified                       |       |       |  |  | 0.05  | 0.178 | 0.475 |       |

|                                      |                               |                               |                               |                      |       |       |       |  |  |  |       |       |
|--------------------------------------|-------------------------------|-------------------------------|-------------------------------|----------------------|-------|-------|-------|--|--|--|-------|-------|
| Gammaproteobacteria                  | Xanthomonadales               | Xanthomonadaceae              | <i>Stenotrophomonas</i>       | unidentified         | 3.356 | 0.099 |       |  |  |  |       | 0.064 |
| Gammaproteobacteria                  | Xanthomonadales               | Xanthomonadaceae              | unidentified                  | unidentified         |       | 0.198 |       |  |  |  | 0.217 |       |
| Gammaproteobacteria                  | Xanthomonadales               | Xanthomonadaceae              | <i>Xanthomonas</i>            | unidentified         | 1.534 |       | 0.276 |  |  |  |       |       |
| unidentified                         | unidentified                  | unidentified                  | unidentified                  | unidentified         |       |       | 0.339 |  |  |  | 0.304 | 0.062 |
| <b>SAR324_clade_(Marine_group_B)</b> |                               |                               |                               |                      |       |       |       |  |  |  |       |       |
| SAR324_clade (Marine_group_B)        | SAR324_clade (Marine_group_B) | SAR324_clade (Marine_group_B) | SAR324_clade (Marine_group_B) | uncultured_bacterium |       |       |       |  |  |  |       | 0.018 |
| <b>Verrucomicrobiota</b>             |                               |                               |                               |                      |       |       |       |  |  |  |       |       |
| Omnitrophia                          | Omnitrophales                 | Omnitrophaceae                | <i>Candidatus_Omnitrophus</i> | unidentified         |       |       |       |  |  |  |       | 0.02  |
| <b>WPS-2</b>                         |                               |                               |                               |                      |       |       |       |  |  |  |       |       |
| WPS-2                                | WPS-2                         | WPS-2                         | WPS-2                         | metagenome           |       |       |       |  |  |  |       | 0.108 |
