# Supplementary material for: Hidden Tenants: Microbiota of the Rhizosphere and Phyllosphere of Cordia dodecandra Trees in Mayan Forests and Homegardens
Source: Plants (Basel). 2022 Nov 15;11(22):3098. doi: 10.3390/plants11223098 (PMC9699097; doi:10.3390/plants11223098)
Supplement: Supplementary file 1 [file plants-11-03098-s001.zip]

Archive with 5 entries (5 files):
- plants-1975968-Supplementary material File S1.pdf
- plants-1975968-Supplementary material File S2.pdf
- plants-1975968-Supplementary material Table S1.pdf
- plants-1975968-Supplementary material Table S2.pdf
- plants-1975968-Supplementary material-Figures.pdf
